# Supplementary material
Source: PubMed Central journal article supplement (PMC6645087)
Supplement: ao8b01800_si_001.pdf [file ao8b01800_si_001.pdf]

## SUPPLEMENTARY INFORMATION

### Structural Characteristics, Population Analysis, and Binding Energies of $[\text{An}(\text{NO}_3)]^{2+}$ [with An = Ac - Lr]

Deborah A. Penchoff,<sup>† ‡\*</sup> Charles C. Peterson,<sup>§</sup> Mark S. Quint,<sup>†† ‡‡</sup> John D. Auxier II,<sup>§§</sup> George K. Schweitzer,<sup>†††</sup> David M. Jenkins,<sup>†††</sup> Robert J. Harrison,<sup>††† §§§ \*</sup> Howard L. Hall<sup>† §§ †††\*</sup>

<sup>†</sup>Institute for Nuclear Security, University of Tennessee, 1640 Cumberland Avenue, Tennessee 37996, USA

<sup>‡</sup>Joint Institute for Computational Sciences, Oak Ridge National Laboratory, Bldg. 5100, Oak Ridge, Tennessee 37831, USA

<sup>§</sup>University Information Technology, University of North Texas, 225 S. Avenue B, Denton, Texas 76201, USA

<sup>††</sup>Department of Nuclear Engineering, University of Tennessee, 301 Middle Dr., Pasqua Nuclear Engineering Bldg., Knoxville, Tennessee, 37996, USA

<sup>‡‡</sup>US Army Nuclear and Countering Weapons of Mass Destruction Agency (USANCA), United States Army, Ft. Jackson, South Carolina, 29715, USA

<sup>§§</sup>Radiochemistry Center of Excellence (RCOE), University of Tennessee, 1508 Middle Dr., Ferris Hall, Knoxville, Tennessee 37996, USA

<sup>†††</sup>Department of Chemistry, University of Tennessee, 1420 Circle Drive, Knoxville, Tennessee, 37996, USA

<sup>†††</sup>Institute for Advanced Computational Science, Stony Brook University, 100 Nicolls Road, Stony Brook, New York 11790 USA,

<sup>§§§</sup>Computational Sciences Center, Brookhaven National Laboratory, Bldg. 463B, Upton, New York, 11973, USA

<sup>†††</sup>Y-12 National Security Complex, Oak Ridge, Tennessee, 37830, USA, 37831 USA

The Supporting Information contains interatomic distances and angles from structural analysis, partial charges and orbital occupancies from population analysis, and thermochemical data from Gibbs free energy calculations.

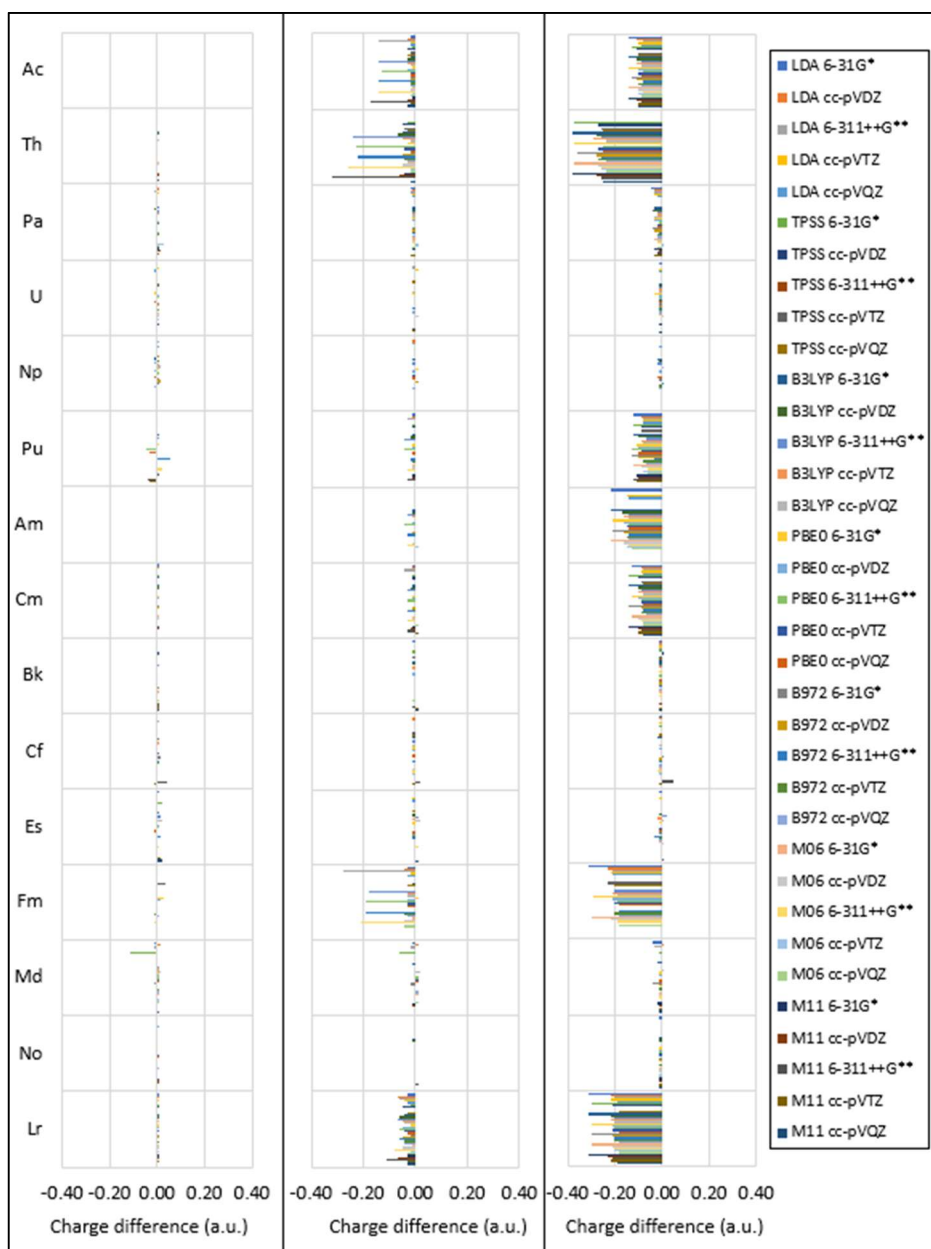

Figure S.1: Difference between charge of An in  $[\text{An}(\text{NO}_3)]^{2+}$  including (ad) and excluding (nd) the most diffuse basis functions in the Stuttgart 1997 basis set calculated with NBO (left), Mulliken (middle), and Löwdin (right), as indicated in Eq. 8.a. [Difference equal = charge calculated with ad - charge calculated with nd].

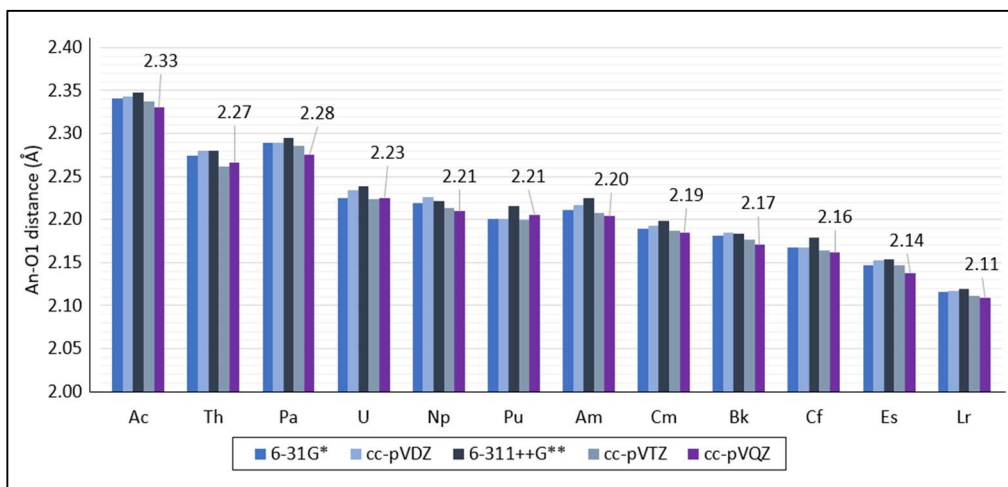

Figure S.2: Calculated An-O1 distance in  $[\text{An}(\text{NO}_3)]^{+2}$  with the PBE0 functional, the 6-31G\*, cc-pVDZ, 6-311++G\*\*, cc-pVTZ, and cc-pVQZ basis set for N and O atoms, and the Stuttgart RSC 1997 ECP and basis set including all diffuse basis functions in the basis set (in Å). Fm, Md, and No are shown in Figure S.2. [Lines are included as a visual aid and do not represent function continuity].

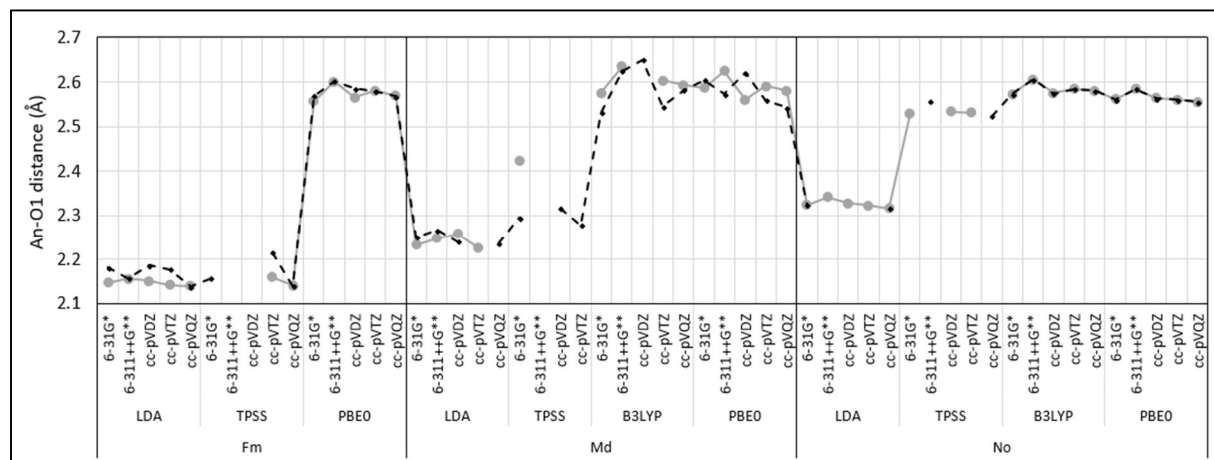

Figure S.3: Calculated An-O1 distance in  $[\text{An}(\text{NO}_3)]^{+2}$  for Fm, Md, and No with LDA, TPSS, B3LYP, and PBE0 functionals, the 6-31G\*, cc-pVDZ, 6-311++G\*\*, cc-pVTZ, and cc-pVQZ basis set for N and O atoms, and the Stuttgart RSC 1997 ECP and basis set including all diffuse basis functions in the basis set (in Å). [Lines are included as a visual aid and do not represent function continuity].

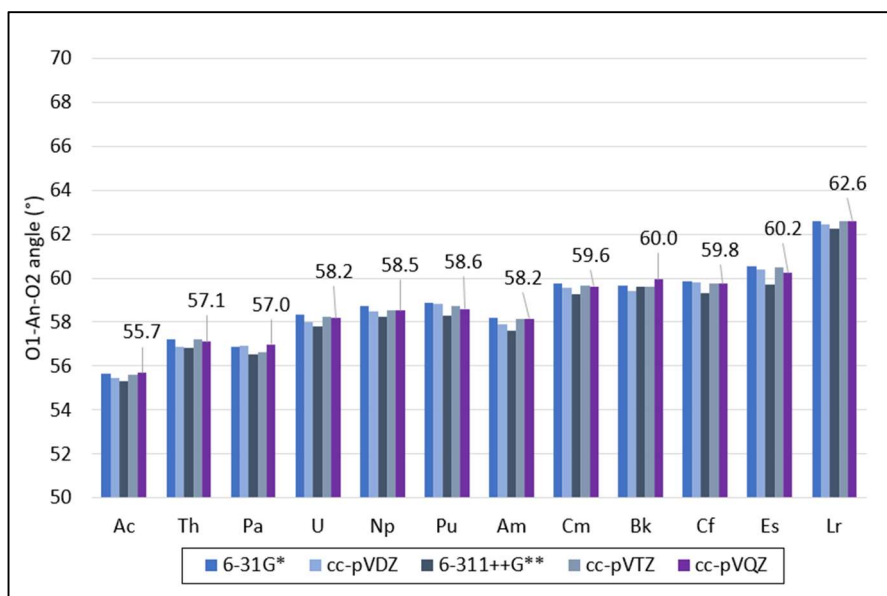

Figure S.4: Calculated O1-An-O2 angle in  $[An(NO_3)]^{+2}$  with the PBE0 functional, the 6-31G\*, cc-pVDZ, 6-311++G\*\*, cc-pVTZ, and cc-pVQZ basis set for N and O atoms, and the Stuttgart RSC 1997 ECP and basis set including all diffuse basis functions in the basis set (in °). Fm, Md, and No are shown in Figure S.4. [Lines are included as a visual aid and do not represent function continuity].

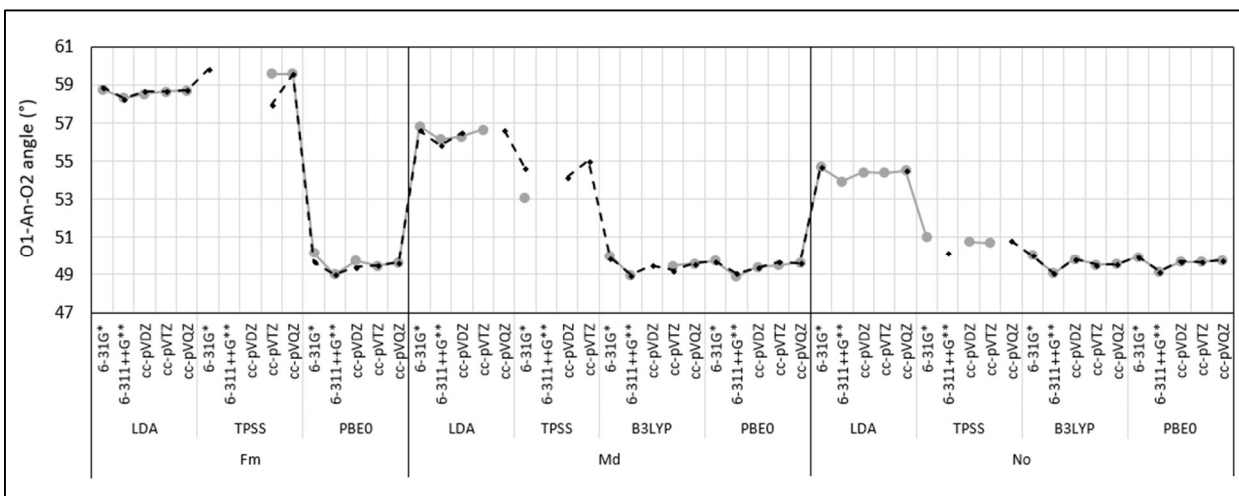

Figure S.5: Calculated O1-An-O2 angle in  $[An(NO_3)]^{+2}$  for Fm, Md, and No with LDA, TPSS, B3LYP, and PBE0 functionals, the 6-31G\*, cc-pVDZ, 6-311++G\*\*, cc-pVTZ, and cc-pVQZ basis set for N and O atoms, and the Stuttgart RSC 1997 ECP and basis set including all diffuse basis functions in the basis set (in °). [Lines are included as a visual aid and do not represent function continuity].

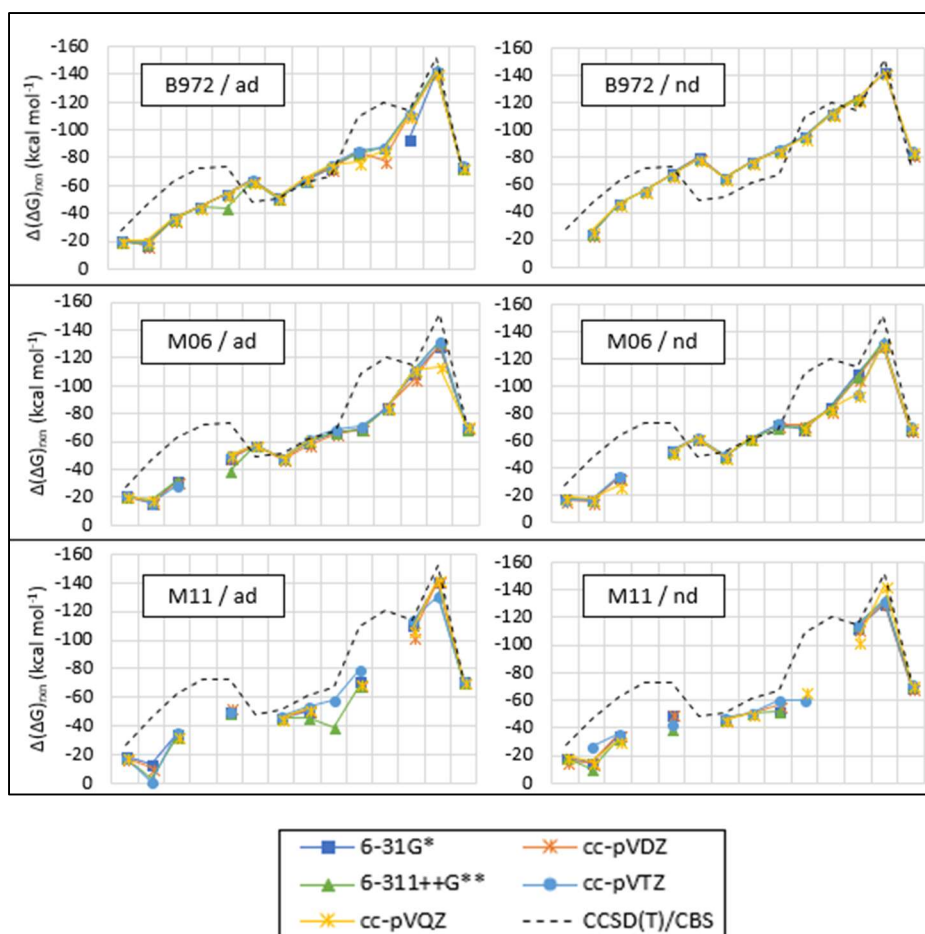

Figure S.6:  $\Delta(\Delta G)_{rxn}$  for  $[An(NO_3)_2]^{2+}$  normalized to Ac calculated with B972, M06, and M11 with the Stuttgart RSC 1997 ECP and basis set including (ad) and excluding (nd) the most diffuse basis functions for An, and the 6-31G\*, cc-pVDZ, 6-311++G\*\*, cc-pVTZ, and cc-pVQZ for N and O.  $\Delta(\Delta G)_{rxn}$  calculated with CCSD(T)-FC1, the cc-pV $\infty$ Z-X2C basis set for An, and the cc-pV $\infty$ Z-DK basis set for N and O is included as reference (indicated as CCSD(T)/CBS in labels). Values reported in kcal mol<sup>-1</sup>. [ $\Delta(\Delta G)_{rxn} = \Delta G_{rxn,An} - \Delta G_{rxn,Ac}$ , as indicated in Eq. 5.a; with An = Th - Lr]. The lines are included as a visual aid, and do not represent function continuity.

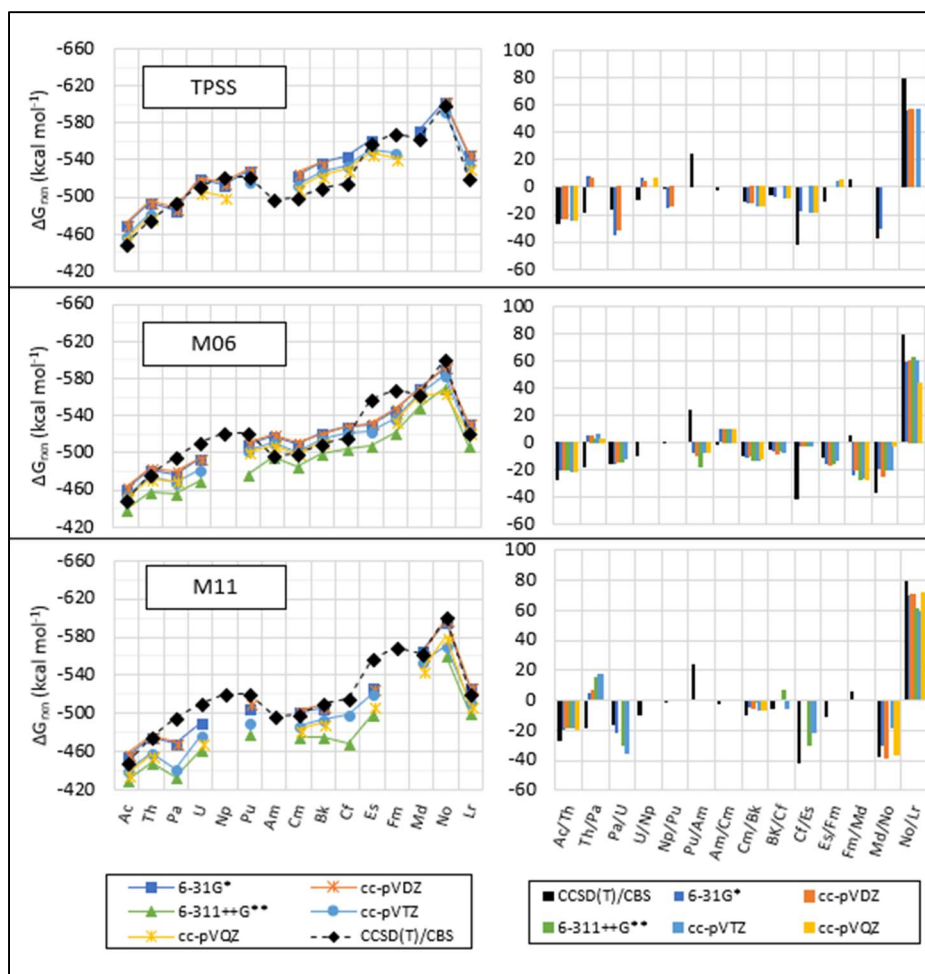

Figure S.7: Calculated  $\Delta G_{rxn}$  (left) and difference between contiguous actinides (right) for  $[An(NO_3)_2]^{2+}$  [with  $An = Ac$  to  $Lr$ ] with B972, M06, and M11, the Stuttgart RSC 1997 ECP and associated basis set including all diffuse functions for  $An$ , and the 6-31G\*, cc-pVDZ, 6-311++G\*\*, cc-pVTZ, and cc-pVQZ for N and O; and CCSD(T)-FC1/cc-pV $\infty$ Z-X2C:cc-pV $\infty$ Z-DK (indicated as CCSD(T)/CBS in labels). Values reported in kcal mol $^{-1}$ .  $[\Delta(\Delta G)_{rxn, An1/An2} = \Delta G_{rxn, An2} - \Delta G_{rxn, An1}]$  with  $An = Ac - Lr$ .

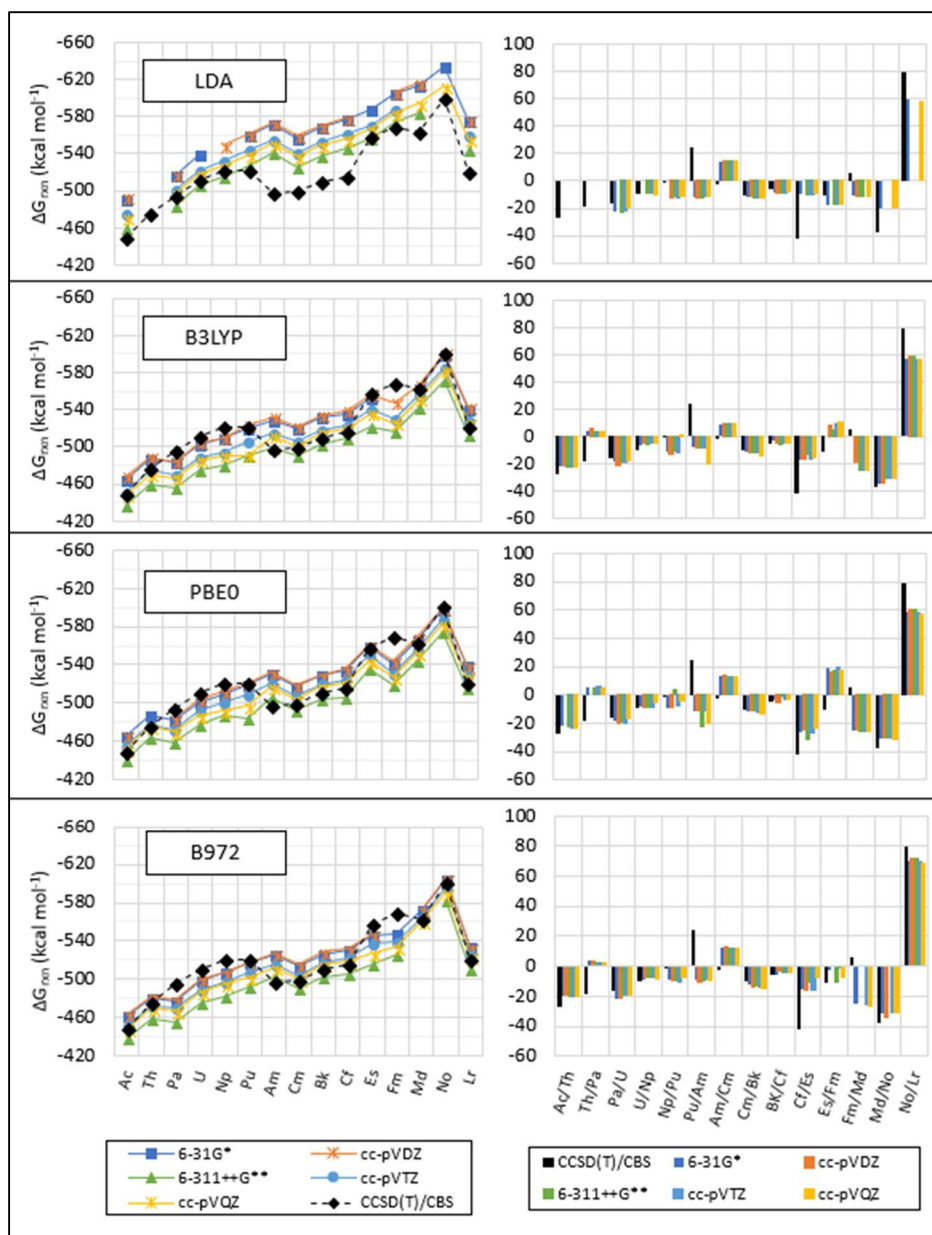

Figure S.8: Calculated  $\Delta G_{\text{rxn}}$  (left) and difference between contiguous actinides (right) for  $[\text{An}(\text{NO}_3)]^{2+}$  [with An = Ac to Lr] with LDA, B3LYP, PBE0, and B972, the Stuttgart RSC 1997 ECP and associated basis set excluding the most diffuse functions in the basis set for An, and the 6-31G\*, cc-pVDZ, 6-311++G\*\*, cc-pVTZ, and cc-pVQZ for N and O; and CCSD(T)-FC1/cc-pV $\infty$ Z-X2C:cc-pV $\infty$ Z-DK (indicated as CCSD(T)/CBS in labels). Values reported in kcal mol<sup>-1</sup>. [ $\Delta(\Delta G)_{\text{rxn, An1/An2}} = \Delta G_{\text{rxn, An2}} - \Delta G_{\text{rxn, An1}}$ ; with An = Ac - Lr].

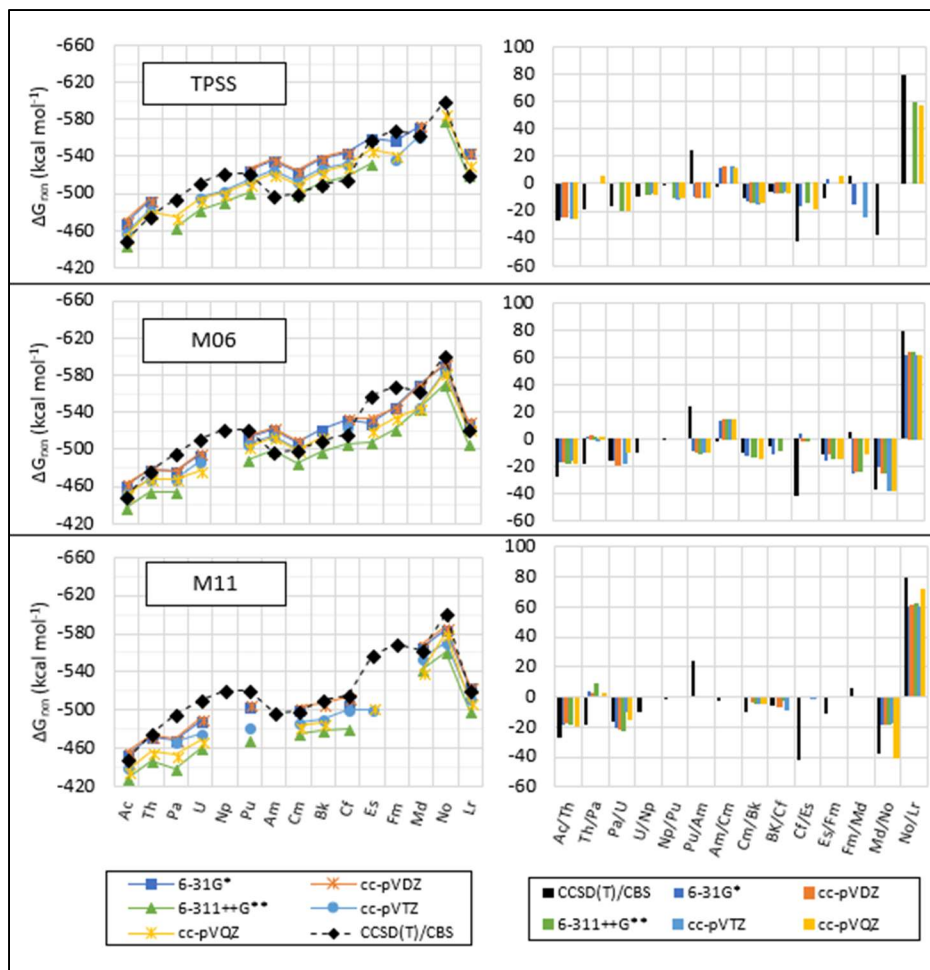

Figure S.9: Calculated  $\Delta G_{\text{rxn}}$  (left) and difference between contiguous actinides (right) for  $[\text{An}(\text{NO}_3)_2]^{2+}$  [with An = Ac to Lr] with TPSS, M06, and M11, the Stuttgart RSC 1997 ECP and associated basis set excluding most diffuse functions in the basis set for An, and the 6-31G\*, cc-pVDZ, 6-311++G\*\*, cc-pVTZ, and cc-pVQZ for N and O; and CCSD(T)-FC1/cc-pV $\infty$ Z-X2C:cc-pV $\infty$ Z-DK (indicated as CCSD(T)/CBS in labels). Values reported in kcal mol<sup>-1</sup>.  $[\Delta(\Delta G)_{\text{rxn}}]_{\text{An1}/\text{An2}} = \Delta G_{\text{rxn},\text{An2}} - \Delta G_{\text{rxn},\text{An1}}$ , with An = Ac - Lr].



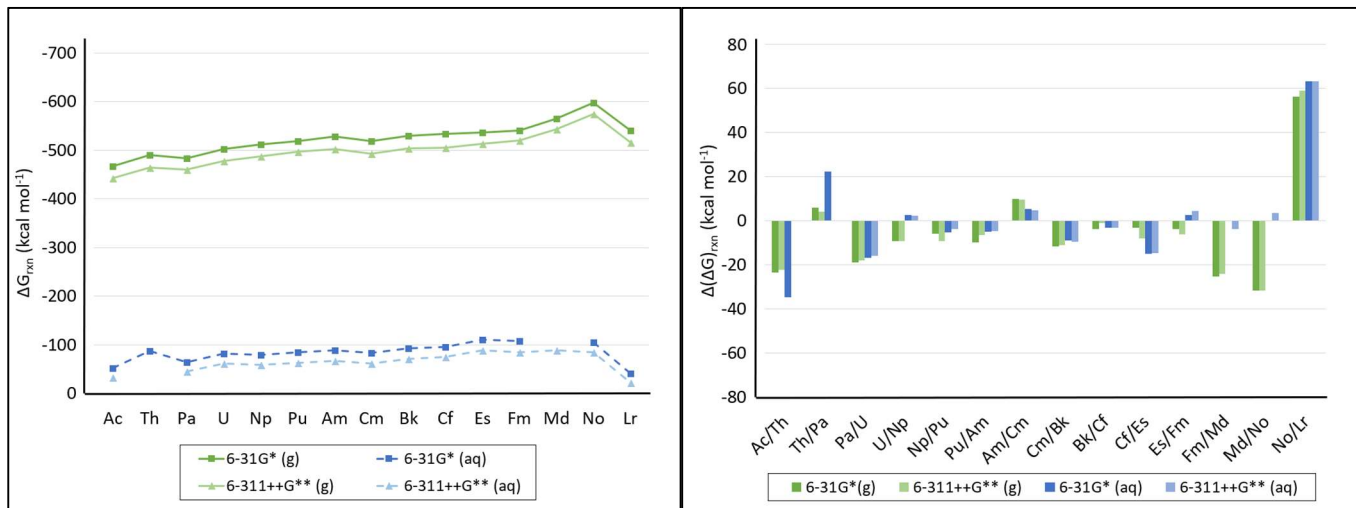

Figure S.10:  $\Delta G_{rxn}$  for  $[\text{An}(\text{NO}_3)_2]^{2+}$  calculated with the PBE0 functional, the Stuttgart RSC 1997 ECP including all diffuse basis functions in the An basis set, and the 6-31G\* and 6-311++G\*\* basis set for N and O (right), with differences between contiguous actinides (left). Values reported in kcal mol<sup>-1</sup>. [Lines are included as a visual aid and do not represent function continuity.]

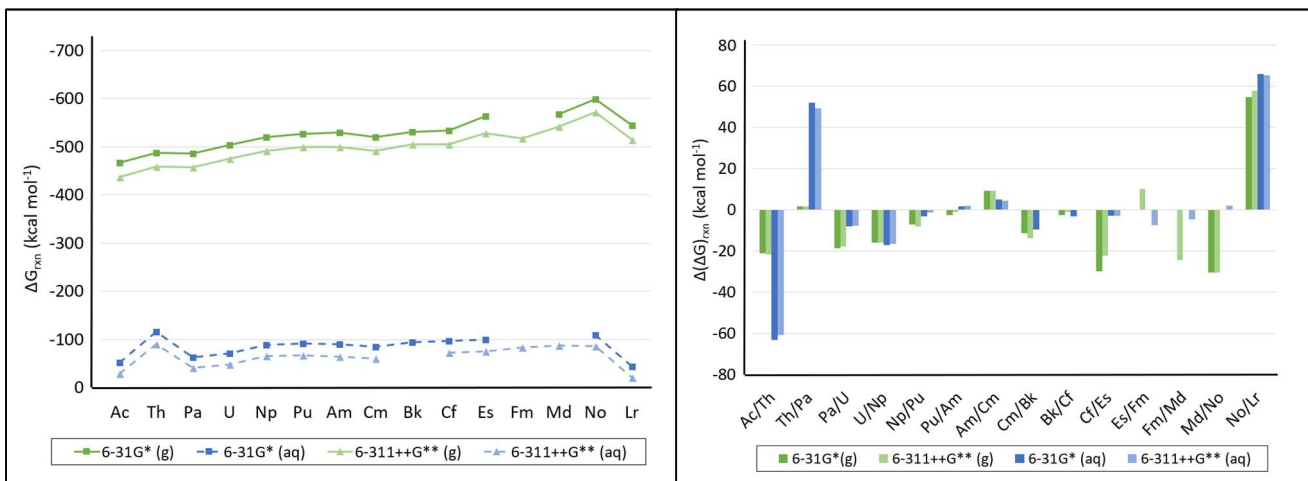

Figure S.11:  $\Delta G_{rxn}$  for  $[\text{An}(\text{NO}_3)_2]^{2+}$  calculated with the B3LYP functional, the Stuttgart RSC 1997 ECP including all diffuse basis functions in the An basis set, and the 6-31G\* and 6-311++G\*\* basis set for N and O (right), with differences between contiguous actinides (left). Values reported in kcal mol<sup>-1</sup>. [Lines are included as a visual aid and do not represent function continuity.]

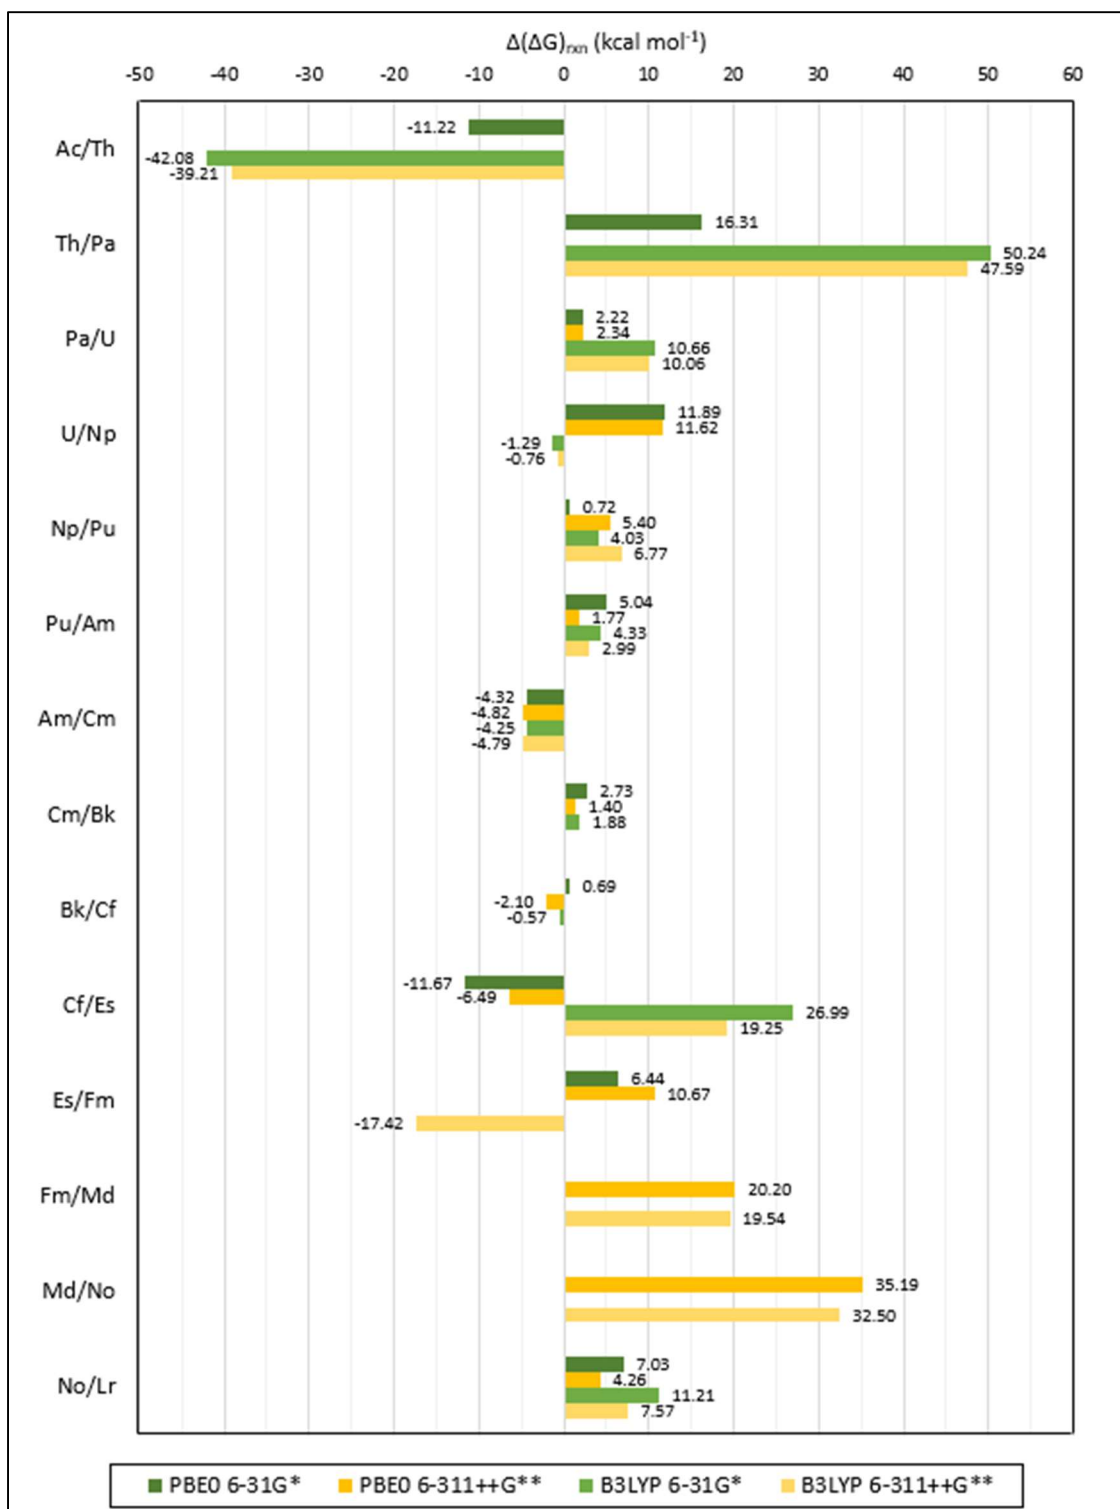

Figure S.12: Difference in predicted  $\Delta G_{rxn}$  for  $[An(NO_3)]^{2+}$  amongst contiguous actinides in gas and aqueous phase calculated with the B3LYP and PBE0 functional, the Stuttgart RSC 1997 ECP including all diffuse basis functions in the An basis set, and the 6-31G\* and 6-311++G\*\* basis set for N and O. Values reported in kcal mol<sup>-1</sup>. [Calculated as  $\Delta(\Delta G)_{rxn}$  between contiguous actinides (aq) -  $\Delta(\Delta G)_{rxn}$  between contiguous actinides (g).]

Table S.1: Differences in An partial charge predicted with NBO including (ad) and excluding (nd) the most diffuse basis functions in the bob-An basis sets. [Calculated as ad - nd].

| Functional | Non-An Basis Set | Ac    | Th    | Pa    | U     | Np    | Pu    | Am   | Cm   | Bk    | Cf    | Es    | Fm    | Md    | No   | Lr   |
|------------|------------------|-------|-------|-------|-------|-------|-------|------|------|-------|-------|-------|-------|-------|------|------|
| LDA        | 6-31G*           | 0.00  | -     | -0.01 | 0.00  | -     | 0.00  | 0.00 | 0.00 | 0.00  | 0.00  | 0.00  | 0.00  | -0.01 | 0.00 | 0.00 |
|            | cc-pVDZ          | 0.00  | -     | 0.01  | -     | 0.00  | 0.00  | -    | 0.00 | 0.00  | 0.00  | -     | 0.00  | 0.01  | -    | 0.00 |
|            | 6-311++G**       | -0.01 | -     | -0.02 | 0.00  | 0.00  | 0.00  | -    | 0.00 | 0.00  | 0.00  | 0.00  | 0.00  | -0.01 | -    | 0.00 |
|            | cc-pVTZ          | 0.00  | -     | 0.00  | 0.01  | 0.00  | 0.00  | 0.00 | 0.00 | 0.00  | 0.00  | 0.00  | 0.00  | -     | -    | 0.00 |
|            | cc-pVQZ          | 0.00  | 0.00  | 0.00  | -0.01 | 0.01  | 0.00  | 0.00 | 0.00 | 0.00  | 0.00  | 0.00  | 0.00  | -     | 0.00 | 0.00 |
| TPSS       | 6-31G*           | 0.00  | 0.00  | -     | -     | -     | 0.00  | -    | 0.00 | 0.00  | 0.00  | 0.02  | -     | -0.11 | -    | 0.00 |
|            | cc-pVDZ          | 0.00  | 0.00  | -     | -     | -     | 0.00  | -    | 0.00 | 0.01  | -     | -     | -     | -     | -    | 0.00 |
|            | 6-311++G**       | -     | -     | -     | -     | -     | -     | -    | -    | -     | -     | -     | -     | -     | -    | -    |
|            | cc-pVTZ          | 0.00  | 0.00  | -     | -     | -     | 0.00  | -    | 0.00 | -0.01 | 0.00  | -     | 0.03  | -     | -    | -    |
|            | cc-pVQZ          | 0.00  | 0.00  | -     | 0.00  | 0.00  | -     | -    | 0.00 | 0.00  | 0.00  | 0.00  | 0.00  | -     | -    | 0.00 |
| B3LYP      | 6-31G*           | 0.00  | 0.00  | 0.00  | 0.00  | -0.01 | 0.01  | 0.00 | 0.00 | 0.00  | -0.01 | 0.01  | -     | -0.01 | 0.00 | 0.00 |
|            | cc-pVDZ          | 0.00  | 0.00  | -0.01 | 0.00  | 0.00  | 0.00  | 0.00 | 0.00 | 0.00  | 0.01  | -0.01 | -     | -     | 0.00 | 0.00 |
|            | 6-311++G**       | 0.00  | -0.01 | 0.00  | 0.00  | -0.01 | 0.00  | 0.00 | 0.00 | 0.00  | -0.01 | 0.01  | 0.00  | 0.00  | 0.00 | 0.00 |
|            | cc-pVTZ          | 0.00  | -0.01 | 0.00  | 0.00  | 0.01  | 0.00  | 0.00 | 0.00 | 0.00  | 0.00  | -0.01 | 0.00  | 0.01  | 0.00 | 0.00 |
|            | cc-pVQZ          | 0.00  | 0.01  | -0.01 | 0.00  | 0.02  | -0.01 | 0.00 | 0.00 | 0.00  | 0.00  | 0.02  | 0.00  | 0.01  | 0.00 | 0.00 |
| PBE0       | 6-31G*           | 0.00  | 0.00  | 0.00  | -0.01 | 0.01  | 0.01  | 0.00 | 0.00 | 0.00  | 0.00  | -0.01 | 0.03  | 0.00  | 0.00 | 0.00 |
|            | cc-pVDZ          | 0.00  |       | 0.00  | 0.00  | -0.01 | -0.01 | 0.00 | 0.00 | 0.00  | 0.00  | 0.01  | 0.02  | 0.00  | 0.00 | 0.00 |
|            | 6-311++G**       | -0.01 | 0.00  | 0.00  | 0.00  | 0.00  | -0.05 | 0.00 | 0.00 | 0.00  | 0.00  | 0.00  | 0.00  | 0.01  | 0.00 | 0.00 |
|            | cc-pVTZ          | 0.00  | 0.00  | 0.01  | 0.00  | 0.00  | 0.00  | 0.00 | 0.00 | 0.00  | 0.00  | 0.00  | 0.00  | 0.01  | 0.00 | 0.00 |
|            | cc-pVQZ          | 0.00  | 0.00  | 0.00  | -0.01 | -0.01 | -0.03 | 0.00 | 0.00 | 0.00  | 0.00  | -0.01 | 0.00  | 0.00  | 0.00 | 0.00 |
| B972       | 6-31G*           | 0.00  | 0.00  | 0.00  | 0.00  | 0.00  | 0.00  | 0.00 | 0.00 | 0.00  | 0.01  | 0.00  | -     | -0.01 | 0.00 | 0.00 |
|            | cc-pVDZ          | 0.00  | 0.00  | 0.00  | 0.00  | 0.01  | 0.00  | 0.00 | 0.00 | 0.00  | 0.00  | 0.00  | -     | -0.01 | 0.00 | 0.00 |
|            | 6-311++G**       | -0.01 | 0.00  | 0.00  | 0.00  | 0.01  | 0.05  | 0.00 | 0.00 | 0.00  | 0.00  | 0.02  | 0.00  | -     | 0.00 | 0.00 |
|            | cc-pVTZ          | 0.00  | 0.00  | 0.00  | 0.00  | 0.00  | 0.00  | 0.00 | 0.00 | 0.01  | 0.00  | 0.00  | -0.01 | 0.00  | 0.00 | 0.00 |
|            | cc-pVQZ          | 0.00  | 0.00  | 0.00  | 0.00  | -0.01 | -0.01 | 0.00 | 0.00 | 0.00  | 0.00  | 0.00  | 0.00  | 0.01  | 0.00 | 0.00 |
| M06        | 6-31G*           | 0.00  | 0.00  | 0.00  | 0.00  | -     | 0.00  | 0.00 | 0.00 | 0.00  | 0.00  | 0.00  | 0.00  | 0.00  | 0.00 | 0.00 |
|            | cc-pVDZ          | 0.00  | 0.00  | 0.00  | 0.01  | -     | -0.01 | 0.00 | 0.00 | -     | 0.00  | 0.00  | -0.01 | 0.00  | 0.00 | 0.00 |
|            | 6-311++G**       | -0.01 | 0.00  | 0.00  | -     | -     | 0.02  | 0.00 | 0.00 | 0.00  | 0.00  | 0.00  | -0.01 | 0.00  | 0.00 | 0.00 |
|            | cc-pVTZ          | 0.00  | 0.00  | 0.03  | 0.00  | -     | 0.00  | 0.00 | 0.00 | -     | 0.00  | -     | -     | 0.01  | 0.00 | 0.00 |
|            | cc-pVQZ          | 0.00  | 0.00  | 0.00  | -     | -     | 0.01  | 0.00 | 0.00 | 0.00  | -     | -     | 0.00  | 0.01  | 0.00 | 0.00 |
| M11        | 6-31G*           | 0.00  | 0.00  | 0.01  | 0.00  | -     | 0.00  | -    | 0.00 | -     | -     | -     | -     | 0.00  | 0.00 | 0.00 |
|            | cc-pVDZ          | 0.00  | 0.01  | 0.01  | -     | -     | 0.00  | -    | 0.00 | 0.00  | -     | -     | -     | 0.00  | 0.00 | 0.00 |
|            | 6-311++G**       | 0.00  | 0.00  | 0.00  | 0.00  | -     | -0.04 | -    | 0.00 | 0.00  | 0.04  | -     | -     | -     | 0.00 | 0.00 |
|            | cc-pVTZ          | 0.00  | -     | 0.00  | 0.00  | -     | -0.03 | -    | 0.00 | 0.00  | -0.01 | 0.01  | -     | 0.00  | 0.00 | 0.00 |
|            | cc-pVQZ          | 0.00  | 0.00  | -     | 0.00  | -     | -     | -    | 0.00 | 0.00  | -     | 0.02  | -     | 0.00  | 0.00 | 0.00 |

Table S.2: Differences in An partial charge predicted with Mulliken including (ad) and excluding (nd) the most diffuse basis functions in the bob-An basis sets. [Calculated as ad - nd].

| Functional | Non-An Basis Set | Ac    | Th    | Pa    | U     | Np    | Pu    | Am    | Cm    | Bk    | Cf    | Es    | Fm    | Md    | No    | Lr    |
|------------|------------------|-------|-------|-------|-------|-------|-------|-------|-------|-------|-------|-------|-------|-------|-------|-------|
| LDA        | 6-31G*           | -0.02 | -     | -0.02 | 0.00  |       | -0.01 | 0.00  | -0.01 | -0.01 | 0.00  | 0.00  | -0.03 | -0.01 | 0.00  | -0.03 |
|            | cc-pVDZ          | -0.03 | -     | -0.01 |       | -0.01 | -0.01 | -     | -0.01 | 0.00  | -0.01 | -     | -0.04 | 0.01  | -     | -0.07 |
|            | 6-311++G**       | -0.14 | -     | -0.02 | -0.01 | -0.01 | -0.03 | -     | -0.04 | 0.00  | 0.00  | 0.00  | -0.28 | -0.02 | -     | -0.06 |
|            | cc-pVTZ          | -0.02 | -     | -0.01 | 0.01  | 0.00  | 0.00  | 0.00  | 0.00  | 0.00  | 0.00  | -0.01 | -0.02 | -     | -     | -0.04 |
|            | cc-pVQZ          | -0.02 | -     | -0.01 | 0.00  | 0.00  | 0.00  | 0.00  | 0.00  | 0.00  | 0.00  | -0.01 | -0.03 | -     | 0.00  | -0.03 |
| TPSS       | 6-31G*           | -0.01 | -0.03 | -     | -     | -     | -0.01 | -     | -0.01 | -0.01 | 0.00  | 0.00  | -     | -0.06 | -     | -0.02 |
|            | cc-pVDZ          | -0.03 | -0.05 | -     | -     | -     | -0.01 | -     | -0.01 | 0.00  | -     | -     | -     | -     | -     | -0.05 |
|            | 6-311++G**       | -     | -     | -     | -     | -     | -     | -     | -     | -     | -     | -     | -     | -     | -     | -     |
|            | cc-pVTZ          | -0.02 | -0.04 | -     | -     | -     | 0.00  | -     | 0.00  | -0.01 | -0.01 | -     | -0.01 | -     | -     | -     |
|            | cc-pVQZ          | -0.03 | -0.03 | -     | -0.01 | 0.00  | -     | -     | 0.00  | 0.00  | -0.01 | -0.01 | -0.03 | -     | -     | -0.03 |
| B3LYP      | 6-31G*           | -0.02 | -0.05 | -0.01 | 0.00  | -0.01 | -0.01 | -0.01 | -0.01 | -0.01 | -0.01 | 0.00  | -     | -0.01 | -0.01 | -0.04 |
|            | cc-pVDZ          | -0.03 | -0.07 | -0.01 | 0.00  | 0.00  | -0.02 | -0.01 | -0.02 | -0.01 | 0.00  | -0.01 | -     | -     | -0.01 | -0.06 |
|            | 6-311++G**       | -0.14 | -0.24 | -0.01 | 0.00  | -0.01 | -0.04 | -0.03 | -0.03 | 0.00  | -0.01 | 0.01  | -0.18 | 0.00  | 0.00  | -0.07 |
|            | cc-pVTZ          | -0.03 | -0.05 | -0.01 | 0.00  | 0.00  | 0.00  | -0.01 | 0.00  | -0.01 | 0.00  | -0.01 | -0.03 | 0.00  | 0.00  | -0.05 |
|            | cc-pVQZ          | -0.02 | -0.02 | -0.01 | -0.01 | 0.00  | 0.00  | 0.00  | 0.00  | 0.00  | -0.01 | 0.02  | -0.03 | 0.02  | 0.00  | -0.04 |
| PBE0       | 6-31G*           | -0.01 | -0.03 | -0.01 | -0.01 | 0.01  | -0.01 | -0.01 | -0.01 | -0.01 | -0.01 | -0.01 | 0.01  | 0.01  | 0.00  | -0.02 |
|            | cc-pVDZ          | -0.03 | -     | -0.01 | 0.00  | -0.01 | -0.01 | -0.01 | -0.01 | -0.01 | -0.01 | 0.00  | -0.03 | 0.00  | 0.00  | -0.05 |
|            | 6-311++G**       | -0.13 | -0.23 | 0.00  | 0.00  | 0.00  | -0.04 | -0.04 | -0.03 | 0.00  | 0.00  | 0.00  | -0.19 | 0.01  | 0.00  | -0.06 |
|            | cc-pVTZ          | -0.02 | -0.04 | 0.00  | 0.00  | -0.01 | 0.00  | 0.00  | 0.00  | 0.00  | 0.00  | 0.00  | -0.03 | 0.01  | 0.00  | -0.04 |
|            | cc-pVQZ          | -0.02 | -0.02 | 0.00  | 0.00  | -0.01 | -0.01 | 0.00  | 0.00  | 0.00  | -0.01 | -0.01 | -0.03 | 0.01  | 0.00  | -0.03 |
| B972       | 6-31G*           | -0.02 | -0.02 | -0.01 | 0.00  | 0.00  | 0.00  | 0.00  | 0.00  | 0.00  | 0.00  | -0.01 | -     | -0.02 | 0.00  | -0.02 |
|            | cc-pVDZ          | -0.02 | -0.05 | -0.01 | 0.00  | 0.01  | 0.00  | -0.01 | -0.01 | 0.00  | 0.00  | -0.01 | -     | 0.00  | 0.00  | -0.05 |
|            | 6-311++G**       | -0.14 | -0.22 | -0.01 | -0.01 | 0.00  | -0.02 | -0.03 | -0.03 | 0.00  | -0.01 | -0.01 | -0.19 | -     | 0.00  | -0.06 |
|            | cc-pVTZ          | -0.02 | -0.04 | 0.00  | 0.00  | 0.00  | -0.01 | 0.00  | 0.00  | 0.00  | 0.00  | 0.00  | -0.04 | 0.00  | 0.00  | -0.04 |
|            | cc-pVQZ          | -0.02 | -0.03 | -0.01 | -0.01 | -0.01 | 0.00  | 0.00  | 0.00  | 0.00  | 0.00  | 0.00  | -0.03 | 0.01  | 0.00  | -0.04 |
| M06        | 6-31G*           | -0.01 | -0.03 | -0.01 | 0.00  | -     | -0.01 | 0.00  | -0.01 | 0.00  | 0.00  | 0.00  | -0.01 | 0.01  | 0.00  | -0.01 |
|            | cc-pVDZ          | -0.02 | -0.05 | -0.01 | 0.01  | -     | -0.01 | -0.01 | -0.01 | -     | -0.01 | 0.00  | -0.04 | 0.00  | 0.00  | -0.05 |
|            | 6-311++G**       | -0.14 | -0.26 | -0.01 | -     | -     | -0.03 | -0.03 | -0.03 | 0.00  | -0.01 | 0.01  | -0.21 | 0.00  | 0.00  | -0.08 |
|            | cc-pVTZ          | -0.01 | -0.02 | 0.01  | 0.00  | -     | 0.00  | 0.01  | 0.00  | -     | -0.01 | -     | -     | 0.00  | 0.00  | -0.02 |
|            | cc-pVQZ          | -0.02 | -0.02 | -0.01 | -     | -     | 0.00  | 0.00  | 0.01  | -0.01 | -     | -     | -0.04 | 0.01  | 0.00  | -0.03 |
| M11        | 6-31G*           | -0.01 | -0.04 | -0.01 | 0.00  | -     | -0.01 | -     | -0.01 | -     | -     | -     | -     | -0.01 | 0.00  | -0.03 |
|            | cc-pVDZ          | -0.03 | -0.06 | 0.00  | -     | -     | -0.01 | -     | -0.02 | 0.00  | -     | -     | -     | -0.01 | 0.00  | -0.07 |
|            | 6-311++G**       | -0.17 | -0.32 | 0.00  | -0.01 | -     | -0.03 | -     | -0.03 | -0.01 | 0.02  | -     | -     | -     | 0.01  | -0.11 |
|            | cc-pVTZ          | -0.02 | -     | -0.02 | -0.01 | -     | 0.00  | -     | 0.01  | 0.01  | -0.01 | 0.00  | -     | 0.00  | 0.00  | -0.03 |
|            | cc-pVQZ          | -0.03 | -0.02 | -     | 0.00  | -     | -     | -     | 0.00  | 0.01  | -     | 0.01  | -     | 0.00  | 0.00  | -0.03 |

Table S.3: Differences in An partial charge predicted with Lowdin including (ad) and excluding (nd) the most diffuse basis functions in the bob-An basis sets. [Calculated as ad - nd].

| Functional | Non-An Basis Set | Ac    | Th    | Pa    | U     | Np    | Pu    | Am    | Cm    | Bk    | Cf    | Es    | Fm    | Md    | No    | Lr    |
|------------|------------------|-------|-------|-------|-------|-------|-------|-------|-------|-------|-------|-------|-------|-------|-------|-------|
| LDA        | 6-31G*           | -0.14 | -     | -0.05 | -0.01 | -     | -0.12 | -0.22 | -0.13 | -0.01 | -0.01 | -0.01 | -0.31 | -0.04 | -0.01 | -0.31 |
|            | cc-pVDZ          | -0.11 | -     | -0.03 | -     | 0.00  | -0.09 | -     | -0.09 | -0.01 | -0.01 | -     | -0.23 | 0.01  | -     | -0.22 |
|            | 6-311++G**       | -0.08 | -     | -0.03 | 0.00  | 0.00  | -0.08 | -     | -0.08 | -0.01 | 0.00  | 0.00  | -0.21 | -0.03 | -     | -0.20 |
|            | cc-pVTZ          | -0.10 | -     | -0.03 | -0.01 | 0.00  | -0.08 | -0.15 | -0.09 | -0.01 | -0.01 | -0.01 | -0.22 | -     | -     | -0.22 |
|            | cc-pVQZ          | -0.09 | -     | -0.02 | -0.01 | -0.01 | -0.08 | -0.14 | -0.08 | -0.01 | 0.00  | 0.00  | -0.21 | -     | 0.00  | -0.19 |
| TPSS       | 6-31G*           | -0.13 | -0.37 | -     | -     | -     | -0.12 | -     | -0.14 | -0.01 | -0.01 | 0.00  | -     | -0.01 | -     | -0.30 |
|            | cc-pVDZ          | -0.11 | -0.27 | -     | -     | -     | -0.09 | -     | -0.10 | 0.01  | -     | -     | -     | -     | -     | -0.21 |
|            | 6-311++G**       | -     | -     | -     | -     | -     | -     | -     | -     | -     | -     | -     | -     | -     | -     | -     |
|            | cc-pVTZ          | -0.10 | -0.26 | -     | -     | -     | -0.09 | -     | -0.09 | -0.01 | 0.00  | -     | -0.23 | -     | -     | -     |
|            | cc-pVQZ          | -0.10 | -0.25 | -     | 0.00  | 0.00  | -     | -     | -0.08 | -0.01 | -0.01 | 0.00  | -0.20 | -     | -     | -0.18 |
| B3LYP      | 6-31G*           | -0.14 | -0.38 | -0.03 | -0.01 | -0.02 | -0.12 | -0.22 | -0.14 | -0.01 | -0.02 | 0.00  | -     | -0.02 | -0.01 | -0.31 |
|            | cc-pVDZ          | -0.11 | -0.28 | -0.04 | -0.01 | -0.01 | -0.10 | -0.17 | -0.10 | -0.01 | 0.00  | -0.01 | -     | -     | -0.01 | -0.22 |
|            | 6-311++G**       | -0.09 | -0.26 | -0.02 | -0.01 | -0.02 | -0.07 | -0.14 | -0.09 | -0.01 | 0.00  | 0.02  | -0.20 | 0.00  | 0.00  | -0.20 |
|            | cc-pVTZ          | -0.11 | -0.29 | -0.02 | -0.01 | 0.00  | -0.09 | -0.16 | -0.10 | -0.01 | 0.00  | -0.02 | -0.21 | 0.00  | 0.00  | -0.22 |
|            | cc-pVQZ          | -0.09 | -0.24 | -0.03 | -0.01 | 0.01  | -0.08 | -0.14 | -0.08 | 0.00  | -0.01 | 0.01  | -0.19 | 0.01  | 0.00  | -0.20 |
| PBE0       | 6-31G*           | -0.14 | -0.37 | -0.03 | -0.03 | 0.00  | -0.11 | -0.21 | -0.13 | -0.01 | 0.00  | -0.01 | -0.29 | -0.01 | -0.01 | -0.30 |
|            | cc-pVDZ          | -0.10 | -     | -0.03 | -0.01 | -0.01 | -0.10 | -0.16 | -0.10 | 0.00  | -0.01 | 0.00  | -0.21 | -0.01 | -0.01 | -0.21 |
|            | 6-311++G**       | -0.08 | -0.25 | -0.01 | -0.01 | 0.00  | -0.13 | -0.14 | -0.09 | -0.01 | 0.00  | 0.00  | -0.19 | 0.00  | -0.01 | -0.20 |
|            | cc-pVTZ          | -0.10 | -0.27 | -0.02 | -0.01 | 0.00  | -0.09 | -0.15 | -0.09 | 0.00  | 0.00  | -0.01 | -0.20 | 0.00  | -0.01 | -0.21 |
|            | cc-pVQZ          | -0.09 | -0.25 | -0.02 | -0.01 | -0.02 | -0.10 | -0.14 | -0.08 | -0.01 | 0.00  | -0.01 | -0.18 | -0.01 | 0.00  | -0.18 |
| B972       | 6-31G*           | -0.13 | -0.36 | -0.04 | -0.01 | -0.01 | -0.13 | -0.21 | -0.14 | -0.01 | 0.01  | -0.01 | -     | -0.04 | -0.01 | -0.30 |
|            | cc-pVDZ          | -0.11 | -0.28 | -0.03 | -0.01 | 0.00  | -0.10 | -0.16 | -0.09 | -0.01 | -0.01 | 0.00  | -     | -0.01 | -0.01 | -0.21 |
|            | 6-311++G**       | -0.08 | -0.26 | -0.01 | -0.01 | 0.01  | -0.03 | -0.14 | -0.08 | -0.01 | -0.01 | -0.03 | -0.18 | -     | 0.00  | -0.20 |
|            | cc-pVTZ          | -0.10 | -0.27 | -0.02 | -0.01 | -0.01 | -0.08 | -0.15 | -0.09 | 0.00  | 0.00  | -0.01 | -0.20 | -0.01 | -0.01 | -0.20 |
|            | cc-pVQZ          | -0.09 | -0.24 | -0.02 | -0.01 | -0.01 | -0.07 | -0.14 | -0.07 | -0.01 | -0.01 | -0.01 | -0.18 | 0.00  | 0.00  | -0.18 |
| M06        | 6-31G*           | -0.14 | -0.37 | -0.03 | -0.01 | -     | -0.12 | -0.22 | -0.13 | -0.01 | -0.01 | -0.01 | -0.30 | -0.01 | -0.01 | -0.30 |
|            | cc-pVDZ          | -0.10 | -0.27 | -0.02 | 0.01  | -     | -0.09 | -0.16 | -0.10 | -     | -0.01 | 0.01  | -0.22 | -0.01 | -0.01 | -0.21 |
|            | 6-311++G**       | -0.08 | -0.26 | -0.02 | -     | -     | -0.06 | -0.14 | -0.09 | -0.01 | -0.02 | 0.00  | -0.19 | -0.01 | 0.00  | -0.20 |
|            | cc-pVTZ          | -0.10 | -0.26 | 0.01  | 0.00  | -     | -0.08 | -0.15 | -0.08 | -     | -0.01 | -     | -     | 0.00  | -0.01 | -0.20 |
|            | cc-pVQZ          | -0.09 | -0.24 | -0.02 | -     | -     | -0.06 | -0.13 | -0.08 | 0.00  | -     | -     | -0.18 | 0.00  | -0.01 | -0.18 |
| M11        | 6-31G*           | -0.14 | -0.38 | -0.03 | -0.01 | -     | -0.11 | -     | -0.14 | -     | -     | -     | -     | -0.02 | -0.01 | -0.31 |
|            | cc-pVDZ          | -0.11 | -0.28 | -0.01 | -     | -     | -0.10 | -     | -0.10 | -0.01 | -     | -     | -     | -0.01 | -0.01 | -0.23 |
|            | 6-311++G**       | -0.09 | -0.26 | -0.02 | 0.00  | -     | -0.12 | -     | -0.09 | 0.00  | 0.05  | -     | -     | -     | 0.00  | -0.21 |
|            | cc-pVTZ          | -0.10 | -     | -0.03 | 0.00  | -     | -0.11 | -     | -0.10 | -0.01 | -0.01 | 0.00  | -     | -0.01 | -0.01 | -0.22 |
|            | cc-pVQZ          | -0.10 | -0.25 | -     | -0.01 | -     | -     | -     | -0.08 | -0.01 | -     | 0.01  | -     | -0.01 | -0.01 | -0.19 |

Table S.4 Predicted 5f orbital occupancies with NBO for An in proposed model for  $[An(NO_3)]^{2+}$  structure, with LDA, TPSS, B3LYP, and PBE0.

| Functional | An basis set (ad/nd) | Non-An basis set | Ac  | Th  | Pa  | U   | Np  | Pu  | Am  | Cm  | Bk  | Cf  | Es   | Fm   | Md   | No   | Lr   |
|------------|----------------------|------------------|-----|-----|-----|-----|-----|-----|-----|-----|-----|-----|------|------|------|------|------|
| LDA        | ad                   | 6-31G*           | 0.1 |     | 2.3 | 3.2 | 4.3 | 5.4 | 6.4 | 7.2 | 8.3 | 9.3 | 10.4 | 11.6 | 12.7 | 13.8 | 14.0 |
|            |                      | cc-pVDZ          | 0.1 |     | 2.3 |     | 4.3 | 5.3 |     | 7.2 | 8.3 | 9.4 |      | 11.6 | 12.7 | 13.8 | 14.0 |
|            |                      | 6-311++G**       | 0.1 |     | 2.3 | 3.2 | 4.3 | 5.3 |     | 7.2 | 8.3 | 9.4 | 10.4 | 11.6 | 12.7 | 13.8 | 14.0 |
|            |                      | cc-pVTZ          | 0.1 |     | 2.3 | 3.2 | 4.3 | 5.4 | 6.4 | 7.2 | 8.3 | 9.3 | 10.4 | 11.6 | 12.7 |      | 14.0 |
|            |                      | cc-pVQZ          | 0.1 |     | 2.3 | 3.2 | 4.3 | 5.4 | 6.4 | 7.2 | 8.3 | 9.3 | 10.4 | 11.6 |      | 13.8 | 14.0 |
|            | nd                   | 6-31G*           | 0.1 |     | 2.3 | 3.2 |     | 5.3 | 6.4 | 7.2 | 8.3 | 9.3 | 10.4 | 11.6 | 12.7 | 13.8 | 14.0 |
|            |                      | cc-pVDZ          | 0.1 |     | 2.3 |     | 4.3 | 5.3 | 6.4 | 7.2 | 8.3 | 9.4 |      | 11.6 | 12.7 |      | 14.0 |
|            |                      | 6-311++G**       | 0.1 |     | 2.3 | 3.2 | 4.3 | 5.3 | 6.4 | 7.2 | 8.3 | 9.4 | 10.4 | 11.6 | 12.7 |      | 14.0 |
|            |                      | cc-pVTZ          | 0.1 |     | 2.3 | 3.2 | 4.3 | 5.4 | 6.4 | 7.2 | 8.3 | 9.3 | 10.4 | 11.6 |      |      | 14.0 |
|            |                      | cc-pVQZ          | 0.1 |     | 2.3 | 3.2 | 4.3 | 5.3 | 6.4 | 7.2 | 8.3 | 9.3 | 10.4 | 11.6 | 12.7 | 13.8 | 14.0 |
| TPSS       | ad                   | 6-31G*           | 0.1 | 0.7 | 2.2 | 3.1 | 4.2 | 5.2 |     | 7.1 | 8.2 | 9.3 | 10.2 |      | 12.8 | 14.0 | 14.0 |
|            |                      | cc-pVDZ          | 0.1 | 0.7 | 2.2 | 3.1 | 4.2 | 5.2 |     | 7.1 | 8.2 |     | 10.4 |      |      | 14.0 | 14.0 |
|            |                      | cc-pVTZ          | 0.1 | 0.7 |     |     |     | 5.2 |     | 7.1 | 8.2 | 9.3 | 10.2 | 11.4 |      | 14.0 | 14.0 |
|            |                      | cc-pVQZ          | 0.1 | 0.7 |     | 3.1 | 4.2 |     |     | 7.1 | 8.2 | 9.3 | 10.2 | 11.4 |      |      | 14.0 |
|            |                      | 6-311++G**       | 0.1 | 0.7 |     |     |     | 5.2 | 6.4 | 7.1 | 8.2 | 9.3 | 10.3 | 11.4 | 12.7 |      | 14.0 |
|            | nd                   | cc-pVDZ          | 0.1 | 0.7 |     |     |     | 5.2 | 6.4 | 7.1 | 8.2 | 9.3 |      |      | 12.7 |      | 14.0 |
|            |                      | 6-311++G**       | 0.1 | 0.7 | 2.2 | 3.1 | 4.2 | 5.2 |     | 7.1 | 8.2 | 9.3 | 10.3 |      |      | 14.0 | 14.0 |
|            |                      | cc-pVTZ          | 0.1 | 0.7 |     | 3.1 | 4.2 | 5.2 | 6.4 | 7.1 | 8.2 | 9.3 |      | 11.4 | 12.7 |      |      |
|            |                      | cc-pVQZ          | 0.1 | 0.7 | 2.2 | 3.1 | 4.2 | 5.2 | 6.4 | 7.1 | 8.2 | 9.3 | 10.2 | 11.4 |      | 14.0 | 14.0 |
|            |                      | 6-31G*           | 0.1 | 0.7 | 2.2 | 3.1 | 4.2 | 5.2 | 6.3 | 7.1 | 8.2 | 9.2 | 10.2 |      | 13.0 | 14.0 | 14.0 |
| B3LYP      | ad                   | cc-pVDZ          | 0.1 | 0.7 | 2.2 | 3.1 | 4.1 | 5.2 | 6.3 | 7.1 | 8.2 | 9.2 | 10.2 |      |      | 14.0 | 14.0 |
|            |                      | 6-311++G**       | 0.1 | 0.7 | 2.2 | 3.1 | 4.2 | 5.2 | 6.3 | 7.1 | 8.2 | 9.2 | 10.2 | 12.0 | 13.0 | 14.0 | 14.0 |
|            |                      | cc-pVTZ          | 0.1 | 0.7 | 2.2 | 3.1 | 4.2 | 5.2 | 6.3 | 7.1 | 8.2 | 9.2 | 10.2 | 12.0 | 13.0 | 14.0 | 14.0 |
|            |                      | cc-pVQZ          | 0.1 | 0.7 | 2.2 | 3.1 | 4.1 | 5.2 | 6.3 | 7.1 | 8.2 | 9.2 | 10.2 | 12.0 | 13.0 | 14.0 | 14.0 |
|            |                      | 6-31G*           | 0.1 | 0.7 | 2.2 | 3.1 | 4.1 | 5.2 | 6.3 | 7.1 | 8.2 | 9.2 | 10.2 |      | 13.0 | 14.0 | 14.0 |
|            | nd                   | cc-pVDZ          | 0.1 | 0.7 | 2.2 | 3.1 | 4.2 | 5.2 | 6.3 | 7.1 | 8.2 | 9.2 | 10.2 | 12.0 | 13.0 | 14.0 | 14.0 |
|            |                      | 6-311++G**       | 0.1 | 0.7 | 2.2 | 3.1 | 4.1 | 5.2 | 6.3 | 7.1 | 8.2 | 9.2 | 10.2 | 12.0 | 13.0 | 14.0 | 14.0 |
|            |                      | cc-pVTZ          | 0.1 | 0.7 | 2.2 | 3.1 | 4.2 | 5.2 | 6.3 | 7.1 | 8.2 | 9.2 | 10.2 | 12.0 | 13.0 | 14.0 | 14.0 |
|            |                      | cc-pVQZ          | 0.1 | 0.7 | 2.2 | 3.1 | 4.2 | 5.2 | 6.3 | 7.1 | 8.2 | 9.2 | 10.2 | 12.0 | 13.0 | 14.0 | 14.0 |
|            |                      | 6-31G*           | 0.1 | 0.7 | 2.2 | 3.1 | 4.1 | 5.2 | 6.3 | 7.1 | 8.1 | 9.2 | 10.2 | 12.0 | 13.0 | 14.0 | 14.0 |
| PBE0       | ad                   | cc-pVDZ          | 0.1 | 0.7 | 2.2 | 3.1 | 4.2 | 5.2 | 6.3 | 7.1 | 8.2 | 9.2 | 10.2 | 12.0 | 13.0 | 14.0 | 14.0 |
|            |                      | 6-311++G**       | 0.1 | 0.7 | 2.2 | 3.1 | 4.1 | 5.2 | 6.3 | 7.1 | 8.2 | 9.1 | 10.2 | 12.0 | 13.0 | 14.0 | 14.0 |
|            |                      | cc-pVTZ          | 0.1 | 0.7 | 2.2 | 3.1 | 4.1 | 5.2 | 6.3 | 7.1 | 8.1 | 9.2 | 10.2 | 12.0 | 13.0 | 14.0 | 14.0 |
|            |                      | cc-pVQZ          | 0.1 | 0.6 | 2.2 | 3.1 | 4.1 | 5.2 | 6.3 | 7.1 | 8.2 | 9.2 | 10.2 | 12.0 | 13.0 | 14.0 | 14.0 |
|            |                      | 6-31G*           | 0.1 | 0.7 | 2.2 | 3.1 | 4.2 | 5.2 | 6.3 | 7.1 | 8.1 | 9.2 | 10.2 | 12.0 | 13.0 | 14.0 | 14.0 |
|            | nd                   | cc-pVDZ          | 0.1 |     | 2.2 | 3.1 | 4.1 | 5.2 | 6.3 | 7.1 | 8.2 | 9.2 | 10.2 | 12.0 | 13.0 | 14.0 | 14.0 |
|            |                      | 6-311++G**       | 0.1 | 0.7 | 2.2 | 3.1 | 4.1 | 5.1 | 6.3 | 7.1 | 8.2 | 9.1 | 10.2 | 12.0 | 13.0 | 14.0 | 14.0 |
|            |                      | cc-pVTZ          | 0.1 | 0.7 | 2.2 | 3.1 | 4.1 | 5.2 | 6.3 | 7.1 | 8.1 | 9.2 | 10.2 | 12.0 | 13.0 | 14.0 | 14.0 |
|            |                      | cc-pVQZ          | 0.1 | 0.7 | 2.2 | 3.1 | 4.1 | 5.1 | 6.3 | 7.1 | 8.2 | 9.2 | 10.2 | 12.0 | 13.0 | 14.0 | 14.0 |
|            |                      | 6-31G*           | 0.1 | 0.7 | 2.2 | 3.1 | 4.1 | 5.1 | 6.3 | 7.1 | 8.2 | 9.2 | 10.2 | 12.0 | 13.0 | 14.0 | 14.0 |

Table S.5: Predicted 5f orbital occupancies with NBO for An in proposed model for  $[\text{An}(\text{NO}_3)]^{2+}$  structure, with B972, M06, and M11.

| Functional | An basis set (ad/nd) | Non-An basis set | Ac  | Th  | Pa  | U   | Np  | Pu  | Am  | Cm  | Bk  | Cf  | Es   | Fm   | Md   | No   | Lr   |
|------------|----------------------|------------------|-----|-----|-----|-----|-----|-----|-----|-----|-----|-----|------|------|------|------|------|
| B972       | ad                   | 6-31G*           | 0.1 | 0.9 | 2.2 | 3.1 | 4.2 | 5.2 | 6.4 | 7.1 | 8.2 | 9.2 | 10.3 |      | 13.0 | 14.0 | 14.0 |
|            |                      | cc-pVDZ          | 0.1 | 0.9 | 2.2 | 3.1 | 4.2 | 5.2 | 6.4 | 7.1 | 8.2 | 9.2 | 10.3 | 12.0 | 13.0 | 14.0 | 14.0 |
|            |                      | 6-311++G**       | 0.1 | 0.9 | 2.2 | 3.1 | 4.2 | 5.1 | 6.4 | 7.1 | 8.2 | 9.2 | 10.2 | 12.0 | 13.0 | 14.0 | 14.0 |
|            |                      | cc-pVTZ          | 0.1 | 0.9 | 2.2 | 3.1 | 4.2 | 5.2 | 6.4 | 7.1 | 8.2 | 9.2 | 10.2 | 12.0 | 13.0 | 14.0 | 14.0 |
|            |                      | cc-pVQZ          | 0.1 | 0.9 | 2.2 | 3.1 | 4.2 | 5.2 | 6.3 | 7.1 | 8.2 | 9.2 | 10.2 | 12.0 | 13.0 | 14.0 | 14.0 |
|            | nd                   | 6-31G*           | 0.1 | 0.9 | 2.2 | 3.1 | 4.2 | 5.2 | 6.4 | 7.1 | 8.2 | 9.2 | 10.2 | 12.0 | 13.0 | 14.0 | 14.0 |
|            |                      | cc-pVDZ          | 0.1 | 0.9 | 2.2 | 3.1 | 4.2 | 5.2 | 6.4 | 7.1 | 8.2 | 9.2 | 10.2 |      | 13.0 | 14.0 | 14.0 |
|            |                      | 6-311++G**       | 0.1 | 0.9 | 2.2 | 3.1 | 4.2 | 5.2 | 6.4 | 7.1 | 8.2 | 9.2 | 10.3 | 12.0 |      | 14.0 | 14.0 |
|            |                      | cc-pVTZ          | 0.1 | 0.9 | 2.2 | 3.1 | 4.2 | 5.2 | 6.4 | 7.1 | 8.2 | 9.2 | 10.2 | 12.0 | 13.0 | 14.0 | 14.0 |
|            |                      | cc-pVQZ          | 0.1 | 0.9 | 2.2 | 3.1 | 4.2 | 5.2 | 6.3 | 7.1 | 8.2 | 9.2 | 10.2 | 12.0 | 13.0 | 14.0 | 14.0 |
| M06        | ad                   | 6-31G*           | 0.1 | 1.0 | 2.2 | 3.1 |     | 5.2 | 6.3 | 7.1 | 8.1 | 9.2 | 10.2 | 12.0 | 13.0 | 14.0 | 14.0 |
|            |                      | cc-pVDZ          | 0.1 | 1.0 | 2.2 | 3.1 |     | 5.2 | 6.3 | 7.1 | 8.1 | 9.2 | 10.2 | 12.0 | 13.0 | 14.0 | 14.0 |
|            |                      | 6-311++G**       | 0.1 | 1.0 | 2.2 | 3.1 |     | 5.1 | 6.3 | 7.1 | 8.2 | 9.2 | 10.2 | 12.0 | 13.0 | 14.0 | 14.0 |
|            |                      | cc-pVTZ          | 0.1 | 1.0 | 2.2 | 3.1 |     | 5.2 | 6.3 | 7.1 | 8.2 | 9.2 | 10.2 | 12.0 | 13.0 | 14.0 | 14.0 |
|            |                      | cc-pVQZ          | 0.1 | 1.0 | 2.2 |     |     | 5.2 | 6.3 | 7.1 | 8.2 |     |      | 12.0 | 13.0 | 14.0 | 14.0 |
|            | nd                   | 6-31G*           | 0.1 | 1.0 | 2.2 | 3.1 |     | 5.2 | 6.3 | 7.1 | 8.1 | 9.2 | 10.2 | 12.0 | 13.0 | 14.0 | 14.0 |
|            |                      | cc-pVDZ          | 0.1 | 1.0 | 2.2 | 3.1 |     | 5.2 | 6.3 | 7.1 |     | 9.2 | 10.2 | 12.0 | 13.0 | 14.0 | 14.0 |
|            |                      | 6-311++G**       | 0.1 | 1.0 | 2.2 |     |     | 5.2 | 6.3 | 7.1 | 8.2 | 9.2 | 10.2 | 12.0 | 13.0 | 14.0 | 14.0 |
|            |                      | cc-pVTZ          | 0.1 | 1.1 | 2.2 | 3.1 |     | 5.2 | 6.3 | 7.1 |     | 9.2 |      |      | 13.0 | 14.0 | 14.0 |
|            |                      | cc-pVQZ          | 0.1 | 1.0 | 2.2 | 3.1 |     | 5.2 | 6.3 | 7.1 | 8.2 |     | 10.2 | 12.0 | 13.0 | 14.0 | 14.0 |
| M11        | ad                   | 6-31G*           | 0.1 | 0.7 | 2.1 | 3.1 |     | 5.1 |     | 7.1 | 8.1 |     | 10.1 |      | 13.0 | 14.0 | 14.0 |
|            |                      | cc-pVDZ          | 0.1 | 0.8 | 2.1 |     |     | 5.1 |     | 7.1 | 8.1 |     | 10.1 |      | 13.0 | 14.0 | 14.0 |
|            |                      | 6-311++G**       | 0.1 | 0.7 | 2.1 | 3.1 |     | 5.2 |     | 7.1 | 8.1 | 9.0 | 10.1 |      |      | 14.0 | 14.0 |
|            |                      | cc-pVTZ          | 0.1 | 0.7 | 2.1 | 3.1 |     | 5.2 |     | 7.1 | 8.1 | 9.1 | 10.1 |      | 13.0 | 14.0 | 14.0 |
|            |                      | cc-pVQZ          | 0.1 | 0.7 |     | 3.1 |     |     |     | 7.1 | 8.1 |     | 10.1 |      | 13.0 | 14.0 | 14.0 |
|            | nd                   | 6-31G*           | 0.1 | 0.7 | 2.1 | 3.1 |     | 5.2 |     | 7.1 |     | 9.1 |      |      | 13.0 | 14.0 | 14.0 |
|            |                      | cc-pVDZ          | 0.1 | 0.7 | 2.1 | 3.1 |     | 5.1 |     | 7.1 | 8.1 | 9.1 |      |      | 13.0 | 14.0 | 14.0 |
|            |                      | 6-311++G**       | 0.1 | 0.7 | 2.1 | 3.1 |     | 5.1 |     | 7.1 | 8.1 | 9.1 |      |      | 13.0 | 14.0 | 14.0 |
|            |                      | cc-pVTZ          | 0.1 |     | 2.1 | 3.1 |     | 5.1 |     | 7.1 | 8.1 | 9.1 | 10.1 |      | 13.0 | 14.0 | 14.0 |
|            |                      | cc-pVQZ          | 0.1 | 0.7 | 2.1 | 3.1 |     |     |     | 7.1 | 8.1 |     | 10.1 |      | 13.0 | 14.0 | 14.0 |

Table S.6: An-O1 distance (in Å) in for  $[An(NO_3)]_6^{2+}$  [with An = Ac to Lr] calculated with LDA, the TPSS, B3LYP, and PBE0 functionals, the 6-31G\*, cc-pVDZ, 6-311++G\*\*, cc-pVTZ, and cc-pVQZ basis set for non-An atoms, and the Stuttgart RSC 1997/ECP for the actinide atoms (including and excluding the most diffuse basis functions in the basis set).

| Functional | An basis set (ad/nd) | Non-An basis set | Ac      | Th   | Pa   | U    | Np   | Pu   | Am   | Cm   | Bk   | Cf   | Es   | Fm   | Md   | No   | Lr   |      |
|------------|----------------------|------------------|---------|------|------|------|------|------|------|------|------|------|------|------|------|------|------|------|
| LDA        | ad                   | 6-31G*           | 2.30    | -    | 2.24 | 2.17 | 2.16 | 2.16 | 2.19 | 2.15 | 2.15 | 2.13 | 2.14 | 2.15 | 2.23 | 2.32 | 2.07 |      |
|            |                      | cc-pVDZ          | 2.31    | -    | 2.25 | -    | 2.17 | 2.18 | -    | 2.15 | 2.15 | 2.13 | -    | 2.15 | 2.26 | 2.33 | 2.08 |      |
|            |                      | 6-311++G**       | 2.31    | -    | 2.25 | 2.18 | 2.15 | 2.19 | -    | 2.16 | 2.16 | 2.16 | 2.16 | 2.16 | 2.25 | 2.34 | 2.08 |      |
|            |                      | cc-pVTZ          | 2.30    | -    | 2.24 | 2.17 | 2.14 | 2.16 | 2.19 | 2.15 | 2.14 | 2.13 | 2.13 | 2.14 | 2.23 | 2.32 | 2.07 |      |
|            |                      | cc-pVQZ          | 2.29    | -    | 2.22 | 2.17 | 2.14 | 2.16 | 2.18 | 2.15 | 2.14 | 2.12 | 2.13 | 2.14 | -    | 2.32 | 2.07 |      |
|            | nd                   | 6-31G*           | 2.30    | -    | 2.24 | 2.18 | -    | 2.17 | 2.19 | 2.15 | 2.15 | 2.13 | 2.14 | 2.18 | 2.25 | 2.32 | 2.07 |      |
|            |                      | cc-pVDZ          | 2.30    | -    | 2.25 | -    | 2.17 | 2.18 | 2.20 | 2.15 | 2.15 | 2.13 | -    | 2.19 | 2.24 | -    | 2.07 |      |
|            |                      | 6-311++G**       | 2.31    | -    | 2.28 | 2.18 | 2.18 | 2.18 | 2.21 | 2.16 | 2.16 | 2.16 | 2.16 | 2.16 | 2.27 | -    | 2.08 |      |
|            |                      | cc-pVTZ          | 2.30    | -    | 2.23 | 2.17 | 2.14 | 2.16 | 2.19 | 2.15 | 2.14 | 2.13 | 2.14 | 2.18 | -    | -    | 2.07 |      |
|            |                      | cc-pVQZ          | 2.29    | -    | 2.22 | 2.18 | 2.16 | 2.16 | 2.18 | 2.15 | 2.14 | 2.12 | 2.14 | 2.14 | 2.24 | 2.32 | 2.07 |      |
|            | TPSS                 | ad               | 6-31G*  | 2.33 | 2.27 | 2.29 | 2.21 | 2.21 | 2.19 | -    | 2.18 | 2.18 | 2.17 | 2.15 | -    | 2.42 | 2.53 | 2.11 |
|            |                      |                  | cc-pVDZ | 2.33 | 2.27 | 2.29 | 2.22 | 2.19 | 2.19 | -    | 2.18 | 2.18 | -    | 2.21 | -    | -    | 2.53 | 2.11 |
| 6-311++G** |                      |                  | -       | -    | -    | -    | -    | -    | -    | -    | -    | -    | -    | -    | -    | -    | -    |      |
| cc-pVTZ    |                      |                  | 2.32    | 2.26 | -    | -    | -    | 2.18 | -    | 2.18 | 2.17 | 2.17 | 2.13 | 2.16 | -    | 2.53 | 2.10 |      |
| cc-pVQZ    |                      |                  | 2.32    | 2.26 | -    | 2.20 | 2.20 | -    | -    | 2.17 | 2.17 | 2.16 | 2.14 | 2.14 | -    | -    | 2.10 |      |
| nd         |                      | 6-31G*           | 2.33    | 2.27 | -    | -    | -    | 2.19 | 2.21 | 2.18 | 2.17 | 2.17 | 2.16 | 2.16 | 2.29 | -    | 2.10 |      |
|            |                      | cc-pVDZ          | 2.33    | 2.27 | -    | -    | -    | 2.19 | 2.22 | 2.18 | 2.18 | 2.18 | -    | -    | 2.32 | -    | 2.11 |      |
|            |                      | 6-311++G**       | 2.34    | -    | 2.29 | 2.22 | 2.21 | 2.20 | -    | 2.19 | 2.18 | 2.18 | 2.16 | -    | -    | 2.56 | 2.11 |      |
|            |                      | cc-pVTZ          | 2.32    | 2.26 | -    | 2.20 | 2.20 | 2.18 | 2.21 | 2.18 | 2.17 | 2.16 | -    | 2.21 | 2.28 | -    | -    |      |
|            |                      | cc-pVQZ          | 2.32    | 2.26 | 2.26 | 2.20 | 2.19 | 2.18 | 2.20 | 2.17 | 2.16 | 2.16 | 2.13 | 2.14 | -    | 2.52 | 2.10 |      |
| B3LYP      |                      | ad               | 6-31G*  | 2.34 | 2.27 | 2.29 | 2.22 | 2.22 | 2.20 | 2.21 | 2.19 | 2.18 | 2.17 | 2.15 | -    | 2.58 | 2.57 | 2.12 |
|            |                      |                  | cc-pVDZ | 2.34 | 2.28 | 2.29 | 2.23 | 2.23 | 2.20 | 2.22 | 2.19 | 2.18 | 2.17 | 2.15 | -    | -    | 2.58 | 2.12 |
|            | 6-311++G**           |                  | 2.35    | 2.28 | 2.29 | 2.24 | 2.22 | 2.22 | 2.23 | 2.20 | 2.18 | 2.18 | 2.15 | -    | 2.64 | 2.61 | 2.12 |      |
|            | cc-pVTZ              |                  | 2.34    | 2.26 | 2.29 | 2.22 | 2.21 | 2.20 | 2.21 | 2.19 | 2.18 | 2.16 | 2.15 | -    | 2.60 | 2.58 | 2.11 |      |
|            | cc-pVQZ              |                  | 2.33    | 2.27 | 2.28 | 2.23 | 2.21 | 2.21 | 2.20 | 2.19 | 2.17 | 2.16 | 2.14 | -    | 2.59 | 2.58 | 2.11 |      |
|            | nd                   | 6-31G*           | 2.34    | 2.27 | 2.28 | 2.23 | 2.21 | 2.20 | 2.21 | 2.19 | 2.18 | 2.15 | 2.15 | -    | 2.53 | 2.57 | 2.11 |      |
|            |                      | cc-pVDZ          | 2.34    | 2.28 | 2.31 | 2.23 | 2.22 | 2.20 | 2.22 | 2.19 | 2.18 | 2.17 | 2.15 | -    | 2.65 | 2.57 | 2.11 |      |
|            |                      | 6-311++G**       | 2.35    | 2.29 | 2.30 | 2.25 | 2.23 | 2.21 | 2.23 | 2.20 | 2.19 | 2.17 | 2.16 | -    | 2.63 | 2.61 | 2.12 |      |
|            |                      | cc-pVTZ          | 2.34    | 2.27 | 2.28 | 2.23 | 2.20 | 2.20 | 2.21 | 2.19 | 2.18 | 2.16 | 2.15 | -    | 2.55 | 2.58 | 2.11 |      |
|            |                      | cc-pVQZ          | 2.33    | 2.26 | 2.27 | 2.22 | 2.21 | 2.24 | 2.20 | 2.19 | 2.17 | 2.16 | 2.15 | -    | 2.58 | 2.58 | 2.11 |      |
|            | PBE0                 | ad               | 6-31G*  | 2.33 | 2.26 | 2.27 | 2.21 | 2.20 | 2.19 | 2.19 | 2.17 | 2.16 | 2.15 | 2.14 | 2.56 | 2.59 | 2.56 | 2.10 |
|            |                      |                  | cc-pVDZ | 2.33 | 2.26 | 2.28 | 2.21 | 2.20 | 2.18 | 2.20 | 2.18 | 2.17 | 2.15 | 2.13 | 2.57 | 2.56 | 2.56 | 2.10 |
| 6-311++G** |                      |                  | 2.33    | 2.27 | 2.28 | 2.23 | 2.21 | 2.19 | 2.20 | 2.18 | 2.17 | 2.13 | 2.14 | 2.60 | 2.62 | 2.59 | 2.10 |      |
| cc-pVTZ    |                      |                  | 2.32    | 2.25 | 2.26 | 2.21 | 2.19 | 2.17 | 2.18 | 2.17 | 2.15 | 2.13 | 2.12 | 2.58 | 2.59 | 2.56 | 2.09 |      |
| cc-pVQZ    |                      |                  | 2.31    | 2.24 | 2.25 | 2.20 | 2.19 | 2.17 | 2.18 | 2.17 | 2.15 | 2.14 | 2.13 | 2.57 | 2.58 | 2.56 | 2.09 |      |
| nd         |                      | 6-31G*           | 2.32    | 2.26 | 2.27 | 2.22 | 2.19 | 2.17 | 2.19 | 2.17 | 2.16 | 2.14 | 2.13 | 2.57 | 2.60 | 2.56 | 2.10 |      |
|            |                      | cc-pVDZ          | 2.33    | -    | 2.28 | 2.22 | 2.20 | 2.18 | 2.19 | 2.18 | 2.17 | 2.15 | 2.13 | 2.59 | 2.62 | 2.56 | 2.10 |      |
|            |                      | 6-311++G**       | 2.33    | 2.27 | 2.27 | 2.23 | 2.21 | 2.17 | 2.20 | 2.18 | 2.17 | 2.13 | 2.14 | 2.60 | 2.57 | 2.59 | 2.10 |      |
|            |                      | cc-pVTZ          | 2.32    | 2.25 | 2.27 | 2.21 | 2.19 | 2.17 | 2.18 | 2.17 | 2.15 | 2.13 | 2.12 | 2.58 | 2.56 | 2.56 | 2.09 |      |
|            |                      | cc-pVQZ          | 2.31    | 2.24 | 2.25 | 2.21 | 2.21 | 2.15 | 2.18 | 2.17 | 2.15 | 2.14 | 2.12 | 2.57 | 2.54 | 2.56 | 2.09 |      |



Table S.7: An-O1 distance (in Å) in for  $[An(NO_3)]^{2+}_{(g)}$  [with An = Ac to Lr] calculated with the B972, M06, and M11 functionals, the 6-31G\*, cc-pVDZ, 6-311++G\*\*, cc-pVTZ, and cc-pVQZ basis set for non-An atoms, and the Stuttgart RSC 1997/ECP for the actinide atoms (including and excluding the most diffuse basis functions in the basis set).

| Functional | An basis set (ad/nd) | Non-An basis set | Ac   | Th   | Pa   | U    | Np   | Pu   | Am   | Cm   | Bk   | Cf   | Es   | Fm   | Md   | No   | Lr   |
|------------|----------------------|------------------|------|------|------|------|------|------|------|------|------|------|------|------|------|------|------|
| B972       | ad                   | 6-31G*           | 2.33 | 2.27 | 2.29 | 2.22 | 2.20 | 2.19 | 2.22 | 2.18 | 2.17 | 2.14 | 2.14 | -    | 2.58 | 2.59 | 2.11 |
|            |                      | cc-pVDZ          | 2.33 | 2.27 | 2.30 | 2.22 | 2.21 | 2.19 | 2.23 | 2.18 | 2.17 | 2.16 | 2.15 | 2.60 | 2.60 | 2.59 | 2.11 |
|            |                      | 6-311++G**       | 2.33 | 2.28 | 2.29 | 2.23 | 2.21 | 2.21 | 2.23 | 2.18 | 2.18 | 2.16 | 2.15 | 2.59 | 2.63 | 2.62 | 2.11 |
|            |                      | cc-pVTZ          | 2.32 | 2.26 | 2.27 | 2.21 | 2.18 | 2.19 | 2.21 | 2.17 | 2.17 | 2.15 | 2.14 | 2.67 | 2.64 | 2.59 | 2.10 |
|            |                      | cc-pVQZ          | 2.31 | 2.26 | 2.26 | 2.21 | 2.18 | 2.17 | 2.20 | 2.17 | 2.15 | 2.15 | 2.13 | 2.57 | 2.61 | 2.59 | 2.10 |
|            | nd                   | 6-31G*           | 2.33 | 2.27 | 2.30 | 2.22 | 2.20 | 2.19 | 2.22 | 2.18 | 2.17 | 2.16 | 2.15 | -    | 2.59 | 2.59 | 2.10 |
|            |                      | cc-pVDZ          | 2.33 | 2.27 | 2.30 | 2.22 | 2.21 | 2.19 | 2.23 | 2.18 | 2.17 | 2.16 | 2.15 | -    | 2.60 | 2.59 | 2.11 |
|            |                      | 6-311++G**       | 2.33 | 2.28 | 2.29 | 2.22 | 2.20 | 2.20 | 2.23 | 2.19 | 2.18 | 2.15 | 2.16 | 2.60 | -    | 2.62 | 2.11 |
|            |                      | cc-pVTZ          | 2.32 | 2.26 | 2.26 | 2.21 | 2.18 | 2.18 | 2.21 | 2.17 | 2.16 | 2.15 | 2.14 | 2.59 | 2.57 | 2.59 | 2.10 |
|            |                      | cc-pVQZ          | 2.31 | 2.26 | 2.26 | 2.20 | 2.19 | 2.17 | 2.20 | 2.17 | 2.15 | 2.15 | 2.13 | 2.59 | 2.59 | 2.59 | 2.09 |
| M06        | ad                   | 6-31G*           | 2.34 | 2.28 | 2.31 | 2.24 | -    | 2.21 | 2.21 | 2.19 | 2.16 | 2.17 | 2.15 | 2.60 | 2.60 | 2.58 | 2.12 |
|            |                      | cc-pVDZ          | 2.34 | 2.29 | 2.28 | 2.26 | -    | 2.19 | 2.22 | 2.19 | 2.17 | 2.18 | 2.15 | 2.63 | 2.60 | 2.59 | 2.12 |
|            |                      | 6-311++G**       | 2.34 | 2.29 | 2.32 | 2.29 | -    | 2.25 | 2.22 | 2.20 | 2.18 | 2.18 | 2.12 | 2.66 | 2.63 | 2.61 | 2.12 |
|            |                      | cc-pVTZ          | 2.32 | 2.27 | 2.28 | 2.25 | -    | 2.18 | 2.20 | 2.18 | 2.17 | 2.16 | 2.15 | 2.63 | 2.61 | 2.58 | 2.11 |
|            |                      | cc-pVQZ          | 2.31 | 2.27 | 2.23 | -    | -    | 2.19 | 2.19 | 2.18 | 2.15 | -    | -    | 2.59 | 2.59 | 2.57 | 2.10 |
|            | nd                   | 6-31G*           | 2.33 | 2.28 | 2.32 | 2.23 | -    | 2.21 | 2.21 | 2.19 | 2.18 | 2.14 | 2.15 | 2.59 | 2.59 | 2.58 | 2.12 |
|            |                      | cc-pVDZ          | 2.34 | 2.28 | 2.28 | 2.24 | -    | 2.20 | 2.22 | 2.19 | -    | 2.14 | 2.15 | 2.55 | 2.60 | 2.59 | 2.12 |
|            |                      | 6-311++G**       | 2.34 | 2.29 | 2.32 | -    | -    | 2.22 | 2.23 | 2.20 | 2.18 | 2.21 | 2.14 | 2.62 | 2.62 | 2.61 | 2.12 |
|            |                      | cc-pVTZ          | 2.32 | 2.27 | 2.30 | 2.22 | -    | 2.20 | 2.20 | 2.18 | -    | 2.13 | -    | -    | 2.56 | 2.58 | 2.11 |
|            |                      | cc-pVQZ          | 2.31 | 2.27 | 2.25 | 2.19 | -    | 2.19 | 2.19 | 2.18 | 2.16 | -    | 2.19 | 2.59 | 2.53 | 2.57 | 2.10 |
| M11        | ad                   | 6-31G*           | 2.35 | 2.28 | 2.29 | 2.27 | -    | 2.17 | -    | 2.20 | 2.19 | -    | 2.14 | -    | 2.55 | 2.57 | 2.12 |
|            |                      | cc-pVDZ          | 2.35 | 2.29 | 2.30 | -    | -    | 2.17 | -    | 2.20 | 2.18 | -    | 2.16 | -    | 2.70 | 2.57 | 2.12 |
|            |                      | 6-311++G**       | 2.36 | 2.30 | 2.34 | 2.23 | -    | 2.24 | -    | 2.21 | 2.19 | 2.19 | 2.10 | -    | -    | 2.61 | 2.13 |
|            |                      | cc-pVTZ          | 2.35 | 2.28 | 2.27 | 2.26 | -    | 2.21 | -    | 2.19 | 2.17 | 2.15 | 2.11 | -    | 2.55 | 2.58 | 2.12 |
|            |                      | cc-pVQZ          | 2.34 | 2.28 | -    | 2.26 | -    | -    | -    | 2.19 | 2.17 | -    | 2.11 | -    | 2.58 | 2.58 | 2.11 |
|            | nd                   | 6-31G*           | 2.34 | 2.28 | 2.31 | 2.25 | -    | 2.21 | -    | 2.19 | -    | 2.12 | -    | -    | 2.55 | 2.57 | 2.12 |
|            |                      | cc-pVDZ          | 2.35 | 2.28 | 2.31 | 2.25 | -    | 2.17 | -    | 2.20 | 2.18 | 2.14 | -    | -    | 2.55 | 2.57 | 2.12 |
|            |                      | 6-311++G**       | 2.36 | 2.30 | 2.26 | 2.26 | -    | 2.20 | -    | 2.21 | 2.18 | 2.14 | -    | -    | 2.56 | 2.61 | 2.12 |
|            |                      | cc-pVTZ          | 2.34 | -    | 2.28 | 2.23 | -    | 2.22 | -    | 2.19 | 2.17 | 2.15 | 2.10 | -    | 2.55 | 2.58 | 2.12 |
|            |                      | cc-pVQZ          | 2.34 | 2.28 | 2.31 | 2.24 | -    | -    | -    | 2.19 | 2.17 | -    | 2.14 | -    | 2.56 | 2.58 | 2.11 |

Table S.8: An-O1 distance (in Å), O1-An-O2 angle (in °), and O1-N-O2 (in °) calculated with the B3LYP functionals, the 6-311++G\*\* basis set for non-An atoms, and the Stuttgart RSC 1997/ECP for the actinide atoms (including all basis functions in the basis set), for  $[\text{An}(\text{NO}_3)]^{2+}$  and  $[\text{An}(\text{NO}_3)]^+$  [with An = Fm, Md, and No].

| An | An-O1 distance (Å) |      | O1-An-O2 angle (°) |       | O1-N-O2 angle (°) |        |
|----|--------------------|------|--------------------|-------|-------------------|--------|
|    | III                | IV   | III                | IV    | III               | IV     |
| Fm | 2.28               | 2.60 | 57.00              | 48.93 | 112.93            | 122.85 |
| Md | 2.31               | 2.64 | 56.99              | 48.95 | 112.93            | 122.62 |
| No | 2.28               | 2.61 | 57.33              | 49.06 | 113.12            | 122.91 |

Table S.9: An-O1 distance (in Å) calculated with the B3LYP and PBE0 functionals, the 6-31G\* and 6-311++G\*\* basis set for non-An atoms, and the Stuttgart RSC 1997/ECP for the actinide atoms (including all basis functions in the basis set).

| An | B3LYP  |      |            |      | PBE0   |      |            |      |
|----|--------|------|------------|------|--------|------|------------|------|
|    | 6-31G* |      | 6-311++G** |      | 6-31G* |      | 6-311++G** |      |
|    | (g)    | (aq) | (g)        | (aq) | (g)    | (aq) | (g)        | (aq) |
| Ac | 2.34   | 2.48 | 2.35       | 2.51 | 2.33   | 2.47 | 2.33       | 2.49 |
| Pa | 2.29   | 2.41 | 2.29       | 2.44 | 2.27   | 2.40 | 2.28       | 2.42 |
| U  | 2.22   | 2.35 | 2.24       | 2.38 | 2.21   | 2.34 | 2.23       | 2.36 |
| Np | 2.22   | 2.33 | 2.22       | 2.36 | 2.20   | 2.32 | 2.21       | 2.34 |
| Pu | 2.20   | 2.31 | 2.22       | 2.33 | 2.19   | 2.30 | 2.19       | 2.31 |
| Am | 2.21   | 2.30 | 2.23       | 2.33 | 2.19   | 2.29 | 2.20       | 2.31 |
| Cm | 2.19   | 2.30 | 2.20       | 2.32 | 2.17   | 2.29 | 2.18       | 2.31 |
| Bk | 2.18   | 2.28 | 2.18       | -    | 2.16   | 2.27 | 2.17       | 2.29 |
| Cf | 2.17   | 2.26 | 2.18       | 2.29 | 2.15   | 2.25 | 2.13       | 2.27 |
| Es | 2.15   | 2.25 | -          | 2.28 | 2.14   | 2.24 | -          | 2.26 |
| Fm | -      | -    | 2.60       | 2.26 | 2.56   | 2.23 | 2.60       | 2.24 |
| Md | 2.58   | -    | 2.64       | 2.31 | 2.59   | -    | 2.62       | 2.26 |
| Lr | 2.12   | 2.34 | 2.12       | 2.37 | 2.10   | 2.33 | 2.10       | 2.36 |

Table S.10: O1-An-O2 angle (in °) calculated with the B3LYP and PBE0 functionals, the 6-31G\* and 6-311++G\*\* basis set for non-An atoms, and the Stuttgart RSC 1997/ECP for the actinide atoms (including all basis functions in the basis set).

| An | B3LYP  |       |            |       | PBE0   |       |            |       |
|----|--------|-------|------------|-------|--------|-------|------------|-------|
|    | 6-31G* |       | 6-311++G** |       | 6-31G* |       | 6-311++G** |       |
|    | (g)    | (aq)  | (g)        | (aq)  | (g)    | (aq)  | (g)        | (aq)  |
| Ac | 55.66  | 51.35 | 55.30      | 50.37 | 55.41  | 51.21 | 55.13      | 50.42 |
| Th | 57.19  | 81.47 | 56.84      | 81.91 | 56.90  | 63.64 | 56.51      | -     |
| Pa | 56.89  | 53.21 | 56.56      | 52.22 | 56.41  | 53.02 | 56.08      | 52.19 |
| U  | 58.36  | 54.75 | 57.81      | 53.72 | 58.09  | 54.63 | 57.60      | 53.81 |
| Np | 58.75  | 55.47 | 58.27      | 54.42 | 58.45  | 55.32 | 57.99      | 54.44 |
| Pu | 58.90  | 56.16 | 58.31      | 55.31 | 58.72  | 56.01 | 58.48      | 55.31 |
| Am | 58.21  | 56.25 | 57.63      | 55.42 | 58.21  | 56.13 | 57.73      | 55.44 |
| Cm | 59.76  | 56.47 | 59.29      | 55.59 | 59.51  | 56.23 | 59.12      | 55.51 |
| Bk | 59.65  | 57.07 | 59.61      | -     | 59.91  | 56.84 | 59.14      | 56.15 |
| Cf | 59.86  | 57.65 | 59.31      | 56.59 | 59.86  | 57.43 | 60.17      | 56.71 |
| Es | 60.54  | 57.88 | -          | 57.10 | 60.28  | 57.61 | -          | 56.98 |
| Fm | -      | -     | 48.93      | 57.29 | 50.16  | 57.92 | 49.01      | 57.35 |
| Md | 50.00  | -     | 48.95      | 55.71 | 49.73  | -     | 48.90      | 56.55 |
| No | 50.04  | 53.19 | 49.06      | 52.26 | 49.93  | 52.78 | 49.15      | 51.86 |
| Lr | 62.58  | 55.20 | 62.25      | 54.34 | 62.19  | 54.89 | 61.91      | 54.15 |

Table S.11: Predicted Gibbs free energy of reaction for the  $[\text{An}(\text{NO}_3)]^{2+}$  compounds (from Ac to Lr) with CCSD(T), the cc-pVQZ-DK, and the cc-pVTZ-DK basis set for N and O atoms, and the cc-pVTZ-X2C basis set for the actinides.

|    | <b>CBS</b> | <b>cc-pVQZ-DK</b> | <b>cc-pVTZ-DK</b> |
|----|------------|-------------------|-------------------|
| Ac | -448.34    | -450.57           | -456.16           |
| Th | -475.73    | -478.04           | -483.55           |
| Pa | -494.73    | -496.62           | -501.52           |
| U  | -511.24    | -512.84           | -517.27           |
| Np | -520.96    | -522.59           | -527.09           |
| Pu | -521.40    | -522.95           | -527.39           |
| Am | -496.93    | -498.60           | -503.15           |
| Cm | -499.42    | -501.00           | -505.33           |
| Bk | -509.96    | -511.56           | -516.02           |
| Cf | -515.31    | -516.88           | -521.33           |
| Es | -557.51    | -558.59           | -562.58           |
| Fm | -568.52    | -568.62           | -571.23           |
| Md | -562.86    | -563.40           | -566.43           |
| No | -600.32    | -600.90           | -604.07           |
| Lr | -520.91    | -522.16           | -525.88           |

Table S.12:  $\Delta(\Delta G)_{rxn}$  for  $[An(NO_3)]^{2+}$  including and excluding the most diffuse functions in the An basis set with LDA, TPSS, B3LYP, PBE0, B972, M06, and M11 with the Stuttgart RSC 1997 ECP and associated basis set, and the 6-31G\*, cc-pVDZ, 6-311++G\*\*, cc-pVTZ, and cc-pVQZ for N and O. Values reported in kcal mol<sup>-1</sup>. [ $\Delta(\Delta G)_{rxn} = \Delta G_{rxn,ad} - \Delta G_{rxn,nd}$ , as indicated in Eq. 6; with An = Th - Lr].

| Functional | Non-An basis set | Ac    | Th    | Pa    | U      | Np     | Pu     | Am    | Cm    | Bk    | Cf    | Es     | Fm    | Md     | No     | Lr    |
|------------|------------------|-------|-------|-------|--------|--------|--------|-------|-------|-------|-------|--------|-------|--------|--------|-------|
| LDA        | 6-31G*           | -1.15 | -     | -0.93 | -0.01  | -      | -0.52  | -1.06 | -0.67 | -0.49 | -0.09 | 0.54   | -2.99 | -0.99  | -4.76  | -2.72 |
|            | cc-pVDZ          | -1.49 | -     | -1.42 | -      | -0.27  | -0.73  | -     | -0.85 | -0.37 | -0.06 | -      | -3.57 | 0.93   | -      | -3.59 |
|            | 6-311++G**       | -1.37 | -     | -1.54 | 0.09   | -0.27  | -0.23  | -     | -0.33 | -0.30 | -0.23 | 0.47   | -1.85 | -1.07  | -      | -0.84 |
|            | cc-pVTZ          | -0.45 | -     | -0.17 | 0.40   | -0.24  | -0.14  | -0.26 | -0.19 | -0.05 | -0.02 | 0.23   | -1.73 | -      | -      | -0.93 |
|            | cc-pVQZ          | -0.34 | -     | -0.08 | -0.50  | -0.12  | -0.03  | -0.09 | -0.08 | -0.02 | -0.03 | 0.18   | -1.49 | -      | -4.66  | -0.33 |
| TPSS       | 6-31G*           | -1.01 | -0.46 | -     | -      | -      | -2.63  | -     | -0.59 | -0.08 | -0.55 | -1.69  | -     | 0.52   | -      | -2.37 |
|            | cc-pVDZ          | -1.30 | -1.09 | -     | -      | -      | -2.77  | -     | -0.75 | 2.06  | -     | -      | -     | -      | -      | -3.08 |
|            | 6-311++G**       | -     | -     | -     | -      | -      | -      | -     | -     | -     | -     | -      | -     | -      | -      | -     |
|            | cc-pVTZ          | -0.41 | 0.84  | -     | -      | -      | -2.25  | -     | -0.16 | 0.78  | -1.19 | -      | -9.98 | -      | -      | -     |
|            | cc-pVQZ          | -0.30 | 1.25  | -     | -13.20 | 0.05   | -      | -     | -0.07 | -0.02 | -0.47 | 0.20   | -0.09 | -      | -      | -0.29 |
| B3LYP      | 6-31G*           | -1.22 | -0.07 | -1.74 | -1.37  | -10.49 | -6.73  | -1.13 | -0.72 | -0.12 | 0.75  | -11.24 | -     | -4.66  | -0.11  | -2.76 |
|            | cc-pVDZ          | -1.57 | -3.35 | -4.58 | -1.29  | -13.52 | -10.59 | -1.45 | -0.91 | -0.16 | 2.30  | -9.46  | -     | -      | -0.17  | -3.63 |
|            | 6-311++G**       | -1.14 | -0.38 | -2.34 | -1.19  | -10.70 | -8.20  | -0.34 | -0.29 | -1.90 | 3.07  | -5.77  | -0.54 | 0.03   | 0.04   | -0.82 |
|            | cc-pVTZ          | -0.47 | -0.48 | -1.60 | -1.29  | -13.64 | -9.10  | -0.25 | -0.17 | -0.01 | 2.48  | -9.25  | -0.48 | -0.12  | -0.04  | -0.93 |
|            | cc-pVQZ          | -0.31 | -0.95 | -1.48 | -1.14  | -13.35 | -20.31 | -0.10 | -0.07 | -0.02 | 3.08  | -2.94  | -0.13 | 0.11   | -0.01  | -0.33 |
| PBE0       | 6-31G*           | -1.01 | -2.18 | -1.96 | -2.29  | -2.80  | 0.80   | 2.55  | -0.59 | -0.09 | 0.36  | 23.40  | 1.11  | 0.79   | -0.06  | -2.36 |
|            | cc-pVDZ          | -1.33 | -     | -2.11 | -0.34  | 1.11   | -1.65  | 2.25  | -0.76 | -0.15 | -0.14 | 21.65  | 0.74  | 0.89   | -0.15  | -3.16 |
|            | 6-311++G**       | -1.24 | -1.03 | -1.23 | -0.18  | -0.69  | -12.90 | 3.13  | -0.34 | -0.04 | -0.06 | 22.90  | -0.54 | 1.00   | -0.03  | -0.87 |
|            | cc-pVTZ          | -0.41 | -0.92 | -1.95 | -0.22  | -0.80  | -1.80  | 3.28  | -0.15 | -0.04 | -0.59 | 23.50  | -0.54 | 0.94   | -0.04  | -0.82 |
|            | cc-pVQZ          | -0.28 | -0.50 | -1.18 | -2.18  | -6.39  | -10.57 | 3.44  | -0.06 | -0.01 | -0.02 | 20.30  | -0.21 | 0.85   | -0.01  | -0.29 |
| B972       | 6-31G*           | -0.98 | -2.14 | -2.37 | -0.11  | -0.08  | -0.40  | -0.95 | -0.57 | -0.10 | -3.91 | -0.29  | -     | 16.77  | -0.07  | -2.26 |
|            | cc-pVDZ          | -1.29 | -2.82 | -2.51 | -0.15  | -1.18  | -1.32  | -1.22 | -0.74 | -0.13 | -5.42 | -0.43  | -     | -3.54  | -0.11  | -3.03 |
|            | 6-311++G**       | -1.28 | -0.97 | -2.11 | -0.05  | -1.18  | 10.13  | -0.38 | -0.33 | -0.04 | -7.78 | -6.28  | -0.51 | -      | -0.05  | -0.85 |
|            | cc-pVTZ          | -0.41 | -0.86 | -1.52 | -0.04  | -0.14  | 0.89   | -0.24 | -0.15 | 2.08  | -5.33 | -0.04  | -0.88 | 0.07   | -0.05  | -0.79 |
|            | cc-pVQZ          | -0.30 | -0.45 | -1.97 | 0.01   | 0.95   | -0.36  | -0.09 | -0.06 | -0.02 | -5.30 | -0.03  | -0.21 | 0.44   | -0.01  | -0.27 |
| M06        | 6-31G*           | -1.02 | -4.92 | -0.35 | -0.19  | -      | 2.65   | 3.80  | -0.59 | 0.35  | 4.23  | -1.74  | -1.14 | -0.52  | -0.01  | -2.33 |
|            | cc-pVDZ          | -1.28 | -5.42 | -3.06 | 0.72   | -      | 2.60   | 3.54  | -0.74 | -     | 4.20  | 1.85   | -3.32 | -0.18  | -0.06  | -3.03 |
|            | 6-311++G**       | -1.10 | -3.58 | -2.66 | -      | -      | 12.50  | 4.36  | -0.33 | -0.82 | 1.52  | -0.35  | -1.55 | -4.39  | -0.01  | -0.82 |
|            | cc-pVTZ          | -0.36 | -5.85 | 0.11  | 5.69   | -      | 2.56   | 4.55  | -0.15 | -     | 4.29  | -      | -     | -17.27 | 0.02   | -0.71 |
|            | cc-pVQZ          | -0.29 | -2.80 | -1.45 | -      | -      | 1.85   | 4.64  | -0.08 | 1.66  | -     | -      | -0.20 | -17.54 | 17.12  | -0.26 |
| M11        | 6-31G*           | -1.19 | -2.37 | -0.45 | -1.60  | -      | -1.11  | -     | -0.66 | -     | -     | -      | -     | 0.01   | -12.33 | -2.61 |
|            | cc-pVDZ          | -1.58 | -3.11 | 1.60  | -      | -      | -4.96  | -     | -0.85 | -2.48 | -     | -      | -     | 7.69   | -12.24 | -3.55 |
|            | 6-311++G**       | -1.17 | -1.20 | 5.13  | -2.39  | -      | -10.99 | -     | -0.40 | 3.41  | 12.26 | -      | -     | -      | -0.06  | -0.98 |
|            | cc-pVTZ          | -0.44 | -     | 24.51 | -0.67  | -      | -8.59  | -     | -0.17 | -2.68 | 1.44  | -19.77 | -     | 0.03   | -0.19  | -0.76 |
|            | cc-pVQZ          | -0.30 | -0.55 | -     | -2.20  | -      | -      | -     | -0.08 | -2.66 | -     | -3.85  | -     | -4.84  | -0.06  | -0.25 |

Table S.13:  $\Delta(\Delta G)_{rxn}$  for  $[An(NO_3)]^{2+}$  normalized to Ac calculated with LDA and TPSS with the Stuttgart RSC 1997 ECP and basis set including (ad) and excluding (nd) the most diffuse basis functions for An, and the 6-31G\*, cc-pVDZ, 6-311++G\*\*, cc-pVTZ, and cc-pVQZ for N and O.  $\Delta(\Delta G)_{rxn}$  calculated with CCSD(T)-FC1 includes the cc-pV $\infty$ Z-X2C basis set for An, and the cc-pV $\infty$ Z-DK basis set for N and O is included as reference (indicated as CCSD(T)/CBS). Values reported in kcal mol<sup>-1</sup>. [ $\Delta(\Delta G)_{rxn} = \Delta G_{rxn,An} - \Delta G_{rxn,Ac}$ , as indicated in Eq. 5.a; with An = Th - Lr].

|      |        | 6-31G*  | cc-pVDZ | 6-311++G** | cc-pVTZ | cc-pVQZ | CCSD(T)/CBS |         |
|------|--------|---------|---------|------------|---------|---------|-------------|---------|
| LDA  | ad     | Th      | -       | -          | -       | -       | -27.39      |         |
|      |        | Pa      | -24.19  | -23.58     | -24.30  | -25.06  | -26.41      | -46.38  |
|      |        | U       | -45.70  | -          | -45.08  | -46.05  | -46.41      | -62.90  |
|      |        | Np      | -54.97  | -54.41     | -54.33  | -55.70  | -55.61      | -72.61  |
|      |        | Pu      | -67.80  | -66.88     | -66.08  | -67.75  | -67.29      | -73.06  |
|      |        | Am      | -79.79  | -          | -       | -79.49  | -78.81      | -48.59  |
|      |        | Cm      | -65.04  | -64.84     | -64.08  | -65.10  | -64.65      | -51.08  |
|      |        | Bk      | -76.19  | -75.75     | -75.84  | -77.04  | -76.88      | -61.61  |
|      |        | Cf      | -84.49  | -84.15     | -84.32  | -85.36  | -85.14      | -66.97  |
|      |        | Es      | -93.57  | -          | -93.82  | -94.55  | -94.17      | -109.17 |
|      |        | Fm      | -114.37 | -115.00    | -113.30 | -113.62 | -112.68     | -120.18 |
|      |        | Md      | -122.44 | -121.16    | -123.42 | -123.62 | -           | -114.51 |
|      |        | No      | -146.03 | -146.01    | -147.26 | -147.23 | -146.74     | -151.98 |
|      | Lr     | -84.80  | -84.65  | -83.59     | -85.19  | -84.81  | -72.56      |         |
|      | nd     | Th      | -       | -          | -       | -       | -           | -27.39  |
|      |        | Pa      | -24.40  | -23.64     | -24.13  | -25.34  | -26.66      | -46.38  |
|      |        | U       | -46.84  | -          | -46.54  | -46.89  | -46.25      | -62.90  |
|      |        | Np      | -       | -55.62     | -55.43  | -55.91  | -55.83      | -72.61  |
|      |        | Pu      | -68.42  | -67.64     | -67.21  | -68.06  | -67.59      | -73.06  |
|      |        | Am      | -79.88  | -80.29     | -79.79  | -79.67  | -79.06      | -48.59  |
|      |        | Cm      | -65.52  | -65.48     | -65.11  | -65.36  | -64.90      | -51.08  |
|      |        | Bk      | -76.85  | -76.86     | -76.90  | -77.44  | -77.19      | -61.61  |
| Cf   |        | -85.54  | -85.57  | -85.45     | -85.78  | -85.45  | -66.97      |         |
| Es   |        | -95.26  | -       | -95.66     | -95.23  | -94.69  | -109.17     |         |
| Fm   |        | -112.52 | -112.92 | -112.82    | -112.34 | -111.53 | -120.18     |         |
| Md   |        | -122.60 | -123.58 | -123.72    | -       | -122.97 | -114.51     |         |
| No   |        | -142.42 | -       | -          | -       | -142.42 | -151.98     |         |
| Lr   | -83.23 | -82.55  | -84.11  | -84.70     | -84.81  | -72.56  |             |         |
| TPSS | ad     | Th      | -23.65  | -23.33     | -       | -23.61  | -23.52      | -27.39  |
|      |        | Pa      | -15.24  | -17.40     | -       | -       | -           | -46.38  |
|      |        | U       | -50.83  | -48.29     | -       | -       | -51.74      | -62.90  |
|      |        | Np      | -43.53  | -44.58     | -       | -       | -45.93      | -72.61  |
|      |        | Pu      | -58.60  | -58.35     | -       | -58.91  | -           | -73.06  |
|      |        | Am      | -       | -          | -       | -       | -           | -48.59  |
|      |        | Cm      | -54.47  | -54.24     | -       | -54.90  | -54.48      | -51.08  |
|      |        | Bk      | -66.76  | -65.05     | -       | -68.10  | -67.91      | -61.61  |
|      |        | Cf      | -74.11  | -          | -       | -75.42  | -75.19      | -66.97  |
|      |        | Es      | -92.17  | -82.04     | -       | -93.56  | -92.95      | -109.17 |
|      |        | Fm      | -       | -          | -       | -89.77  | -87.53      | -120.18 |
|      |        | Md      | -102.31 | -          | -       | -       | -           | -114.51 |
|      |        | No      | -132.34 | -132.60    | -       | -133.81 | -           | -151.98 |
|      | Lr     | -76.42  | -76.25  | -          | -77.22  | -76.85  | -72.56      |         |
|      | nd     | Th      | -24.20  | -23.55     | -       | -24.86  | -25.08      | -27.39  |
|      |        | Pa      | -       | -          | -19.13  | -       | -19.84      | -46.38  |
|      |        | U       | -       | -          | -38.49  | -38.96  | -38.84      | -62.90  |
|      |        | Np      | -       | -          | -46.01  | -45.66  | -46.28      | -72.61  |
|      |        | Pu      | -56.99  | -56.88     | -56.59  | -57.06  | -56.63      | -73.06  |
|      |        | Am      | -66.61  | -66.97     | -       | -66.83  | -66.24      | -48.59  |
|      |        | Cm      | -54.90  | -54.80     | -54.85  | -55.15  | -54.72      | -51.08  |
|      |        | Bk      | -67.69  | -68.42     | -68.36  | -69.29  | -68.20      | -61.61  |
| Cf   |        | -74.57  | -74.57  | -75.12     | -74.63  | -75.02  | -66.97      |         |
| Es   |        | -91.49  | -       | -89.16     | -       | -93.45  | -109.17     |         |
| Fm   |        | -88.35  | -       | -          | -80.19  | -87.74  | -120.18     |         |
| Md   |        | -103.84 | -104.36 | -          | -104.64 | -       | -114.51     |         |
| No   |        | -       | -       | -135.42    | -       | -133.28 | -151.98     |         |
| Lr   | -75.07 | -74.47  | -76.08  | -          | -76.87  | -72.56  |             |         |

Table S.14:  $\Delta(\Delta G)_{rxn}$  for  $[An(NO_3)]^{2+}$  normalized to Ac calculated with B3LYP and PBE0 with the Stuttgart RSC 1997 ECP and basis set including (ad) and excluding (nd) the most diffuse basis functions for An, and the 6-31G\*, cc-pVDZ, 6-311++G\*\*, cc-pVTZ, and cc-pVQZ for N and O.  $\Delta(\Delta G)_{rxn}$  calculated with CCSD(T)-FC1 includes the cc-pV $\infty$ Z-X2C basis set for An, and the cc-pV $\infty$ Z-DK basis set for N and O is included as reference (indicated as CCSD(T)/CBS). Values reported in kcal mol<sup>-1</sup>. [ $\Delta(\Delta G)_{rxn} = \Delta G_{rxn,An} - \Delta G_{rxn,Ac}$ , as indicated in Eq. 5.a; with An = Th - Lr].

|       |         |         | 6-31G*  | cc-pVDZ | 6-311++G** | cc-pVTZ | cc-pVQZ | CCSD(T)/CBS |
|-------|---------|---------|---------|---------|------------|---------|---------|-------------|
| B3LYP | ad      | Th      | -21.00  | -23.26  | -21.58     | -22.78  | -23.26  | -27.39      |
|       |         | Pa      | -19.14  | -19.07  | -19.99     | -20.12  | -20.66  | -46.38      |
|       |         | U       | -37.77  | -37.09  | -37.72     | -38.73  | -38.75  | -62.90      |
|       |         | Np      | -53.54  | -54.43  | -53.57     | -56.10  | -56.11  | -72.61      |
|       |         | Pu      | -60.65  | -64.11  | -61.57     | -63.58  | -62.25  | -73.06      |
|       |         | Am      | -63.27  | -63.59  | -62.52     | -63.17  | -62.67  | -48.59      |
|       |         | Cm      | -53.86  | -53.64  | -53.28     | -54.09  | -53.78  | -51.08      |
|       |         | Bk      | -65.18  | -64.71  | -66.88     | -66.40  | -67.53  | -61.61      |
|       |         | Cf      | -67.64  | -67.53  | -67.82     | -68.83  | -68.80  | -66.97      |
|       |         | Es      | -97.33  | -95.79  | -90.00     | -97.24  | -90.70  | -109.17     |
|       |         | Fm      | -       | -       | -79.94     | -79.10  | -77.85  | -120.18     |
|       |         | Md      | -101.82 | -       | -104.14    | -103.52 | -102.71 | -114.51     |
|       | No      | -132.27 | -132.45 | -134.54 | -134.02    | -133.41 | -151.98 |             |
|       | Lr      | -77.62  | -77.48  | -76.62  | -78.04     | -77.72  | -72.56  |             |
|       | nd      | Th      | -22.15  | -21.47  | -22.34     | -22.77  | -22.62  | -27.39      |
|       |         | Pa      | -18.62  | -16.06  | -18.79     | -18.99  | -19.49  | -46.38      |
|       |         | U       | -37.62  | -37.36  | -37.67     | -37.90  | -37.91  | -62.90      |
|       |         | Np      | -44.27  | -42.47  | -44.01     | -42.93  | -43.07  | -72.61      |
|       |         | Pu      | -55.14  | -55.09  | -54.52     | -54.95  | -42.25  | -73.06      |
|       |         | Am      | -63.36  | -63.72  | -63.33     | -63.38  | -62.88  | -48.59      |
|       |         | Cm      | -54.36  | -54.30  | -54.13     | -54.38  | -54.02  | -51.08      |
|       |         | Bk      | -66.28  | -66.11  | -66.12     | -66.86  | -67.82  | -61.61      |
| Cf    |         | -69.60  | -71.40  | -72.03  | -71.78     | -72.18  | -66.97  |             |
| Es    |         | -87.30  | -87.90  | -85.37  | -88.45     | -88.07  | -109.17 |             |
| Fm    |         | -       | -80.09  | -80.54  | -79.09     | -78.03  | -120.18 |             |
| Md    |         | -98.38  | -99.01  | -105.32 | -103.87    | -103.13 | -114.51 |             |
| No    | -133.37 | -133.85 | -135.73 | -134.44 | -133.70    | -151.98 |         |             |
| Lr    | -76.08  | -75.42  | -76.95  | -77.58  | -77.70     | -72.56  |         |             |
| PBE0  | ad      | Th      | -23.54  | -23.19  | -22.24     | -23.57  | -23.50  | -27.39      |
|       |         | Pa      | -17.54  | -16.95  | -17.98     | -18.60  | -19.64  | -46.38      |
|       |         | U       | -36.41  | -35.75  | -36.09     | -37.35  | -37.38  | -62.90      |
|       |         | Np      | -45.70  | -43.10  | -45.25     | -46.69  | -46.58  | -72.61      |
|       |         | Pu      | -51.60  | -54.35  | -54.40     | -55.66  | -55.24  | -73.06      |
|       |         | Am      | -61.45  | -61.72  | -60.75     | -61.60  | -61.02  | -48.59      |
|       |         | Cm      | -51.63  | -51.36  | -51.05     | -52.08  | -51.65  | -51.08      |
|       |         | Bk      | -63.31  | -61.56  | -62.03     | -64.67  | -64.88  | -61.61      |
|       |         | Cf      | -67.04  | -67.00  | -62.94     | -68.91  | -68.31  | -66.97      |
|       |         | Es      | -70.17  | -70.44  | -71.07     | -71.60  | -71.92  | -109.17     |
|       |         | Fm      | -73.86  | -74.84  | -77.23     | -76.55  | -74.79  | -120.18     |
|       |         | Md      | -99.13  | -99.34  | -101.15    | -100.48 | -99.23  | -114.51     |
|       | No      | -130.69 | -131.00 | -132.73 | -132.11    | -131.02 | -151.98 |             |
|       | Lr      | -74.53  | -74.33  | -73.75  | -75.31     | -74.87  | -72.56  |             |
|       | nd      | Th      | -22.36  | -       | -22.45     | -23.07  | -23.29  | -27.39      |
|       |         | Pa      | -16.59  | -16.17  | -18.00     | -17.06  | -18.75  | -46.38      |
|       |         | U       | -35.12  | -36.75  | -37.15     | -37.54  | -35.48  | -62.90      |
|       |         | Np      | -43.90  | -45.54  | -45.80     | -46.30  | -40.48  | -72.61      |
|       |         | Pu      | -53.41  | -54.03  | -42.75     | -54.26  | -44.96  | -73.06      |
|       |         | Am      | -65.01  | -65.31  | -65.12     | -65.29  | -64.74  | -48.59      |
|       |         | Cm      | -52.05  | -51.93  | -51.96     | -52.33  | -51.88  | -51.08      |
|       |         | Bk      | -64.22  | -62.75  | -63.23     | -65.04  | -65.15  | -61.61      |
| Cf    |         | -68.41  | -68.19  | -64.12  | -68.74     | -68.57  | -66.97  |             |
| Es    |         | -94.58  | -93.43  | -95.22  | -95.52     | -92.51  | -109.17 |             |
| Fm    |         | -75.98  | -76.92  | -77.92  | -76.42     | -74.86  | -120.18 |             |
| Md    |         | -100.93 | -101.56 | -103.40 | -101.83    | -100.36 | -114.51 |             |
| No    | -131.64 | -132.19 | -133.94 | -132.48 | -131.30    | -151.98 |         |             |
| Lr    | -73.18  | -72.50  | -74.12  | -74.90  | -74.87     | -72.56  |         |             |



Table S.15:  $\Delta(\Delta G)_{rxn}$  for  $[An(NO_3)]^{2+}$  normalized to Ac calculated with B972 and M06 with the Stuttgart RSC 1997 ECP and basis set including (ad) and excluding (nd) the most diffuse basis functions for An, and the 6-31G\*, cc-pVDZ, 6-311++G\*\*, cc-pVTZ, and cc-pVQZ for N and O.  $\Delta(\Delta G)_{rxn}$  calculated with CCSD(T)-FC1 includes the cc-pV $\infty$ Z-X2C basis set for An, and the cc-pV $\infty$ Z-DK basis set for N and O is included as reference (indicated as CCSD(T)/CBS). Values reported in kcal mol<sup>-1</sup>. [ $\Delta(\Delta G)_{rxn} = \Delta G_{rxn,An} - \Delta G_{rxn,Ac}$ , as indicated in Eq. 5.a; with An = Th - Lr].

|      |         | 6-31G*  | cc-pVDZ | 6-311++G** | cc-pVTZ | cc-pVQZ | CCSD(T)/CBS |         |
|------|---------|---------|---------|------------|---------|---------|-------------|---------|
| B972 | ad      | Th      | -20.93  | -20.65     | -19.74  | -20.84  | -20.64      | -27.39  |
|      |         | Pa      | -17.27  | -16.69     | -18.58  | -19.32  | -20.16      | -46.38  |
|      |         | U       | -36.26  | -35.63     | -35.93  | -37.24  | -37.17      | -62.90  |
|      |         | Np      | -44.90  | -44.26     | -44.57  | -44.85  | -44.84      | -72.61  |
|      |         | Pu      | -54.43  | -54.16     | -43.23  | -53.86  | -53.52      | -73.06  |
|      |         | Am      | -63.75  | -64.11     | -63.23  | -63.84  | -63.16      | -48.59  |
|      |         | Cm      | -51.48  | -51.20     | -50.89  | -51.93  | -51.50      | -51.08  |
|      |         | Bk      | -62.89  | -64.16     | -62.82  | -63.42  | -65.75      | -61.61  |
|      |         | Cf      | -71.93  | -72.95     | -74.49  | -74.77  | -75.19      | -66.97  |
|      |         | Es      | -83.99  | -83.76     | -83.13  | -85.34  | -77.44      | -109.17 |
|      | Fm      | -       | -78.70  | -87.44     | -86.96  | -84.93  | -120.18     |         |
|      | Md      | -93.78  | -111.05 | -112.72    | -111.96 | -110.71 | -114.51     |         |
|      | No      | -141.57 | -141.92 | -143.61    | -143.00 | -141.96 | -151.98     |         |
|      | Lr      | -73.51  | -73.28  | -72.72     | -74.32  | -73.92  | -72.56      |         |
|      | nd      | Th      | -19.77  | -19.12     | -20.06  | -20.39  | -20.49      | -27.39  |
|      |         | Pa      | -15.88  | -15.47     | -17.75  | -18.21  | -18.49      | -46.38  |
|      |         | U       | -37.13  | -36.77     | -37.16  | -37.61  | -37.48      | -62.90  |
|      |         | Np      | -45.80  | -44.38     | -44.67  | -45.13  | -46.09      | -72.61  |
|      |         | Pu      | -55.01  | -54.13     | -54.64  | -55.16  | -53.46      | -73.06  |
|      |         | Am      | -63.79  | -64.18     | -64.14  | -64.01  | -63.37      | -48.59  |
| Cm   |         | -51.89  | -51.76  | -51.84     | -52.19  | -51.74  | -51.08      |         |
| Bk   |         | -63.77  | -65.32  | -64.06     | -65.91  | -66.03  | -61.61      |         |
| Cf   |         | -69.00  | -68.82  | -68.00     | -69.85  | -70.19  | -66.97      |         |
| Es   |         | -84.68  | -84.62  | -78.13     | -85.71  | -77.71  | -109.17     |         |
| Fm   | -86.68  | -       | -88.20  | -86.49     | -85.02  | -120.18 |             |         |
| Md   | -111.53 | -108.80 | -       | -112.43    | -111.45 | -114.51 |             |         |
| No   | -142.48 | -143.11 | -144.84 | -143.36    | -142.25 | -151.98 |             |         |
| Lr   | -72.22  | -71.55  | -73.15  | -73.94     | -73.94  | -72.56  |             |         |
| M06  | ad      | Th      | -21.06  | -20.77     | -20.25  | -21.18  | -20.87      | -27.39  |
|      |         | Pa      | -15.82  | -16.21     | -18.33  | -15.72  | -18.46      | -46.38  |
|      |         | U       | -32.26  | -31.08     | -32.10  | -28.14  | -           | -62.90  |
|      |         | Np      | -       | -          | -       | -       | -           | -72.61  |
|      |         | Pu      | -48.54  | -48.00     | -38.33  | -49.88  | -49.90      | -73.06  |
|      |         | Am      | -56.81  | -57.15     | -56.75  | -57.56  | -57.18      | -48.59  |
|      |         | Cm      | -47.49  | -47.31     | -47.44  | -48.46  | -48.14      | -51.08  |
|      |         | Bk      | -59.10  | -57.22     | -60.92  | -61.45  | -60.58      | -61.61  |
|      |         | Cf      | -66.17  | -65.75     | -66.63  | -68.17  | -           | -66.97  |
|      |         | Es      | -68.71  | -68.56     | -69.18  | -70.70  | -           | -109.17 |
|      | Fm      | -84.41  | -84.67  | -84.16     | -83.95  | -83.26  | -120.18     |         |
|      | Md      | -108.88 | -104.72 | -110.90    | -110.63 | -110.80 | -114.51     |         |
|      | No      | -128.89 | -129.59 | -131.39    | -131.38 | -113.84 | -151.98     |         |
|      | Lr      | -69.45  | -69.31  | -69.02     | -70.73  | -70.42  | -72.56      |         |
|      | nd      | Th      | -17.15  | -16.62     | -17.77  | -15.70  | -18.36      | -27.39  |
|      |         | Pa      | -16.49  | -14.42     | -16.76  | -16.20  | -17.30      | -46.38  |
|      |         | U       | -33.09  | -33.07     | -       | -34.19  | -26.46      | -62.90  |
|      |         | Np      | -       | -          | -       | -       | -           | -72.61  |
|      |         | Pu      | -52.21  | -51.88     | -51.92  | -52.81  | -52.04      | -73.06  |
|      |         | Am      | -61.62  | -61.97     | -62.20  | -62.47  | -62.11      | -48.59  |
| Cm   |         | -47.92  | -47.85  | -48.20     | -48.68  | -48.35  | -51.08      |         |
| Bk   |         | -60.46  | -       | -61.20     | -       | -62.52  | -61.61      |         |
| Cf   |         | -71.41  | -71.22  | -69.25     | -72.82  | -       | -66.97      |         |
| Es   |         | -67.99  | -71.68  | -69.92     | -       | -69.00  | -109.17     |         |
| Fm   | -84.29  | -82.63  | -83.70  | -          | -83.36  | -120.18 |             |         |
| Md   | -109.38 | -105.82 | -107.61 | -93.73     | -93.55  | -114.51 |             |         |
| No   | -129.90 | -130.80 | -132.47 | -131.76    | -131.25 | -151.98 |             |         |
| Lr   | -68.13  | -67.56  | -69.29  | -70.39     | -70.45  | -72.56  |             |         |

Table S.16:  $\Delta(\Delta G)_{rxn}$  for  $[An(NO_3)]^{2+}$  normalized to Ac calculated with M11 with the Stuttgart RSC 1997 ECP and basis set including (ad) and excluding (nd) the most diffuse basis functions for An, and the 6-31G\*, cc-pVDZ, 6-311++G\*\*, cc-pVTZ, and cc-pVQZ for N and O.  $\Delta(\Delta G)_{rxn}$  calculated with CCSD(T)-FC1 includes the cc-pV $\infty$ Z-X2C basis set for An, and the cc-pV $\infty$ Z-DK basis set for N and O is included as reference (indicated as CCSD(T)/CBS). Values reported in kcal mol<sup>-1</sup>. [ $\Delta(\Delta G)_{rxn} = \Delta G_{rxn,An} - \Delta G_{rxn,Ac}$ , as indicated in Eq. 5.a; with An = Th - Lr].

|     |         |         | 6-31G*  | cc-pVDZ | 6-311++G** | cc-pVTZ | cc-pVQZ | CCSD(T)/CBS |
|-----|---------|---------|---------|---------|------------|---------|---------|-------------|
| M11 | ad      | Th      | -19.27  | -18.15  | -18.25     | -18.14  | -19.26  | -27.39      |
|     |         | Pa      | -13.82  | -11.20  | -3.69      | -1.35   | -       | -46.38      |
|     |         | U       | -35.19  | -       | -33.03     | -36.20  | -33.12  | -62.90      |
|     |         | Np      | -       | -       | -          | -       | -       | -72.61      |
|     |         | Pu      | -49.93  | -53.91  | -49.62     | -50.72  | -       | -73.06      |
|     |         | Am      | -       | -       | -          | -       | -       | -48.59      |
|     |         | Cm      | -46.09  | -46.22  | -45.70     | -46.60  | -46.29  | -51.08      |
|     |         | Bk      | -50.23  | -51.36  | -45.96     | -53.23  | -52.98  | -61.61      |
|     |         | Cf      | -       | -       | -38.89     | -58.00  | -       | -66.97      |
|     |         | Es      | -72.10  | -68.82  | -68.42     | -79.50  | -70.88  | -109.17     |
|     |         | Fm      | -       | -       | -          | -       | -       | -120.18     |
|     |         | Md      | -110.73 | -103.39 | -          | -113.67 | -107.36 | -114.51     |
|     | No      | -141.13 | -141.42 | -131.51 | -131.23    | -143.06 | -151.98 |             |
|     | Lr      | -71.24  | -71.24  | -70.20  | -71.90     | -71.52  | -72.56  |             |
|     | nd      | Th      | -18.09  | -16.62  | -18.22     | -       | -19.01  | -27.39      |
|     |         | Pa      | -14.56  | -14.38  | -9.98      | -26.30  | -16.53  | -46.38      |
|     |         | U       | -34.78  | -35.54  | -31.81     | -35.98  | -31.23  | -62.90      |
|     |         | Np      | -       | -       | -          | -       | -       | -72.61      |
|     |         | Pu      | -50.01  | -50.54  | -39.80     | -42.57  | -       | -73.06      |
|     |         | Am      | -       | -       | -          | -       | -       | -48.59      |
|     |         | Cm      | -46.62  | -46.94  | -46.47     | -46.87  | -46.51  | -51.08      |
|     |         | Bk      | -       | -50.46  | -50.54     | -51.00  | -50.63  | -61.61      |
|     |         | Cf      | -52.10  | -56.30  | -52.32     | -59.89  | -       | -66.97      |
|     |         | Es      | -       | -       | -          | -60.17  | -67.33  | -109.17     |
| Fm  |         | -       | -       | -       | -          | -       | -120.18 |             |
| Md  |         | -111.93 | -112.66 | -114.62 | -114.14    | -102.81 | -114.51 |             |
| No  | -129.99 | -130.76 | -132.61 | -131.49 | -143.31    | -151.98 |         |             |
| Lr  | -69.82  | -69.26  | -70.39  | -71.59  | -71.57     | -72.56  |         |             |

Table S.17: Difference between predicted Gibbs free energy of reaction for  $[\text{An}(\text{NO}_3)]^{2+}$  [with An = Ac to Lr] amongst contiguous actinides calculated with LDA, TPSS, B3LYP, PBE0, B972, M06 and M11, the Stuttgart RSC 1997 ECP and associated basis set including all diffuse functions (ad) and excluding the most diffuse functions in the An basis set, and the 6-31G\*, cc-pVDZ, 6-311++G\*\*, cc-pVTZ, and cc-pVQZ for N and O with respect to the predicted energy with CCSD(T)-FC1/cc-pV $\infty$ Z-X2C:cc-pV $\infty$ Z-DK [CCSD(T)/CBS]. Values reported in kcal mol<sup>-1</sup>. [ $\Delta(\Delta G)_{\text{rxn An1/An2}} = \Delta G_{\text{rxn,An2}} - \Delta G_{\text{rxn,An1}}$ , as indicated in Eq. 5.a; with An = Ac - Lr.]

|       | An basis set | Functional | 6-31G* | cc-pVDZ | 6-311++G** | cc-pVTZ | cc-pVQZ |
|-------|--------------|------------|--------|---------|------------|---------|---------|
| Ac/Th | ad           | LDA        | -      | -       | -          | -       | -       |
|       |              | TPSS       | 3.74   | 4.05    | -          | 3.78    | 3.86    |
|       |              | B3LYP      | 6.39   | 4.13    | 5.81       | 4.61    | 4.13    |
|       |              | PBE0       | 3.85   | 4.20    | 5.15       | 3.81    | 3.89    |
|       |              | B972       | 6.46   | 6.74    | 7.64       | 6.55    | 6.75    |
|       |              | M06        | 6.33   | 6.62    | 7.13       | 6.21    | 6.52    |
|       |              | M11        | 8.12   | 9.24    | 9.14       | 9.25    | 8.13    |
|       | nd           | LDA        | -      | -       | -          | -       | -       |
|       |              | TPSS       | 3.19   | 3.84    | -          | 2.53    | 2.31    |
|       |              | B3LYP      | 5.23   | 5.92    | 5.04       | 4.62    | 4.77    |
|       |              | PBE0       | 5.02   | -       | 4.94       | 4.32    | 4.10    |
|       |              | B972       | 7.62   | 8.27    | 7.33       | 7.00    | 6.90    |
|       |              | M06        | 10.23  | 10.77   | 9.62       | 11.69   | 9.03    |
|       |              | M11        | 9.30   | 10.77   | 9.16       | -       | 8.38    |
| Th/Pa | ad           | LDA        | -      | -       | -          | -       | -       |
|       |              | TPSS       | 27.40  | 24.93   | -          | -       | -       |
|       |              | B3LYP      | 20.86  | 23.19   | 20.58      | 21.65   | 21.59   |
|       |              | PBE0       | 24.99  | 25.23   | 23.25      | 23.97   | 22.85   |
|       |              | B972       | 22.65  | 22.95   | 20.16      | 20.52   | 19.48   |
|       |              | M06        | 24.24  | 23.55   | 20.92      | 24.46   | 21.40   |
|       |              | M11        | 24.45  | 25.95   | 33.56      | 35.78   | -       |
|       | nd           | LDA        | -      | -       | -          | -       | -       |
|       |              | TPSS       | -      | -       | -          | -       | 24.24   |
|       |              | B3LYP      | 22.53  | 24.41   | 22.55      | 22.78   | 22.12   |
|       |              | PBE0       | 24.77  | -       | 23.45      | 25.00   | 23.53   |
|       |              | B972       | 22.88  | 22.64   | 21.31      | 21.17   | 20.99   |
|       |              | M06        | 19.66  | 21.19   | 20.00      | 18.50   | 20.06   |
|       |              | M11        | 22.52  | 21.24   | 27.24      | -       | 21.48   |
| Pa/U  | ad           | LDA        | -5.00  | -       | -4.26      | -4.47   | -3.49   |
|       |              | TPSS       | -19.07 | -14.37  | -          | -       | -       |
|       |              | B3LYP      | -2.12  | -1.51   | -1.22      | -2.09   | -1.57   |
|       |              | PBE0       | -2.35  | -2.29   | -1.59      | -2.24   | -1.22   |
|       |              | B972       | -2.47  | -2.42   | -0.84      | -1.41   | -0.49   |
|       |              | M06        | 0.07   | 1.65    | 2.74       | 4.10    | -       |
|       |              | M11        | -4.86  | -       | -12.83     | -18.33  | -       |
|       | nd           | LDA        | -5.92  | -       | -5.89      | -5.04   | -3.08   |
|       |              | TPSS       | -      | -       | -2.85      | -       | -2.48   |
|       |              | B3LYP      | -2.49  | -4.79   | -2.37      | -2.40   | -1.91   |
|       |              | PBE0       | -2.02  | -4.06   | -2.64      | -3.97   | -0.22   |
|       |              | B972       | -4.73  | -4.78   | -2.90      | -2.89   | -2.47   |
|       |              | M06        | -0.09  | -2.13   | -          | -1.48   | 7.35    |
|       |              | M11        | -3.71  | -4.65   | -5.31      | 6.84    | 1.82    |

Table S.18: Difference between predicted Gibbs free energy of reaction for  $[An(NO_3)]^{2+}$  [with An = Ac to Lr] amongst contiguous actinides calculated with LDA, TPSS, B3LYP, PBE0, B972, M06 and M11, the Stuttgart RSC 1997 ECP and associated basis set including all diffuse functions (ad) and excluding the most diffuse functions in the An basis set, and the 6-31G\*, cc-pVDZ, 6-311++G\*\*, cc-pVTZ, and cc-pVQZ for N and O with respect to the predicted energy with CCSD(T)-FC1/cc-pV $\infty$ Z-X2C:cc-pV $\infty$ Z-DK [CCSD(T)/CBS]. Values reported in kcal mol<sup>-1</sup>.  $[\Delta(\Delta G)_{rxn, An1/An2} = \Delta G_{rxn, An2} - \Delta G_{rxn, An1}]$ , as indicated in Eq. 5.a; with An = Ac - Lr.]

|       | An basis set | Functional | 6-31G* | cc-pVDZ | 6-311++G** | cc-pVTZ | cc-pVQZ |
|-------|--------------|------------|--------|---------|------------|---------|---------|
| U/Np  | ad           | LDA        | 0.44   | -       | 0.46       | 0.07    | 0.51    |
|       |              | TPSS       | 17.01  | 13.43   | -          | -       | 15.52   |
|       |              | B3LYP      | -6.05  | -7.62   | -6.14      | -7.65   | -7.65   |
|       |              | PBE0       | 0.43   | 2.37    | 0.56       | 0.38    | 0.51    |
|       |              | B972       | 1.07   | 1.09    | 1.07       | 2.10    | 2.05    |
|       |              | M06        | -      | -       | -          | -       | 9.72    |
|       |              | M11        | -      | -       | -          | -       | -       |
|       | nd           | LDA        | -      | -       | 0.82       | 0.70    | 0.14    |
|       |              | TPSS       | -      | -       | 2.20       | 3.02    | 2.27    |
|       |              | B3LYP      | 3.07   | 4.61    | 3.38       | 4.69    | 4.55    |
|       |              | PBE0       | 0.93   | 0.92    | 1.06       | 0.96    | 4.72    |
|       |              | B972       | 1.04   | 2.11    | 2.20       | 2.20    | 1.10    |
|       |              | M06        | -      | -       | -          | -       | -       |
|       |              | M11        | -      | -       | -          | -       | -       |
| Np/Pu | ad           | LDA        | -12.38 | -12.02  | -11.30     | -11.61  | -11.23  |
|       |              | TPSS       | -14.63 | -13.33  | -          | -       | -       |
|       |              | B3LYP      | -6.67  | -9.24   | -7.56      | -7.04   | -5.69   |
|       |              | PBE0       | -5.46  | -10.81  | -8.71      | -8.52   | -8.22   |
|       |              | B972       | -9.08  | -9.46   | 1.79       | -8.56   | -8.24   |
|       |              | M06        | -      | -       | -          | -       | -       |
|       |              | M11        | -      | -       | -          | -       | -       |
|       | nd           | LDA        | -      | -11.57  | -11.33     | -11.71  | -11.32  |
|       |              | TPSS       | -      | -       | -10.13     | -10.96  | -9.90   |
|       |              | B3LYP      | -10.43 | -12.18  | -10.06     | -11.58  | 1.27    |
|       |              | PBE0       | -9.07  | -8.05   | 3.50       | -7.52   | -4.03   |
|       |              | B972       | -8.76  | -9.31   | -9.52      | -9.59   | -6.93   |
|       |              | M06        | -      | -       | -          | -       | -       |
|       |              | M11        | -      | -       | -          | -       | -       |
| Pu/Am | ad           | LDA        | -36.46 | -       | -          | -36.21  | -35.99  |
|       |              | TPSS       | -      | -       | -          | -       | -24.47  |
|       |              | B3LYP      | -27.09 | -23.95  | -25.42     | -24.07  | -24.89  |
|       |              | PBE0       | -34.32 | -31.84  | -30.82     | -30.41  | -30.25  |
|       |              | B972       | -33.80 | -34.42  | -44.48     | -34.45  | -34.11  |
|       |              | M06        | -32.74 | -33.63  | -42.89     | -32.15  | -31.75  |
|       |              | M11        | -      | -       | -          | -       | -       |
|       | nd           | LDA        | -35.93 | -37.13  | -37.05     | -36.09  | -35.94  |
|       |              | TPSS       | -34.09 | -34.56  | -          | -34.24  | -34.08  |
|       |              | B3LYP      | -32.69 | -33.09  | -33.28     | -32.91  | -45.10  |
|       |              | PBE0       | -36.07 | -35.75  | -46.84     | -35.50  | -44.25  |
|       |              | B972       | -33.25 | -34.52  | -33.97     | -33.33  | -34.38  |
|       |              | M06        | -33.89 | -34.56  | -34.75     | -34.14  | -34.54  |
|       |              | M11        | -      | -       | -          | -       | -       |

Table S.19: Difference between predicted Gibbs free energy of reaction for  $[\text{An}(\text{NO}_3)_2]^{2+}$  [with An = Ac to Lr] amongst contiguous actinides calculated with LDA, TPSS, B3LYP, PBE0, B972, M06 and M11, the Stuttgart RSC 1997 ECP and associated basis set including all diffuse functions (ad) and excluding the most diffuse functions in the An basis set, and the 6-31G\*, cc-pVDZ, 6-311++G\*\*, cc-pVTZ, and cc-pVQZ for N and O with respect to the predicted energy with CCSD(T)-FC1/cc-pV $\infty$ Z-X2C:cc-pV $\infty$ Z-DK [CCSD(T)/CBS]. Values reported in kcal mol<sup>-1</sup>. [ $\Delta(\Delta G)_{\text{rxn An1/An2}} = \Delta G_{\text{rxn,An2}} - \Delta G_{\text{rxn,An1}}$ , as indicated in Eq. 5.a; with An = Ac - Lr.]

|       | An basis set | Functional | 6-31G* | cc-pVDZ | 6-311++G** | cc-pVTZ | cc-pVQZ |
|-------|--------------|------------|--------|---------|------------|---------|---------|
| Am/Cm | ad           | LDA        | 17.24  | -       | -          | 16.88   | 16.65   |
|       |              | TPSS       | -      | -       | -          | -       | -       |
|       |              | B3LYP      | 11.90  | 12.45   | 11.73      | 11.58   | 11.38   |
|       |              | PBE0       | 12.31  | 12.85   | 12.18      | 12.02   | 11.86   |
|       |              | B972       | 14.76  | 15.40   | 14.83      | 14.40   | 14.15   |
|       |              | M06        | 11.81  | 12.34   | 11.80      | 11.59   | 11.54   |
|       |              | M11        | -      | -       | -          | -       | -       |
|       | nd           | LDA        | 16.85  | 17.31   | 17.17      | 16.80   | 16.65   |
|       |              | TPSS       | 14.20  | 14.67   | -          | 14.17   | 14.01   |
|       |              | B3LYP      | 11.49  | 11.91   | 11.69      | 11.49   | 11.35   |
|       |              | PBE0       | 15.45  | 15.87   | 15.65      | 15.45   | 15.36   |
|       |              | B972       | 14.39  | 14.92   | 14.79      | 14.31   | 14.12   |
|       |              | M06        | 16.20  | 16.61   | 16.49      | 16.28   | 16.26   |
|       |              | M11        | -      | -       | -          | -       | -       |
| Cm/Bk | ad           | LDA        | -0.61  | -0.37   | -1.22      | -1.41   | -1.70   |
|       |              | TPSS       | -1.76  | -0.28   | -          | -2.67   | -2.90   |
|       |              | B3LYP      | -0.79  | -0.54   | -3.07      | -1.78   | -3.21   |
|       |              | PBE0       | -1.14  | 0.33    | -0.45      | -2.06   | -2.70   |
|       |              | B972       | -0.88  | -2.42   | -1.39      | -0.96   | -3.71   |
|       |              | M06        | -1.07  | 0.62    | -2.95      | -2.45   | -1.91   |
|       |              | M11        | 6.39   | 5.39    | 10.27      | 3.90    | 3.84    |
|       | nd           | LDA        | -0.80  | -0.85   | -1.26      | -1.54   | -1.76   |
|       |              | TPSS       | -2.26  | -3.09   | -2.98      | -3.61   | -2.95   |
|       |              | B3LYP      | -1.39  | -1.28   | -1.46      | -1.95   | -3.27   |
|       |              | PBE0       | -1.64  | -0.29   | -0.74      | -2.17   | -2.74   |
|       |              | B972       | -1.35  | -3.03   | -1.69      | -3.19   | -3.75   |
|       |              | M06        | -2.01  | -       | -2.46      | -       | -3.64   |
|       |              | M11        | -      | 7.02    | 6.46       | 6.40    | 6.42    |
| Bk/Cf | ad           | LDA        | -2.95  | -3.04   | -3.12      | -2.96   | -2.91   |
|       |              | TPSS       | -1.99  | -       | -          | -1.96   | -1.92   |
|       |              | B3LYP      | 2.90   | 2.53    | 4.42       | 2.93    | 4.08    |
|       |              | PBE0       | 1.62   | -0.09   | 4.44       | 1.11    | 1.92    |
|       |              | B972       | -3.68  | -3.43   | -6.32      | -5.99   | -4.09   |
|       |              | M06        | -1.72  | -3.17   | -0.36      | -1.36   | -       |
|       |              | M11        | -      | -       | 12.42      | 0.59    | -       |
|       | nd           | LDA        | -3.34  | -3.35   | -3.20      | -2.99   | -2.90   |
|       |              | TPSS       | -1.53  | -0.80   | -1.40      | 0.02    | -1.47   |
|       |              | B3LYP      | 2.03   | 0.07    | -0.55      | 0.44    | 0.99    |
|       |              | PBE0       | 1.17   | -0.09   | 4.46       | 1.66    | 1.93    |
|       |              | B972       | 0.13   | 1.85    | 1.42       | 1.42    | 1.19    |
|       |              | M06        | -5.59  | -       | -2.69      | -       | -       |
|       |              | M11        | -      | -0.49   | 3.58       | -3.53   | -       |

Table S.20: Difference between predicted Gibbs free energy of reaction for  $[\text{An}(\text{NO}_3)]^{2+}$  [with An = Ac to Lr] amongst contiguous actinides calculated with LDA, TPSS, B3LYP, PBE0, B972, M06 and M11, the Stuttgart RSC 1997 ECP and associated basis set including all diffuse functions (ad) and excluding the most diffuse functions in the An basis set, and the 6-31G\*, cc-pVDZ, 6-311++G\*\*, cc-pVTZ, and cc-pVQZ for N and O with respect to the predicted energy with CCSD(T)-FC1/cc-pV $\infty$ Z-X2C:cc-pV $\infty$ Z-DK [CCSD(T)/CBS]. Values reported in kcal mol<sup>-1</sup>.  $[\Delta(\Delta G)_{\text{rxn An1/An2}} = \Delta G_{\text{rxn,An2}} - \Delta G_{\text{rxn,An1}}$ , as indicated in Eq. 5.a; with An = Ac - Lr.]

|       | An basis set | Functional | 6-31G* | cc-pVDZ | 6-311++G** | cc-pVTZ | cc-pVQZ |
|-------|--------------|------------|--------|---------|------------|---------|---------|
| Cf/Es | ad           | LDA        | 33.12  | -       | 32.69      | 33.01   | 33.17   |
|       |              | TPSS       | 24.15  | -       | -          | 24.05   | 24.44   |
|       |              | B3LYP      | 12.51  | 13.94   | 20.02      | 13.79   | 20.30   |
|       |              | PBE0       | 39.07  | 38.76   | 34.07      | 39.51   | 38.59   |
|       |              | B972       | 30.14  | 31.39   | 33.56      | 31.62   | 39.95   |
|       |              | M06        | 39.66  | 39.39   | 39.66      | 39.67   | 42.20   |
|       |              | M11        | -      | -       | 12.67      | 20.71   | -       |
|       | nd           | LDA        | 32.48  | -       | 31.99      | 32.76   | 32.96   |
|       |              | TPSS       | 25.28  | -       | 28.16      | -       | 23.77   |
|       |              | B3LYP      | 24.50  | 25.70   | 28.86      | 25.52   | 26.32   |
|       |              | PBE0       | 16.03  | 16.96   | 11.10      | 15.42   | 18.27   |
|       |              | B972       | 26.52  | 26.40   | 32.07      | 26.34   | 34.68   |
|       |              | M06        | 45.63  | 41.73   | 41.53      | -       | -       |
|       |              | M11        | -      | -       | -          | 41.92   | -       |
| Es/Fm | ad           | LDA        | -9.79  | -       | -8.47      | -8.06   | -7.50   |
|       |              | TPSS       | -      | -       | -          | 14.81   | 16.44   |
|       |              | B3LYP      | -      | -       | 21.07      | 29.15   | 23.86   |
|       |              | PBE0       | 7.32   | 6.61    | 4.86       | 6.07    | 8.15    |
|       |              | B972       | -      | 16.07   | 6.71       | 9.39    | 3.52    |
|       |              | M06        | -4.68  | -5.10   | -3.97      | -2.23   | -       |
|       |              | M11        | -      | -       | -          | -       | -       |
|       | nd           | LDA        | -6.25  | -       | -6.14      | -6.10   | -5.82   |
|       |              | TPSS       | 14.15  | -       | -          | -       | 16.72   |
|       |              | B3LYP      | -      | 18.82   | 15.84      | 20.38   | 21.05   |
|       |              | PBE0       | 29.61  | 27.53   | 28.31      | 30.11   | 28.66   |
|       |              | B972       | 9.01   | -       | 0.94       | 10.23   | 3.70    |
|       |              | M06        | -5.29  | 0.07    | -2.77      | -       | -3.34   |
|       |              | M11        | -      | -       | -          | -       | -       |
| Fm/Md | ad           | LDA        | -13.74 | -11.83  | -15.79     | -15.66  | -       |
|       |              | TPSS       | -      | -5.67   | -          | -       | -       |
|       |              | B3LYP      | -      | -       | -29.87     | -30.09  | -30.52  |
|       |              | PBE0       | -30.94 | -30.16  | -29.60     | -29.60  | -30.11  |
|       |              | B972       | -      | -38.01  | -30.95     | -30.66  | -31.45  |
|       |              | M06        | -30.14 | -25.71  | -32.41     | -32.36  | -33.21  |
|       |              | M11        | -      | -       | -          | -       | -       |
|       | nd           | LDA        | -15.75 | -16.33  | -16.57     | -       | -17.11  |
|       |              | TPSS       | -21.15 | -       | -          | -30.13  | -       |
|       |              | B3LYP      | -      | -24.59  | -30.45     | -30.45  | -30.77  |
|       |              | PBE0       | -30.62 | -30.31  | -31.14     | -31.08  | -31.17  |
|       |              | B972       | -30.52 | -       | -          | -31.61  | -32.10  |
|       |              | M06        | -30.76 | -28.86  | -29.57     | -       | -15.87  |
|       |              | M11        | -      | -       | -          | -       | -       |

Table S.21: Difference between predicted Gibbs free energy of reaction for  $[\text{An}(\text{NO}_3)_2]^{2+}$  [with An = Ac to Lr] amongst contiguous actinides calculated with LDA, TPSS, B3LYP, PBE0, B972, M06 and M11, the Stuttgart RSC 1997 ECP and associated basis set including all diffuse functions (ad) and excluding the most diffuse functions in the An basis set, and the 6-31G\*, cc-pVDZ, 6-311++G\*\*, cc-pVTZ, and cc-pVQZ for N and O with respect to the predicted energy with CCSD(T)-FC1/cc-pV $\infty$ Z-X2C:cc-pV $\infty$ Z-DK [CCSD(T)/CBS]. Values reported in kcal mol<sup>-1</sup>. [ $\Delta(\Delta G)_{\text{rxn An1/An2}} = \Delta G_{\text{rxn,An2}} - \Delta G_{\text{rxn,An1}}$ , as indicated in Eq. 5.a; with An = Ac - Lr.]

|       | An basis set | Functional | 6-31G* | cc-pVDZ | 6-311++G** | cc-pVTZ | cc-pVQZ |
|-------|--------------|------------|--------|---------|------------|---------|---------|
| No/Lr | ad           | LDA        | -18.18 | -18.06  | -15.74     | -17.37  | -17.48  |
|       |              | TPSS       | -23.50 | -23.07  | -          | -22.83  | -       |
|       |              | B3LYP      | -24.77 | -24.45  | -21.50     | -23.45  | -23.73  |
|       |              | PBE0       | -23.25 | -22.74  | -20.44     | -22.62  | -23.27  |
|       |              | B972       | -11.36 | -10.78  | -8.53      | -10.74  | -11.37  |
|       |              | M06        | -19.97 | -19.14  | -17.05     | -18.77  | -36.01  |
|       |              | M11        | -9.53  | -9.23   | -18.11     | -20.09  | -7.88   |
|       | nd           | LDA        | -20.22 | -       | -          | -       | -21.81  |
|       |              | TPSS       | -      | -       | -20.08     | -       | -23.01  |
|       |              | B3LYP      | -22.12 | -20.98  | -20.63     | -22.55  | -23.41  |
|       |              | PBE0       | -20.96 | -19.73  | -19.60     | -21.84  | -22.99  |
|       |              | B972       | -9.16  | -7.86   | -7.73      | -9.99   | -11.11  |
|       |              | M06        | -17.65 | -16.17  | -16.24     | -18.04  | -18.63  |
|       |              | M11        | -19.24 | -17.92  | -17.19     | -19.52  | -7.68   |

Table S.22: Percentage contribution of enthalpy and entropy terms to the Gibbs free energy of reaction in  $[An(NO_3)_2]^{2+}$  with An = Ac to Np] calculated with LDA, TPSS, B3LYP, PBE0, B972, M06, and M11, the Stuttgart RSC 1997 ECP and associated basis set including all basis functions for the actinides, and the 6-31G\*, cc-pVDZ, 6-311++G\*\*, cc-pVTZ, and cc-pVQZ basis set for the non-actinide atoms. [Calculated as  $\Delta H/\Delta G \times 100$  and  $T \cdot \Delta S \times 100$ ]

| Functional | Non-An basis set | Ac               |                           | Th               |                           | Pa               |                           | U                |                           | Np               |                           |
|------------|------------------|------------------|---------------------------|------------------|---------------------------|------------------|---------------------------|------------------|---------------------------|------------------|---------------------------|
|            |                  | $\Delta H_{rxn}$ | $-T \cdot \Delta S_{rxn}$ |
| LDA        | 6-31G*           | 99.12%           | 0.88%                     | -                | -                         | 99.25%           | 0.75%                     | 99.28%           | 0.72%                     | 99.30%           | 0.70%                     |
|            | cc-pVDZ          | 99.12%           | 0.88%                     | -                | -                         | 99.25%           | 0.75%                     | -                | -                         | 99.30%           | 0.70%                     |
|            | 6-311++G**       | 99.05%           | 0.95%                     | -                | -                         | 99.20%           | 0.80%                     | 99.23%           | 0.77%                     | 99.25%           | 0.75%                     |
|            | cc-pVTZ          | 99.08%           | 0.92%                     | -                | -                         | 99.22%           | 0.78%                     | 99.26%           | 0.74%                     | 99.28%           | 0.72%                     |
|            | cc-pVQZ          | 99.07%           | 0.93%                     | -                | -                         | 99.22%           | 0.78%                     | 99.25%           | 0.75%                     | 99.27%           | 0.73%                     |
| TPSS       | 6-31G*           | 99.07%           | 0.93%                     | 99.12%           | 0.88%                     | 99.10%           | 0.90%                     | 99.17%           | 0.83%                     | 99.17%           | 0.83%                     |
|            | cc-pVDZ          | 99.07%           | 0.93%                     | 99.11%           | 0.89%                     | 99.12%           | 0.88%                     | 99.17%           | 0.83%                     | 99.17%           | 0.83%                     |
|            | cc-pVTZ          | 99.04%           | 0.96%                     | 99.09%           | 0.91%                     | -                | -                         | -                | -                         | -                | -                         |
|            | cc-pVQZ          | 99.04%           | 0.96%                     | 99.09%           | 0.91%                     | -                | -                         | 99.15%           | 0.85%                     | 99.17%           | 0.83%                     |
| B3LYP      | 6-31G*           | 99.07%           | 0.93%                     | 99.11%           | 0.89%                     | 99.13%           | 0.87%                     | 99.15%           | 0.85%                     | 99.20%           | 0.80%                     |
|            | cc-pVDZ          | 99.07%           | 0.93%                     | 99.11%           | 0.89%                     | 99.13%           | 0.87%                     | 99.15%           | 0.85%                     | 99.19%           | 0.81%                     |
|            | 6-311++G**       | 99.00%           | 1.00%                     | 99.05%           | 0.95%                     | 99.07%           | 0.93%                     | 99.09%           | 0.91%                     | 99.13%           | 0.87%                     |
|            | cc-pVTZ          | 99.03%           | 0.97%                     | 99.09%           | 0.91%                     | 99.09%           | 0.91%                     | 99.13%           | 0.87%                     | 99.17%           | 0.83%                     |
|            | cc-pVQZ          | 99.03%           | 0.97%                     | 99.09%           | 0.91%                     | 99.08%           | 0.92%                     | 99.13%           | 0.87%                     | 99.17%           | 0.83%                     |
| PBE0       | 6-31G*           | 99.08%           | 0.92%                     | 99.13%           | 0.87%                     | 99.12%           | 0.88%                     | 99.17%           | 0.83%                     | 99.20%           | 0.80%                     |
|            | cc-pVDZ          | 99.08%           | 0.92%                     | 99.13%           | 0.87%                     | 99.12%           | 0.88%                     | 99.16%           | 0.84%                     | 99.18%           | 0.82%                     |
|            | 6-311++G**       | 99.03%           | 0.97%                     | 99.08%           | 0.92%                     | 99.08%           | 0.92%                     | 99.12%           | 0.88%                     | 99.16%           | 0.84%                     |
|            | cc-pVTZ          | 99.06%           | 0.94%                     | 99.12%           | 0.88%                     | 99.11%           | 0.89%                     | 99.15%           | 0.85%                     | 99.18%           | 0.82%                     |
|            | cc-pVQZ          | 99.05%           | 0.95%                     | 99.12%           | 0.88%                     | 99.10%           | 0.90%                     | 99.15%           | 0.85%                     | 99.18%           | 0.82%                     |
| B972       | 6-31G*           | 99.07%           | 0.93%                     | 99.11%           | 0.89%                     | 99.12%           | 0.88%                     | 99.16%           | 0.84%                     | 99.19%           | 0.81%                     |
|            | cc-pVDZ          | 99.07%           | 0.93%                     | 99.10%           | 0.90%                     | 99.12%           | 0.88%                     | 99.15%           | 0.85%                     | 99.18%           | 0.82%                     |
|            | 6-311++G**       | 99.02%           | 0.98%                     | 99.05%           | 0.95%                     | 99.06%           | 0.94%                     | 99.10%           | 0.90%                     | 99.14%           | 0.86%                     |
|            | cc-pVTZ          | 99.04%           | 0.96%                     | 99.09%           | 0.91%                     | 99.10%           | 0.90%                     | 99.14%           | 0.86%                     | 99.17%           | 0.83%                     |
|            | cc-pVQZ          | 99.04%           | 0.96%                     | 99.09%           | 0.91%                     | 99.08%           | 0.92%                     | 99.13%           | 0.87%                     | 99.17%           | 0.83%                     |
| M06        | 6-31G*           | 99.06%           | 0.94%                     | 99.10%           | 0.90%                     | 99.10%           | 0.90%                     | 99.14%           | 0.86%                     | -                | -                         |
|            | cc-pVDZ          | 99.06%           | 0.94%                     | 99.10%           | 0.90%                     | 99.10%           | 0.90%                     | 99.13%           | 0.87%                     | -                | -                         |
|            | 6-311++G**       | 99.00%           | 1.00%                     | 99.05%           | 0.95%                     | 99.07%           | 0.93%                     | 99.08%           | 0.92%                     | -                | -                         |
|            | cc-pVTZ          | 99.04%           | 0.96%                     | 99.09%           | 0.91%                     | 99.08%           | 0.92%                     | 99.11%           | 0.89%                     | -                | -                         |
|            | cc-pVQZ          | 99.04%           | 0.96%                     | 99.09%           | 0.91%                     | 99.08%           | 0.92%                     | -                | -                         | -                | -                         |
| M11        | 6-31G*           | 99.07%           | 0.93%                     | 99.12%           | 0.88%                     | 99.12%           | 0.88%                     | 99.15%           | 0.85%                     | -                | -                         |
|            | cc-pVDZ          | 99.07%           | 0.93%                     | 99.11%           | 0.89%                     | 99.10%           | 0.90%                     | -                | -                         | -                | -                         |
|            | 6-311++G**       | 99.01%           | 0.99%                     | 99.06%           | 0.94%                     | 99.03%           | 0.97%                     | 99.09%           | 0.91%                     | -                | -                         |
|            | cc-pVTZ          | 99.03%           | 0.97%                     | 99.07%           | 0.93%                     | 99.04%           | 0.96%                     | 99.11%           | 0.89%                     | -                | -                         |
|            | cc-pVQZ          | 99.03%           | 0.97%                     | 99.09%           | 0.91%                     | -                | -                         | 99.11%           | 0.89%                     | -                | -                         |



Table S.23: Percentage contribution of enthalpy and entropy terms to the Gibbs free energy of reaction in  $[\text{An}(\text{NO}_3)_2]^{2+}$  with An = Pu to Cf] calculated with LDA, TPSS, B3LYP, PBE0, B972, M06, and M11, the Stuttgart RSC 1997 ECP and associated basis set including all basis functions for the actinides, and the 6-31G\*, cc-pVDZ, 6-311++G\*\*, cc-pVTZ, and cc-pVQZ basis set for the non-actinide atoms. [Calculated as  $\Delta H/\Delta G \times 100$  and  $T \cdot \Delta S \times 100$ ]

| Functional | Non-An basis set | Pu                      |                                  | Am                      |                                  | Cm                      |                                  | Bk                      |                                  | Cf                      |                                  |
|------------|------------------|-------------------------|----------------------------------|-------------------------|----------------------------------|-------------------------|----------------------------------|-------------------------|----------------------------------|-------------------------|----------------------------------|
|            |                  | $\Delta H_{\text{rxn}}$ | $-T \cdot \Delta S_{\text{rxn}}$ |
| LDA        | 6-31G*           | 99.32%                  | 0.68%                            | 99.21%                  | 0.79%                            | 99.22%                  | 0.78%                            | 99.31%                  | 0.69%                            | 99.33%                  | 0.67%                            |
|            | cc-pVDZ          | 99.31%                  | 0.69%                            | -                       | -                                | 99.22%                  | 0.78%                            | 99.32%                  | 0.68%                            | 99.33%                  | 0.67%                            |
|            | 6-311++G**       | 99.25%                  | 0.75%                            | -                       | -                                | 99.16%                  | 0.84%                            | 99.28%                  | 0.72%                            | 99.26%                  | 0.74%                            |
|            | cc-pVTZ          | 99.29%                  | 0.71%                            | 99.19%                  | 0.81%                            | 99.20%                  | 0.80%                            | 99.30%                  | 0.70%                            | 99.31%                  | 0.69%                            |
|            | cc-pVQZ          | 99.28%                  | 0.72%                            | 99.18%                  | 0.82%                            | 99.19%                  | 0.81%                            | 99.30%                  | 0.70%                            | 99.31%                  | 0.69%                            |
| TPSS       | 6-31G*           | 99.21%                  | 0.79%                            | -                       | -                                | 99.18%                  | 0.82%                            | 99.20%                  | 0.80%                            | 99.20%                  | 0.80%                            |
|            | cc-pVDZ          | 99.21%                  | 0.79%                            | -                       | -                                | 99.18%                  | 0.82%                            | 99.19%                  | 0.81%                            | -                       | -                                |
|            | cc-pVTZ          | 99.19%                  | 0.81%                            | -                       | -                                | 99.16%                  | 0.84%                            | 99.19%                  | 0.81%                            | 99.19%                  | 0.81%                            |
|            | cc-pVQZ          | -                       | -                                | -                       | -                                | 99.16%                  | 0.84%                            | 99.19%                  | 0.81%                            | 99.19%                  | 0.81%                            |
| B3LYP      | 6-31G*           | 99.20%                  | 0.80%                            | 99.20%                  | 0.80%                            | 99.18%                  | 0.82%                            | 99.20%                  | 0.80%                            | 99.20%                  | 0.80%                            |
|            | cc-pVDZ          | 99.22%                  | 0.78%                            | 99.20%                  | 0.80%                            | 99.18%                  | 0.82%                            | 99.20%                  | 0.80%                            | 99.21%                  | 0.79%                            |
|            | 6-311++G**       | 99.15%                  | 0.85%                            | 99.15%                  | 0.85%                            | 99.12%                  | 0.88%                            | 99.16%                  | 0.84%                            | 99.15%                  | 0.85%                            |
|            | cc-pVTZ          | 99.18%                  | 0.82%                            | 99.18%                  | 0.82%                            | 99.15%                  | 0.85%                            | 99.18%                  | 0.82%                            | 99.18%                  | 0.82%                            |
|            | cc-pVQZ          | 99.18%                  | 0.82%                            | 99.18%                  | 0.82%                            | 99.15%                  | 0.85%                            | 99.18%                  | 0.82%                            | 99.18%                  | 0.82%                            |
| PBE0       | 6-31G*           | 99.20%                  | 0.80%                            | 99.22%                  | 0.78%                            | 99.19%                  | 0.81%                            | 99.22%                  | 0.78%                            | 99.22%                  | 0.78%                            |
|            | cc-pVDZ          | 99.21%                  | 0.79%                            | 99.22%                  | 0.78%                            | 99.19%                  | 0.81%                            | 99.21%                  | 0.79%                            | 99.23%                  | 0.77%                            |
|            | 6-311++G**       | 99.18%                  | 0.82%                            | 99.17%                  | 0.83%                            | 99.14%                  | 0.86%                            | 99.17%                  | 0.83%                            | 99.18%                  | 0.82%                            |
|            | cc-pVTZ          | 99.20%                  | 0.80%                            | 99.20%                  | 0.80%                            | 99.17%                  | 0.83%                            | 99.20%                  | 0.80%                            | 99.22%                  | 0.78%                            |
|            | cc-pVQZ          | 99.20%                  | 0.80%                            | 99.20%                  | 0.80%                            | 99.17%                  | 0.83%                            | 99.20%                  | 0.80%                            | 99.20%                  | 0.80%                            |
| B972       | 6-31G*           | 99.21%                  | 0.79%                            | 99.19%                  | 0.81%                            | 99.18%                  | 0.82%                            | 99.20%                  | 0.80%                            | 99.21%                  | 0.79%                            |
|            | cc-pVDZ          | 99.21%                  | 0.79%                            | 99.19%                  | 0.81%                            | 99.17%                  | 0.83%                            | 99.20%                  | 0.80%                            | 99.21%                  | 0.79%                            |
|            | 6-311++G**       | 99.05%                  | 0.95%                            | 99.14%                  | 0.86%                            | 99.13%                  | 0.87%                            | 99.16%                  | 0.84%                            | 99.18%                  | 0.82%                            |
|            | cc-pVTZ          | 99.17%                  | 0.83%                            | 99.18%                  | 0.82%                            | 99.16%                  | 0.84%                            | 99.18%                  | 0.82%                            | 99.20%                  | 0.80%                            |
|            | cc-pVQZ          | 99.17%                  | 0.83%                            | 99.18%                  | 0.82%                            | 99.16%                  | 0.84%                            | 99.19%                  | 0.81%                            | 99.20%                  | 0.80%                            |
| M06        | 6-31G*           | 99.18%                  | 0.82%                            | 99.19%                  | 0.81%                            | 99.17%                  | 0.83%                            | 99.19%                  | 0.81%                            | 99.21%                  | 0.79%                            |
|            | cc-pVDZ          | 99.18%                  | 0.82%                            | 99.19%                  | 0.81%                            | 99.16%                  | 0.84%                            | 99.17%                  | 0.83%                            | 99.21%                  | 0.79%                            |
|            | 6-311++G**       | 99.10%                  | 0.90%                            | 99.14%                  | 0.86%                            | 99.11%                  | 0.89%                            | 99.15%                  | 0.85%                            | 99.17%                  | 0.83%                            |
|            | cc-pVTZ          | 99.17%                  | 0.83%                            | 99.18%                  | 0.82%                            | 99.15%                  | 0.85%                            | 99.19%                  | 0.81%                            | 99.20%                  | 0.80%                            |
|            | cc-pVQZ          | 99.17%                  | 0.83%                            | 99.18%                  | 0.82%                            | 99.15%                  | 0.85%                            | 99.18%                  | 0.82%                            | -                       | -                                |
| M11        | 6-31G*           | 99.20%                  | 0.80%                            | -                       | -                                | 99.18%                  | 0.82%                            | 99.19%                  | 0.81%                            | -                       | -                                |
|            | cc-pVDZ          | 99.21%                  | 0.79%                            | -                       | -                                | 99.18%                  | 0.82%                            | 99.20%                  | 0.80%                            | -                       | -                                |
|            | 6-311++G**       | 99.16%                  | 0.84%                            | -                       | -                                | 99.13%                  | 0.87%                            | 99.13%                  | 0.87%                            | 99.09%                  | 0.91%                            |
|            | cc-pVTZ          | 99.18%                  | 0.82%                            | -                       | -                                | 99.16%                  | 0.84%                            | 99.17%                  | 0.83%                            | 99.19%                  | 0.81%                            |
|            | cc-pVQZ          | -                       | -                                | -                       | -                                | 99.15%                  | 0.85%                            | 99.17%                  | 0.83%                            | -                       | -                                |

Table S.24: Percentage contribution of enthalpy and entropy terms to the Gibbs free energy of reaction in  $[An(NO_3)_2]^{2+}$  with An = Es to Lr] calculated with LDA, TPSS, B3LYP, PBE0, B972, M06, and M11, the Stuttgart RSC 1997 ECP and associated basis set including all basis functions for the actinides, and the 6-31G\*, cc-pVDZ, 6-311++G\*\*, cc-pVTZ, and cc-pVQZ basis set for the non-actinide atoms. [Calculated as  $\Delta H/\Delta G \times 100$  and  $T \cdot \Delta S \times 100$ ]

| Functional | Non-An basis set | Es               |                           | Fm               |                           | Md               |                           | No               |                           | Lr               |                           |
|------------|------------------|------------------|---------------------------|------------------|---------------------------|------------------|---------------------------|------------------|---------------------------|------------------|---------------------------|
|            |                  | $\Delta H_{rxn}$ | $-T \cdot \Delta S_{rxn}$ |
| LDA        | 6-31G*           | 99.33%           | 0.67%                     | 99.32%           | 0.68%                     | 99.30%           | 0.70%                     | 99.21%           | 0.79%                     | 99.28%           | 0.72%                     |
|            | cc-pVDZ          | -                | -                         | 99.32%           | 0.68%                     | 99.30%           | 0.70%                     | 99.21%           | 0.79%                     | 99.28%           | 0.72%                     |
|            | 6-311++G**       | 99.29%           | 0.71%                     | 99.28%           | 0.72%                     | 99.26%           | 0.74%                     | 99.15%           | 0.85%                     | 99.23%           | 0.77%                     |
|            | cc-pVTZ          | 99.31%           | 0.69%                     | 99.31%           | 0.69%                     | 99.28%           | 0.72%                     | 99.18%           | 0.82%                     | 99.26%           | 0.74%                     |
|            | cc-pVQZ          | 99.30%           | 0.70%                     | 99.30%           | 0.70%                     | -                | -                         | 99.18%           | 0.82%                     | 99.25%           | 0.75%                     |
| TPSS       | 6-31G*           | 99.24%           | 0.76%                     | -                | -                         | 99.06%           | 0.94%                     | 99.07%           | 0.93%                     | 99.23%           | 0.77%                     |
|            | cc-pVDZ          | 99.19%           | 0.81%                     | -                | -                         | -                | -                         | 99.07%           | 0.93%                     | 99.23%           | 0.77%                     |
|            | cc-pVTZ          | 99.23%           | 0.77%                     | 99.21%           | 0.79%                     | -                | -                         | 99.05%           | 0.95%                     | 99.22%           | 0.78%                     |
|            | cc-pVQZ          | 99.23%           | 0.77%                     | 99.21%           | 0.79%                     | -                | -                         | -                | -                         | 99.22%           | 0.78%                     |
| B3LYP      | 6-31G*           | 99.26%           | 0.74%                     | -                | -                         | 99.02%           | 0.98%                     | 99.07%           | 0.93%                     | 99.23%           | 0.77%                     |
|            | cc-pVDZ          | 99.25%           | 0.75%                     | -                | -                         | -                | -                         | 99.07%           | 0.93%                     | 99.24%           | 0.76%                     |
|            | 6-311++G**       | 99.16%           | 0.84%                     | 98.89%           | 1.11%                     | 98.91%           | 1.09%                     | 98.99%           | 1.01%                     | 99.19%           | 0.81%                     |
|            | cc-pVTZ          | 99.23%           | 0.77%                     | 98.91%           | 1.09%                     | 98.97%           | 1.03%                     | 99.03%           | 0.97%                     | 99.21%           | 0.79%                     |
|            | cc-pVQZ          | 99.19%           | 0.81%                     | 98.92%           | 1.08%                     | 98.96%           | 1.04%                     | 99.02%           | 0.98%                     | 99.21%           | 0.79%                     |
| PBE0       | 6-31G*           | 99.24%           | 0.76%                     | 98.94%           | 1.06%                     | 99.02%           | 0.98%                     | 99.08%           | 0.92%                     | 99.24%           | 0.76%                     |
|            | cc-pVDZ          | 99.24%           | 0.76%                     | 98.96%           | 1.04%                     | 99.02%           | 0.98%                     | 99.08%           | 0.92%                     | 99.24%           | 0.76%                     |
|            | 6-311++G**       | 99.20%           | 0.80%                     | 98.93%           | 1.07%                     | 98.94%           | 1.06%                     | 99.01%           | 0.99%                     | 99.21%           | 0.79%                     |
|            | cc-pVTZ          | 99.22%           | 0.78%                     | 98.96%           | 1.04%                     | 98.99%           | 1.01%                     | 99.06%           | 0.94%                     | 99.23%           | 0.77%                     |
|            | cc-pVQZ          | 99.22%           | 0.78%                     | 98.95%           | 1.05%                     | 98.99%           | 1.01%                     | 99.06%           | 0.94%                     | 99.23%           | 0.77%                     |
| B972       | 6-31G*           | 99.24%           | 0.76%                     | -                | -                         | 99.03%           | 0.97%                     | 99.06%           | 0.94%                     | 99.23%           | 0.77%                     |
|            | cc-pVDZ          | 99.24%           | 0.76%                     | 98.89%           | 1.11%                     | 99.01%           | 0.99%                     | 99.05%           | 0.95%                     | 99.23%           | 0.77%                     |
|            | 6-311++G**       | 99.19%           | 0.81%                     | 98.89%           | 1.11%                     | 98.94%           | 1.06%                     | 98.99%           | 1.01%                     | 99.20%           | 0.80%                     |
|            | cc-pVTZ          | 99.23%           | 0.77%                     | 98.89%           | 1.11%                     | 98.98%           | 1.02%                     | 99.03%           | 0.97%                     | 99.22%           | 0.78%                     |
|            | cc-pVQZ          | 99.17%           | 0.83%                     | 98.93%           | 1.07%                     | 98.96%           | 1.04%                     | 99.03%           | 0.97%                     | 99.21%           | 0.79%                     |
| M06        | 6-31G*           | 99.21%           | 0.79%                     | 98.98%           | 1.02%                     | 99.02%           | 0.98%                     | 99.07%           | 0.93%                     | 99.22%           | 0.78%                     |
|            | cc-pVDZ          | 99.21%           | 0.79%                     | 98.96%           | 1.04%                     | 99.01%           | 0.99%                     | 99.07%           | 0.93%                     | 99.22%           | 0.78%                     |
|            | 6-311++G**       | 99.17%           | 0.83%                     | 98.91%           | 1.09%                     | 98.96%           | 1.04%                     | 99.01%           | 0.99%                     | 99.19%           | 0.81%                     |
|            | cc-pVTZ          | 99.19%           | 0.81%                     | 98.95%           | 1.05%                     | 99.00%           | 1.00%                     | 99.05%           | 0.95%                     | 99.21%           | 0.79%                     |
|            | cc-pVQZ          | -                | -                         | 98.95%           | 1.05%                     | 99.00%           | 1.00%                     | 99.03%           | 0.97%                     | 99.21%           | 0.79%                     |
| M11        | 6-31G*           | 99.23%           | 0.77%                     | -                | -                         | 99.06%           | 0.94%                     | 99.12%           | 0.88%                     | 99.23%           | 0.77%                     |
|            | cc-pVDZ          | 99.22%           | 0.78%                     | -                | -                         | 99.06%           | 0.94%                     | 99.13%           | 0.87%                     | 99.23%           | 0.77%                     |
|            | 6-311++G**       | 99.17%           | 0.83%                     | -                | -                         | -                | -                         | 99.05%           | 0.95%                     | 99.19%           | 0.81%                     |
|            | cc-pVTZ          | 99.19%           | 0.81%                     | -                | -                         | 99.01%           | 0.99%                     | 99.07%           | 0.93%                     | 99.20%           | 0.80%                     |
|            | cc-pVQZ          | 99.19%           | 0.81%                     | -                | -                         | 99.01%           | 0.99%                     | 99.07%           | 0.93%                     | 99.20%           | 0.80%                     |

Table S.25: Percentage contribution of enthalpy and entropy terms to the Gibbs free energy of reaction in  $[An(NO_3)_2]^{2+}$  with An = Ac to Np] calculated with LDA, TPSS, B3LYP, PBE0, B972, M06, and M11, the Stuttgart RSC 1997 ECP and associated basis set excluding the most diffuse basis functions for the actinides, and the 6-31G\*, cc-pVDZ, 6-311++G\*\*, cc-pVTZ, and cc-pVQZ basis set for the non-actinide atoms. [Calculated as  $\Delta H/\Delta G \times 100$  and  $T.\Delta S \times 100$ ]

| Functional | Non-An basis set | Ac               |                     | Th               |                     | Pa               |                     | U                |                     | Np               |                     |
|------------|------------------|------------------|---------------------|------------------|---------------------|------------------|---------------------|------------------|---------------------|------------------|---------------------|
|            |                  | $\Delta H_{rxn}$ | $-T.\Delta S_{rxn}$ |
| LDA        | 6-31G*           | 99.12%           | 0.88%               | -                | -                   | 99.25%           | 0.75%               | 99.27%           | 0.73%               | -                | -                   |
|            | cc-pVDZ          | 99.12%           | 0.88%               | -                | -                   | 99.25%           | 0.75%               | -                | -                   | 99.30%           | 0.70%               |
|            | 6-311++G**       | 99.05%           | 0.95%               | -                | -                   | 99.20%           | 0.80%               | 99.22%           | 0.78%               | 99.25%           | 0.75%               |
|            | cc-pVTZ          | 99.08%           | 0.92%               | -                | -                   | 99.23%           | 0.77%               | 99.26%           | 0.74%               | 99.28%           | 0.72%               |
|            | cc-pVQZ          | 99.07%           | 0.93%               | -                | -                   | 99.22%           | 0.78%               | 99.26%           | 0.74%               | 99.27%           | 0.73%               |
| TPSS       | 6-31G*           | 99.07%           | 0.93%               | 99.12%           | 0.88%               | -                | -                   | -                | -                   | -                | -                   |
|            | cc-pVDZ          | 99.07%           | 0.93%               | 99.11%           | 0.89%               | -                | -                   | -                | -                   | -                | -                   |
|            | 6-311++G**       | 99.01%           | 0.99%               | -                | -                   | 99.06%           | 0.94%               | 99.10%           | 0.90%               | 99.13%           | 0.87%               |
|            | cc-pVTZ          | 99.04%           | 0.96%               | 99.10%           | 0.90%               | -                | -                   | 99.13%           | 0.87%               | 99.16%           | 0.84%               |
|            | cc-pVQZ          | 99.04%           | 0.96%               | 99.10%           | 0.90%               | 99.08%           | 0.92%               | 99.13%           | 0.87%               | 99.16%           | 0.84%               |
| B3LYP      | 6-31G*           | 99.07%           | 0.93%               | 99.12%           | 0.88%               | 99.12%           | 0.88%               | 99.15%           | 0.85%               | 99.18%           | 0.82%               |
|            | cc-pVDZ          | 99.07%           | 0.93%               | 99.11%           | 0.89%               | 99.12%           | 0.88%               | 99.15%           | 0.85%               | 99.17%           | 0.83%               |
|            | 6-311++G**       | 99.00%           | 1.00%               | 99.05%           | 0.95%               | 99.06%           | 0.94%               | 99.09%           | 0.91%               | 99.11%           | 0.89%               |
|            | cc-pVTZ          | 99.03%           | 0.97%               | 99.09%           | 0.91%               | 99.09%           | 0.91%               | 99.13%           | 0.87%               | 99.15%           | 0.85%               |
|            | cc-pVQZ          | 99.03%           | 0.97%               | 99.09%           | 0.91%               | 99.08%           | 0.92%               | 99.12%           | 0.88%               | 99.14%           | 0.86%               |
| PBE0       | 6-31G*           | 99.08%           | 0.92%               | 99.14%           | 0.86%               | 99.12%           | 0.88%               | 99.17%           | 0.83%               | 99.18%           | 0.82%               |
|            | cc-pVDZ          | 99.08%           | 0.92%               | -                | -                   | 99.12%           | 0.88%               | 99.16%           | 0.84%               | 99.19%           | 0.81%               |
|            | 6-311++G**       | 99.03%           | 0.97%               | 99.08%           | 0.92%               | 99.09%           | 0.91%               | 99.12%           | 0.88%               | 99.15%           | 0.85%               |
|            | cc-pVTZ          | 99.06%           | 0.94%               | 99.12%           | 0.88%               | 99.09%           | 0.91%               | 99.15%           | 0.85%               | 99.19%           | 0.81%               |
|            | cc-pVQZ          | 99.05%           | 0.95%               | 99.12%           | 0.88%               | 99.11%           | 0.89%               | 99.15%           | 0.85%               | 99.12%           | 0.88%               |
| B972       | 6-31G*           | 99.07%           | 0.93%               | 99.11%           | 0.89%               | 99.12%           | 0.88%               | 99.15%           | 0.85%               | 99.19%           | 0.81%               |
|            | cc-pVDZ          | 99.07%           | 0.93%               | 99.10%           | 0.90%               | 99.12%           | 0.88%               | 99.15%           | 0.85%               | 99.18%           | 0.82%               |
|            | 6-311++G**       | 99.01%           | 0.99%               | 99.05%           | 0.95%               | 99.06%           | 0.94%               | 99.10%           | 0.90%               | 99.13%           | 0.87%               |
|            | cc-pVTZ          | 99.04%           | 0.96%               | 99.09%           | 0.91%               | 99.10%           | 0.90%               | 99.14%           | 0.86%               | 99.17%           | 0.83%               |
|            | cc-pVQZ          | 99.04%           | 0.96%               | 99.09%           | 0.91%               | 99.08%           | 0.92%               | 99.13%           | 0.87%               | 99.17%           | 0.83%               |
| M06        | 6-31G*           | 99.06%           | 0.94%               | 99.09%           | 0.91%               | 99.12%           | 0.88%               | 99.14%           | 0.86%               | -                | -                   |
|            | cc-pVDZ          | 99.06%           | 0.94%               | 99.09%           | 0.91%               | 99.10%           | 0.90%               | 99.14%           | 0.86%               | -                | -                   |
|            | 6-311++G**       | 99.00%           | 1.00%               | 99.04%           | 0.96%               | 99.07%           | 0.93%               | -                | -                   | -                | -                   |
|            | cc-pVTZ          | 99.04%           | 0.96%               | 99.08%           | 0.92%               | 99.10%           | 0.90%               | 99.13%           | 0.87%               | -                | -                   |
|            | cc-pVQZ          | 99.04%           | 0.96%               | 99.08%           | 0.92%               | 99.08%           | 0.92%               | 99.09%           | 0.91%               | -                | -                   |
| M11        | 6-31G*           | 99.07%           | 0.93%               | 99.13%           | 0.87%               | 99.11%           | 0.89%               | 99.16%           | 0.84%               | -                | -                   |
|            | cc-pVDZ          | 99.07%           | 0.93%               | 99.10%           | 0.90%               | 99.12%           | 0.88%               | 99.15%           | 0.85%               | -                | -                   |
|            | 6-311++G**       | 99.00%           | 1.00%               | 99.05%           | 0.95%               | 99.04%           | 0.96%               | 99.09%           | 0.91%               | -                | -                   |
|            | cc-pVTZ          | 99.03%           | 0.97%               | -                | -                   | 99.11%           | 0.89%               | 99.14%           | 0.86%               | -                | -                   |
|            | cc-pVQZ          | 99.03%           | 0.97%               | 99.09%           | 0.91%               | 99.06%           | 0.94%               | 99.09%           | 0.91%               | -                | -                   |

Table S.26: Percentage contribution of enthalpy and entropy terms to the Gibbs free energy of reaction in  $[An(NO_3)_2]^{2+}$  with An = Pu to Cf) calculated with LDA, TPSS, B3LYP, PBE0, B972, M06, and M11, the Stuttgart RSC 1997 ECP and associated basis set excluding the most diffuse basis functions for the actinides, and the 6-31G\*, cc-pVDZ, 6-311++G\*\*, cc-pVTZ, and cc-pVQZ basis set for the non-actinide atoms. [Calculated as  $\Delta H/\Delta G \times 100$  and  $T.\Delta S \times 100$ ]

| Functional | Non-An basis set | Pu               |                     | Am               |                     | Cm               |                     | Bk               |                     | Cf               |                     |
|------------|------------------|------------------|---------------------|------------------|---------------------|------------------|---------------------|------------------|---------------------|------------------|---------------------|
|            |                  | $\Delta H_{rxn}$ | $-T.\Delta S_{rxn}$ |
| LDA        | 6-31G*           | 99.31%           | 0.69%               | 99.21%           | 0.79%               | 99.22%           | 0.78%               | 99.32%           | 0.68%               | 99.33%           | 0.67%               |
|            | cc-pVDZ          | 99.31%           | 0.69%               | 99.21%           | 0.79%               | 99.22%           | 0.78%               | 99.32%           | 0.68%               | 99.33%           | 0.67%               |
|            | 6-311++G**       | 99.25%           | 0.75%               | 99.15%           | 0.85%               | 99.16%           | 0.84%               | 99.28%           | 0.72%               | 99.28%           | 0.72%               |
|            | cc-pVTZ          | 99.29%           | 0.71%               | 99.19%           | 0.81%               | 99.20%           | 0.80%               | 99.30%           | 0.70%               | 99.31%           | 0.69%               |
|            | cc-pVQZ          | 99.28%           | 0.72%               | 99.18%           | 0.82%               | 99.19%           | 0.81%               | 99.30%           | 0.70%               | 99.31%           | 0.69%               |
| TPSS       | 6-31G*           | 99.21%           | 0.79%               | 99.19%           | 0.81%               | 99.18%           | 0.82%               | 99.20%           | 0.80%               | 99.20%           | 0.80%               |
|            | cc-pVDZ          | 99.20%           | 0.80%               | 99.19%           | 0.81%               | 99.18%           | 0.82%               | 99.20%           | 0.80%               | 99.20%           | 0.80%               |
|            | 6-311++G**       | 99.16%           | 0.84%               | -                | -                   | 99.13%           | 0.87%               | 99.16%           | 0.84%               | 99.16%           | 0.84%               |
|            | cc-pVTZ          | 99.19%           | 0.81%               | 99.18%           | 0.82%               | 99.16%           | 0.84%               | 99.19%           | 0.81%               | 99.19%           | 0.81%               |
|            | cc-pVQZ          | 99.19%           | 0.81%               | 99.18%           | 0.82%               | 99.16%           | 0.84%               | 99.19%           | 0.81%               | 99.19%           | 0.81%               |
| B3LYP      | 6-31G*           | 99.20%           | 0.80%               | 99.20%           | 0.80%               | 99.18%           | 0.82%               | 99.20%           | 0.80%               | 99.20%           | 0.80%               |
|            | cc-pVDZ          | 99.20%           | 0.80%               | 99.20%           | 0.80%               | 99.18%           | 0.82%               | 99.20%           | 0.80%               | 99.20%           | 0.80%               |
|            | 6-311++G**       | 99.15%           | 0.85%               | 99.15%           | 0.85%               | 99.12%           | 0.88%               | 99.15%           | 0.85%               | 99.16%           | 0.84%               |
|            | cc-pVTZ          | 99.18%           | 0.82%               | 99.18%           | 0.82%               | 99.16%           | 0.84%               | 99.18%           | 0.82%               | 99.18%           | 0.82%               |
|            | cc-pVQZ          | 99.12%           | 0.88%               | 99.18%           | 0.82%               | 99.15%           | 0.85%               | 99.18%           | 0.82%               | 99.19%           | 0.81%               |
| PBE0       | 6-31G*           | 99.21%           | 0.79%               | 99.22%           | 0.78%               | 99.19%           | 0.81%               | 99.22%           | 0.78%               | 99.23%           | 0.77%               |
|            | cc-pVDZ          | 99.22%           | 0.78%               | 99.22%           | 0.78%               | 99.19%           | 0.81%               | 99.21%           | 0.79%               | 99.22%           | 0.78%               |
|            | 6-311++G**       | 99.05%           | 0.95%               | 99.18%           | 0.82%               | 99.14%           | 0.86%               | 99.17%           | 0.83%               | 99.18%           | 0.82%               |
|            | cc-pVTZ          | 99.20%           | 0.80%               | 99.21%           | 0.79%               | 99.17%           | 0.83%               | 99.20%           | 0.80%               | 99.21%           | 0.79%               |
|            | cc-pVQZ          | 99.12%           | 0.88%               | 99.21%           | 0.79%               | 99.17%           | 0.83%               | 99.20%           | 0.80%               | 99.21%           | 0.79%               |
| B972       | 6-31G*           | 99.21%           | 0.79%               | 99.19%           | 0.81%               | 99.18%           | 0.82%               | 99.20%           | 0.80%               | 99.20%           | 0.80%               |
|            | cc-pVDZ          | 99.19%           | 0.81%               | 99.19%           | 0.81%               | 99.17%           | 0.83%               | 99.20%           | 0.80%               | 99.20%           | 0.80%               |
|            | 6-311++G**       | 99.16%           | 0.84%               | 99.14%           | 0.86%               | 99.13%           | 0.87%               | 99.16%           | 0.84%               | 99.15%           | 0.85%               |
|            | cc-pVTZ          | 99.19%           | 0.81%               | 99.18%           | 0.82%               | 99.16%           | 0.84%               | 99.19%           | 0.81%               | 99.19%           | 0.81%               |
|            | cc-pVQZ          | 99.17%           | 0.83%               | 99.18%           | 0.82%               | 99.16%           | 0.84%               | 99.19%           | 0.81%               | 99.19%           | 0.81%               |
| M06        | 6-31G*           | 99.18%           | 0.82%               | 99.20%           | 0.80%               | 99.17%           | 0.83%               | 99.20%           | 0.80%               | 99.22%           | 0.78%               |
|            | cc-pVDZ          | 99.19%           | 0.81%               | 99.20%           | 0.80%               | 99.16%           | 0.84%               | -                | -                   | 99.22%           | 0.78%               |
|            | 6-311++G**       | 99.14%           | 0.86%               | 99.15%           | 0.85%               | 99.12%           | 0.88%               | 99.15%           | 0.85%               | 99.12%           | 0.88%               |
|            | cc-pVTZ          | 99.17%           | 0.83%               | 99.19%           | 0.81%               | 99.15%           | 0.85%               | -                | -                   | 99.21%           | 0.79%               |
|            | cc-pVQZ          | 99.18%           | 0.82%               | 99.19%           | 0.81%               | 99.15%           | 0.85%               | 99.19%           | 0.81%               | -                | -                   |
| M11        | 6-31G*           | 99.21%           | 0.79%               | -                | -                   | 99.18%           | 0.82%               | -                | -                   | 99.18%           | 0.82%               |
|            | cc-pVDZ          | 99.20%           | 0.80%               | -                | -                   | 99.17%           | 0.83%               | 99.19%           | 0.81%               | 99.19%           | 0.81%               |
|            | 6-311++G**       | 99.10%           | 0.90%               | -                | -                   | 99.13%           | 0.87%               | 99.14%           | 0.86%               | 99.13%           | 0.87%               |
|            | cc-pVTZ          | 99.13%           | 0.87%               | -                | -                   | 99.16%           | 0.84%               | 99.16%           | 0.84%               | 99.18%           | 0.82%               |
|            | cc-pVQZ          | -                | -                   | -                | -                   | 99.15%           | 0.85%               | 99.16%           | 0.84%               | -                | -                   |

Table S.27: Percentage contribution of enthalpy and entropy terms to the Gibbs free energy of reaction in  $[An(NO_3)_2]^{2+}$  with An = Es to Lr] calculated with LDA, TPSS, B3LYP, PBE0, B972, M06, and M11, the Stuttgart RSC 1997 ECP and associated basis set excluding the most diffuse basis functions for the actinides, and the 6-31G\*, cc-pVDZ, 6-311++G\*\*, cc-pVTZ, and cc-pVQZ basis set for the non-actinide atoms. [Calculated as  $\Delta H/\Delta G \times 100$  and  $T.\Delta S \times 100$ ]

| Functional | Non-An basis set | Es               |                     | Fm               |                     | Md               |                     | No               |                     | Lr               |                     |
|------------|------------------|------------------|---------------------|------------------|---------------------|------------------|---------------------|------------------|---------------------|------------------|---------------------|
|            |                  | $\Delta H_{rxn}$ | $-T.\Delta S_{rxn}$ |
| LDA        | 6-31G*           | 99.33%           | 0.67%               | 99.32%           | 0.68%               | 99.30%           | 0.70%               | 99.20%           | 0.80%               | 99.28%           | 0.72%               |
|            | cc-pVDZ          | -                | -                   | 99.32%           | 0.68%               | 99.30%           | 0.70%               | -                | -                   | 99.28%           | 0.72%               |
|            | 6-311++G**       | 99.28%           | 0.72%               | 99.27%           | 0.73%               | 99.26%           | 0.74%               | -                | -                   | 99.23%           | 0.77%               |
|            | cc-pVTZ          | 99.31%           | 0.69%               | 99.30%           | 0.70%               | -                | -                   | -                | -                   | 99.26%           | 0.74%               |
|            | cc-pVQZ          | 99.31%           | 0.69%               | 99.31%           | 0.69%               | 99.26%           | 0.74%               | 99.17%           | 0.83%               | 99.25%           | 0.75%               |
| TPSS       | 6-31G*           | 99.25%           | 0.75%               | 99.21%           | 0.79%               | 99.13%           | 0.87%               | -                | -                   | 99.23%           | 0.77%               |
|            | cc-pVDZ          | -                | -                   | -                | -                   | 99.12%           | 0.88%               | -                | -                   | 99.23%           | 0.77%               |
|            | 6-311++G**       | 99.19%           | 0.81%               | -                | -                   | -                | -                   | 99.00%           | 1.00%               | 99.19%           | 0.81%               |
|            | cc-pVTZ          | -                | -                   | 99.12%           | 0.88%               | 99.11%           | 0.89%               | -                | -                   | -                | -                   |
|            | cc-pVQZ          | 99.23%           | 0.77%               | 99.21%           | 0.79%               | -                | -                   | 99.05%           | 0.95%               | 99.22%           | 0.78%               |
| B3LYP      | 6-31G*           | 99.25%           | 0.75%               | -                | -                   | 98.97%           | 1.03%               | 99.07%           | 0.93%               | 99.23%           | 0.77%               |
|            | cc-pVDZ          | 99.25%           | 0.75%               | 98.96%           | 1.04%               | 98.95%           | 1.05%               | 99.07%           | 0.93%               | 99.23%           | 0.77%               |
|            | 6-311++G**       | 99.19%           | 0.81%               | 98.89%           | 1.11%               | 98.91%           | 1.09%               | 98.98%           | 1.02%               | 99.19%           | 0.81%               |
|            | cc-pVTZ          | 99.22%           | 0.78%               | 98.90%           | 1.10%               | 98.96%           | 1.04%               | 99.03%           | 0.97%               | 99.21%           | 0.79%               |
|            | cc-pVQZ          | 99.22%           | 0.78%               | 98.92%           | 1.08%               | 98.98%           | 1.02%               | 99.02%           | 0.98%               | 99.21%           | 0.79%               |
| PBE0       | 6-31G*           | 99.27%           | 0.73%               | 98.96%           | 1.04%               | 99.02%           | 0.98%               | 99.08%           | 0.92%               | 99.24%           | 0.76%               |
|            | cc-pVDZ          | 99.26%           | 0.74%               | 98.96%           | 1.04%               | 99.02%           | 0.98%               | 99.08%           | 0.92%               | 99.24%           | 0.76%               |
|            | 6-311++G**       | 99.23%           | 0.77%               | 98.93%           | 1.07%               | 98.97%           | 1.03%               | 99.01%           | 0.99%               | 99.20%           | 0.80%               |
|            | cc-pVTZ          | 99.26%           | 0.74%               | 98.96%           | 1.04%               | 99.01%           | 0.99%               | 99.06%           | 0.94%               | 99.23%           | 0.77%               |
|            | cc-pVQZ          | 99.25%           | 0.75%               | 98.95%           | 1.05%               | 98.98%           | 1.02%               | 99.06%           | 0.94%               | 99.23%           | 0.77%               |
| B972       | 6-31G*           | 99.23%           | 0.77%               | 98.94%           | 1.06%               | 99.00%           | 1.00%               | 99.06%           | 0.94%               | 99.23%           | 0.77%               |
|            | cc-pVDZ          | 99.24%           | 0.76%               | -                | -                   | 98.98%           | 1.02%               | 99.05%           | 0.95%               | 99.23%           | 0.77%               |
|            | 6-311++G**       | 99.14%           | 0.86%               | 98.89%           | 1.11%               | -                | -                   | 98.99%           | 1.01%               | 99.19%           | 0.81%               |
|            | cc-pVTZ          | 99.23%           | 0.77%               | 98.92%           | 1.08%               | 98.98%           | 1.02%               | 99.03%           | 0.97%               | 99.22%           | 0.78%               |
|            | cc-pVQZ          | 99.18%           | 0.82%               | 98.93%           | 1.07%               | 98.99%           | 1.01%               | 99.03%           | 0.97%               | 99.21%           | 0.79%               |
| M06        | 6-31G*           | 99.21%           | 0.79%               | 98.97%           | 1.03%               | 99.03%           | 0.97%               | 99.06%           | 0.94%               | 99.22%           | 0.78%               |
|            | cc-pVDZ          | 99.22%           | 0.78%               | 98.96%           | 1.04%               | 99.01%           | 0.99%               | 99.06%           | 0.94%               | 99.22%           | 0.78%               |
|            | 6-311++G**       | 99.17%           | 0.83%               | 98.89%           | 1.11%               | 98.94%           | 1.06%               | 99.01%           | 0.99%               | 99.18%           | 0.82%               |
|            | cc-pVTZ          | -                | -                   | -                | -                   | 98.97%           | 1.03%               | 99.05%           | 0.95%               | 99.21%           | 0.79%               |
|            | cc-pVQZ          | 99.20%           | 0.80%               | 98.95%           | 1.05%               | 99.00%           | 1.00%               | 99.05%           | 0.95%               | 99.21%           | 0.79%               |
| M11        | 6-31G*           | -                | -                   | -                | -                   | 99.05%           | 0.95%               | 99.11%           | 0.89%               | 99.23%           | 0.77%               |
|            | cc-pVDZ          | -                | -                   | -                | -                   | 99.05%           | 0.95%               | 99.11%           | 0.89%               | 99.23%           | 0.77%               |
|            | 6-311++G**       | -                | -                   | -                | -                   | 98.98%           | 1.02%               | 99.05%           | 0.95%               | 99.18%           | 0.82%               |
|            | cc-pVTZ          | 99.17%           | 0.83%               | -                | -                   | 99.01%           | 0.99%               | 99.09%           | 0.91%               | 99.20%           | 0.80%               |
|            | cc-pVQZ          | 99.20%           | 0.80%               | -                | -                   | 99.01%           | 0.99%               | 99.07%           | 0.93%               | 99.20%           | 0.80%               |

Table S.28: Percentage contribution of enthalpy and entropy terms to the Gibbs free energy of reaction in  $[\text{An}(\text{NO}_3)_2]^{2+}_{(\text{aq})}$  with An = Ac to Cf] calculated with B3LYP and PBE0, the Stuttgart RSC 1997 ECP and associated basis set including all functions in the basis set for the actinides, and the 6-31G\*, and 6-311++G\*\*, cc-pVTZ, and cc-pVQZ basis set for the non-actinide atoms. [Calculated as  $\Delta\text{H}/\Delta\text{G} \times 100$  and  $T \cdot \Delta\text{S} \times 100$ ].

|    | $\Delta\text{H}_{\text{rxn}}$ |         |            |         | $-T \cdot \Delta\text{S}_{\text{rxn}}$ |         |            |         |
|----|-------------------------------|---------|------------|---------|----------------------------------------|---------|------------|---------|
|    | B3LYP                         |         | PBE0       |         | B3LYP                                  |         | PBE0       |         |
|    | 6-31G*                        | cc-pVDZ | 6-311++G** | cc-pVTZ | 6-31G*                                 | cc-pVDZ | 6-311++G** | cc-pVTZ |
| Ac | 91.45%                        | 84.37%  | 91.48%     | 86.02%  | 8.55%                                  | 15.63%  | 8.52%      | 13.98%  |
| Th | 94.89%                        | 93.05%  | 95.09%     | -       | 5.11%                                  | 6.95%   | 4.91%      | -       |
| Pa | 93.15%                        | 89.24%  | 93.30%     | 90.35%  | 6.85%                                  | 10.76%  | 6.70%      | 9.65%   |
| U  | 93.94%                        | 90.87%  | 94.69%     | 92.76%  | 6.06%                                  | 9.13%   | 5.31%      | 7.24%   |
| Np | 95.20%                        | 93.37%  | 94.65%     | 92.72%  | 4.80%                                  | 6.63%   | 5.35%      | 7.28%   |
| Pu | 95.47%                        | 93.51%  | 95.13%     | 93.20%  | 4.53%                                  | 6.49%   | 4.87%      | 6.80%   |
| Am | 95.33%                        | 93.22%  | 95.33%     | 93.63%  | 4.67%                                  | 6.78%   | 4.67%      | 6.37%   |
| Cm | 95.09%                        | 92.76%  | 95.04%     | 93.12%  | 4.91%                                  | 7.24%   | 4.96%      | 6.88%   |
| Bk | 95.66%                        | -       | 95.61%     | 94.24%  | 4.34%                                  | -       | 4.39%      | 5.76%   |
| Cf | 95.81%                        | 94.16%  | 95.78%     | 94.45%  | 4.19%                                  | 5.84%   | 4.22%      | 5.55%   |

Table S.29: T1 and D1 values for T1/D1 diagnostic for  $[\text{An}(\text{NO}_3)_2]^{2+}$  (with An = Ac-Lr).

|    | T1    | D1    |
|----|-------|-------|
| Ac | 0.020 | 0.065 |
| Th | 0.027 | 0.100 |
| Pa | 0.075 | 0.358 |
| U  | 0.023 | 0.067 |
| Np | 0.024 | 0.067 |
| Pu | 0.025 | 0.074 |
| Am | 0.024 | 0.065 |
| Cm | 0.021 | 0.066 |
| Dk | 0.023 | 0.066 |
| Cf | 0.027 | 0.108 |
| Es | 0.029 | 0.121 |
| Fm | 0.025 | 0.128 |
| Md | 0.029 | 0.136 |
| No | 0.026 | 0.099 |
| Lr | 0.018 | 0.066 |

Table S.30: Calculated values for the B1 diagnostic for  $[\text{An}(\text{NO}_3)]^{2+}$  (with An = Ac-Es).

| An | B1 (n=1) | B1 (n=2) | B1 (n=3) | B1 (n=4) |
|----|----------|----------|----------|----------|
| Ac | 5.77     | 2.88     | 1.92     | 1.44     |
| Th | 7.00     | 3.50     | 2.33     | 1.75     |
| Pa | 16.26    | 8.13     | 5.42     | 4.07     |
| U  | 10.92    | 5.46     | 3.64     | 2.73     |
| Np | 12.13    | 6.07     | 4.04     | 3.03     |
| Pu | 15.90    | 7.95     | 5.30     | 3.97     |
| Am | 18.70    | 9.35     | 6.23     | 4.68     |
| Cm | 14.29    | 7.15     | 4.76     | 3.57     |
| Bk | 17.94    | 8.97     | 5.98     | 4.48     |
| Cf | 19.83    | 9.91     | 6.61     | 4.96     |
| Es | 21.36    | 10.68    | 7.12     | 5.34     |
